# Supplementary material for: DeephageTP: a convolutional neural network framework for identifying phage-specific proteins from metagenomic sequencing data
Source: PeerJ. 2022 Jun 8;10:e13404. doi: 10.7717/peerj.13404 (PMC9188312; doi:10.7717/peerj.13404)
Supplement: Supplemental Information 3 [file peerj-10-13404-s003.xls]

## Sheet: Table S1
Table S1. The average loss value and the average accuracy of 5-fold cross validation on the training dataset with different sequence length sizes.
Length sizes	Loss Value	Accuracy
800	0.261502	0.967278
900	0.165231	0.979878
1000	0.239005	0.967822

## Sheet: Table S2
Table S2. The average loss value and the average accuracy of 5-fold cross validation on the training dataset with different number of filters.
Number of filers	Loss Value	Accuracy
30	0.173483	0.979742
50	0.165231	0.979878
70	0.162079	0.980512
90	0.156894	0.981328

## Sheet: Table S3
Table S3. The average loss value and the average accuracy of 5-fold cross validation on the training dataset with the different number of neurons in the full connected layer.
Number of neurons	Loss	Accuracy
50	0.185285	0.978291
100	0.165231	0.979878
150	0.165812	0.981011
200	0.155016	0.980512

## Sheet: Table S4
Table S4. The prediction performance of DeephageTP on the seven testing datasets and the mimic dataset (group 8)
Groups	Protein	Accuracy	Precision	Recall	F1
Group 1	TerL	0.95778	0.94266	0.82317	0.87887
	Portal	0.8598	0.96965	0.73008	0.83298
	TerS	0.88036	0.68536	0.73944	0.82725
Group 2	TerL	0.9638	0.92699	0.82317	0.87201
	Portal	0.88036	0.95425	0.73008	0.82725
	TerS	0.95595	0.61513	0.73944	0.67158
Group 3	TerL	0.96826	0.91529	0.82317	0.86679
	Portal	0.89437	0.93825	0.73008	0.82118
	TerS	0.95702	0.55823	0.73944	0.63619
Group 4	TerL	0.97137	0.90312	0.82317	0.86129
	Portal	0.90473	0.92352	0.73008	0.81549
	TerS	0.95663	0.50172	0.73944	0.59781
Group 5	TerL	0.9736	0.88966	0.82317	0.85513
	Portal	0.91266	0.90861	0.73008	0.80962
	TerS	0.95811	0.46913	0.73944	0.57405
Group 6	TerL	0.97556	0.8792	0.82317	0.85026
	Portal	0.91888	0.89412	0.73008	0.80382
	TerS	0.95855	0.43495	0.73944	0.54772
Group 7	TerL	0.97688	0.86606	0.82317	0.84408
	Portal	0.92373	0.87947	0.73008	0.79785
	TerS	0.95838	0.4018	0.73944	0.52067
Group 8	TerL	0.98511	0.71087	0.82317	0.76291
	Portal	0.95355	0.70529	0.73008	0.71748
	TerS	0.96045	0.19062	0.73944	0.3031

## Sheet: Table S5
Table S5. The prediction performance of DeephageTP with cutoff values on the seven testing dataset and the mimic dataset (group 8)
Groups	Protein	Accuracy	Precision	Recall	F1
Group 1	TerL	0.92293	0.99167	0.63492	0.77417
	Portal	0.7811	0.99194	0.57107	0.72484
	TerS	0.95717	0.90759	0.57418	0.70337
Group 2	TerL	0.93894	0.9891	0.63492	0.77339
	Portal	0.82054	0.9871	0.57107	0.72354
	TerS	0.82054	0.9871	0.57107	0.72354
Group 3	TerL	0.94939	0.98687	0.63492	0.77271
	Portal	0.84784	0.98332	0.57107	0.72252
	TerS	0.97078	0.86617	0.57418	0.69058
Group 4	TerL	0.9568	0.98612	0.63492	0.77248
	Portal	0.8676	0.97953	0.57107	0.7215
	TerS	0.97481	0.85614	0.57418	0.68737
Group 5	TerL	0.96208	0.98095	0.63492	0.77089
	Portal	0.88255	0.97356	0.57107	0.71987
	TerS	0.97745	0.83551	0.57418	0.68062
Group 6	TerL	0.96637	0.98001	0.63492	0.7706
	Portal	0.89443	0.96909	0.57107	0.71865
	TerS	0.89443	0.96909	0.57107	0.71865
Group 7	TerL	0.96966	0.9775	0.63492	0.76982
	Portal	0.90392	0.96455	0.57107	0.71739
	TerS	0.90392	0.96455	0.57107	0.71739
Group 8	TerL	0.98789	0.93915	0.63492	0.75763
	Portal	0.95902	0.89811	0.57107	0.69819
	TerS	0.99058	0.6259	0.57418	0.59892

## Sheet: Table S6-1
TableS6 The manual-check result of the protein sequences identified by DeephageTP
Samples		True-positive	Phage-related	Unknown protein	Other function	Total
SRR5192446	TerL	106	23	16	2	147
	Portal	172	103	59	7	341
	TerS	23	274	331	69	697
ERR2868024	TerL	5	4	0	0	9
	Portal	7	6	1	1	15
	TerS	1	8	1	8	18
SRR7892426	TerL	12	4	0	0	16
	Portal	16	5	2	0	23
	TerS	4	31	23	30	88

## Sheet: Table S6-2
TableS6 The manual-check result of the protein sequences identified by DeephageTP
ID of the assembled contig(Wastewater)	ID	Length	Description of sequence alignment(blastp in NCBI;the number in parentheses represents the percent identity)	Class	DIAMOND	HMMER
Sample：SRR5192446
TerL
>NODE_22_length_43710_cov_23.469738_63#40935#42950#-1#ID=22_63	1692	671	phage terminase large subunit GpA-like protein [Thalassospira sp. 11-3]（40%）	True Positive	Yes
>NODE_30_length_41042_cov_27.284424_51#24593#26497#-1#ID=30_51	2199	634	hypothetical protein [Planctomycetes bacterium]（26%）	Phage related
>NODE_49_length_37770_cov_22.126011_13#8992#10707#-1#ID=49_13	3260	571	Phage terminase large subunit (GpA) [Syntrophus sp. PtaB.Bin138]（27%）	True Positive
>NODE_57_length_36169_cov_55.643182_12#7390#8850#1#ID=57_12	3733	486	terminase large subunit [uncultured Mediterranean phage uvMED]（47%）	True Positive	Yes
>NODE_76_length_32078_cov_12.348999_3#1157#3175#1#ID=76_3	4605	672	phage terminase large subunit GpA-like protein [Thalassospira sp. 11-3]（38%）	True Positive	Yes
>NODE_106_length_25222_cov_13.421124_1#1#1779#1#ID=106_1	5799	592	phage holin family protein [Tetrasphaera japonica]（32%）	Phage related
>NODE_113_length_24107_cov_10.400757_39#18773#20464#-1#ID=113_39	6079	563	hypothetical protein E6G97_17835 [Alphaproteobacteria bacterium]（34%）	Phage related
>NODE_122_length_22757_cov_8.904947_18#14645#16723#-1#ID=122_18	6368	692	PBSX family phage terminase large subunit [Candidatus Fermentibacteria bacterium]（51%）	True Positive	Yes
>NODE_133_length_21680_cov_20.348253_4#1730#3388#1#ID=133_4	6700	552	terminase [Sinorhizobium meliloti]（34%）	True Positive	Yes
>NODE_135_length_21176_cov_74.827686_12#5116#6426#1#ID=135_12	6755	436	phage terminase large subunit [uncultured Mediterranean phage uvMED]（42%）	True Positive	Yes
>NODE_135_length_21176_cov_74.827686_13#6480#8348#1#ID=135_13	6756	622	hypothetical protein ACD_5C00095G0002 [uncultured bacterium]（24%）	Phage related
>NODE_135_length_21176_cov_74.827686_26#19261#21174#1#ID=135_26	6769	638	3-hydroxyacyl-CoA dehydrogenase [Pseudomonas fluorescens]（28%）	Phage related
>NODE_147_length_20134_cov_6.879555_23#18114#20132#-1#ID=147_23	7142	672	Phage terminase large subunit (GpA) [Planctomycetes bacterium Pan189]（40%）	True Positive	Yes
>NODE_155_length_19841_cov_14.714105_14#8610#10271#1#ID=155_14	7373	553	hypothetical protein CXZ00_03020 [Acidobacteria bacterium]（27%）	Other function
>NODE_166_length_18987_cov_26.553194_24#16875#18545#-1#ID=166_24	7682	556	terminase large subunit [Streptomyces phage Kromp]（49%）	True Positive	Yes
>NODE_212_length_15716_cov_93.185474_11#7474#9645#-1#ID=212_11	8725	723	tail fiber domain-containing protein [Flagellimonas sp. XY-359]（48%）	Phage related
>NODE_260_length_13832_cov_17.579559_12#9762#11756#-1#ID=260_12	9658	664	putative terminase large subunit [Prokaryotic dsDNA virus sp.]（30%）	True Positive
>NODE_269_length_13597_cov_10.209510_3#5411#6952#1#ID=269_3	9810	513	glycoside hydrolase family 25 [Caudovirales GX15bay]（34%）	Phage related
>NODE_362_length_11140_cov_9.775779_3#697#2388#1#ID=362_3	11457	563	terminase large subunit [Gemmobacter nectariphilus]（47%）	True Positive	Yes
>NODE_415_length_10362_cov_51.535530_5#3843#5567#-1#ID=415_5	12280	574	large subunit terminase [Vibrio phage douglas 12A4]（34%）	True Positive	Yes
>NODE_435_length_10038_cov_5.297501_4#1281#2948#1#ID=435_4	12562	555	Phage terminase large subunit (GpA) [Syntrophus sp. PtaB.Bin138]（28%）	True Positive
>NODE_472_length_9502_cov_22.810650_3#910#2559#1#ID=472_3	13163	549	bacteriophage terminase large subunit [Bacillus thuringiensis]（26%）	True Positive
>NODE_481_length_9403_cov_33.259327_10#7507#9240#-1#ID=481_10	13317	577	terminase large subunit [Variovorax paradoxus]（79%）	True Positive	Yes
>NODE_571_length_8365_cov_25.621954_3#735#2651#1#ID=571_3	14509	638	bifunctional_DNA_primase/polymerase_[Cellulophaga_phage_phi4:1]（35%）	Phage related
>NODE_594_length_8139_cov_109.135541_6#3863#5569#-1#ID=594_6	14775	568	hypothetical protein A2544_01575 [Candidatus Zambryskibacteria bacterium RIFOXYD2_FULL_43_10]（50%）	Phage related
>NODE_605_length_8028_cov_5.883063_8#5962#7386#1#ID=605_8	14902	474	DEAD/DEAH box helicase [Janthinobacterium sp. CG3]（55%）	Phage related
>NODE_609_length_8010_cov_8.380088_8#5167#7047#-1#ID=609_8	14957	626	Phage terminase large subunit (GpA) [Planctomycetes bacterium V144]（31%）	True Positive	Yes
>NODE_614_length_7971_cov_8.378546_3#2101#3840#1#ID=614_3	15016	579	putative terminase large subunit [Salmonella enterica subsp. enterica serovar Kentucky str. 29439]（29%）	True Positive	Yes
>NODE_641_length_7722_cov_23.962600_9#5955#7721#-1#ID=641_9	15297	588	terminase large subunit [Bacteroides sp. KFT8]（32%）	True Positive	Yes
>NODE_671_length_7463_cov_79.232810_6#1535#3394#-1#ID=671_6	15675	619	replication protein B [Siphoviridae sp. ctpQM7] （29%）	Phage related
>NODE_695_length_7276_cov_58.814054_3#3393#5210#-1#ID=695_3	15915	605	hypothetical protein [Sphingobium baderi]（40%）	Phage related
>NODE_837_length_6500_cov_6.972763_3#2036#3796#-1#ID=837_3	17479	586	putative terminase large subunit [Prokaryotic dsDNA virus sp.]（44%）	True Positive	Yes
>NODE_1012_length_5814_cov_4.736191_4#3579#5324#-1#ID=1012_4	19067	581	IS200/IS605 family element transposase accessory protein TnpB [Microcystis aeruginosa]（40%）	Phage related
>NODE_1067_length_5608_cov_17.858666_9#3352#5046#-1#ID=1067_9	19573	564	terminase large subunit [Bacteroides sp. KFT8]（32%）	True Positive	Yes
>NODE_1116_length_5460_cov_6.158217_5#3531#5174#-1#ID=1116_5	19982	547	PBSX family phage terminase large subunit [Balneola sp.]（27%）	True Positive
>NODE_1166_length_5332_cov_6.412593_6#3740#5020#1#ID=1166_6	20411	426	phage terminase large subunit [uncultured Mediterranean phage uvMED]（49%）	True Positive	Yes
>NODE_1334_length_4954_cov_6.239188_4#3159#4829#-1#ID=1334_4	21775	556	terminase large subunit [Pseudomonas asplenii]（68%）	True Positive	Yes
>NODE_1341_length_4943_cov_13.882087_5#3205#4893#-1#ID=1341_5	21834	562	terminase large subunit [Burkholderia cenocepacia]（59%）	True Positive	Yes
>NODE_1358_length_4907_cov_68.320157_2#330#1970#-1#ID=1358_2	21947	546	terL [Corallococcus sp. CAG:1435]（21%）	True Positive
>NODE_1382_length_4852_cov_8.128742_4#1978#3159#1#ID=1382_4	22136	393	Replication protein [uncultured bacterium (gcode 4)]（31%）	Unknown
>NODE_1481_length_4670_cov_71.327965_6#2787#4670#-1#ID=1481_6	22840	627	none	Phage related
>NODE_1485_length_4660_cov_23.470229_2#208#2046#1#ID=1485_2	22867	612	Phage terminase GpA [Candidatus Nitrotoga fabula]（54%）	True Positive	Yes
>NODE_1831_length_4091_cov_6.999502_2#580#2307#1#ID=1831_2	25260	575	tail fiber domain-containing protein [Micavibrio aeruginosavorus]（52%）	Phage related
>NODE_1892_length_4009_cov_5.784443_5#1618#3345#-1#ID=1892_5	25621	575	none	Unknown
>NODE_1948_length_3938_cov_5.281129_5#2234#3772#1#ID=1948_5	25955	512	hypothetical protein [Yersinia kristensenii] （37%）	Unknown
>NODE_1998_length_3883_cov_7.147059_2#941#2794#1#ID=1998_2	26246	617	phage_primase_[Clostridioides_difficile]（28%）	Phage related
>NODE_2073_length_3797_cov_6.177324_5#1582#3231#1#ID=2073_5	26716	549	ATP-dependent DNA helicase [Methanothermobacter thermautotrophicus]（28%）	Unknown
>NODE_2174_length_3701_cov_11.785990_1#229#2013#-1#ID=2174_1	27313	594	terminase large subunit [Aneurinibacillus aneurinilyticus]（26%）	True Positive	Yes
>NODE_2255_length_3634_cov_82.046642_2#1787#3634#-1#ID=2255_2	27770	615	terminase large subunit [Freshwater phage uvFW-CGR-AMD-COM-C449]（39%）	True Positive	Yes
>NODE_2401_length_3510_cov_34.412809_2#1246#2826#-1#ID=2401_2	28586	526	terminase [Burkholderiales bacterium 1_1_47]（30%）	True Positive	Yes	Yes
>NODE_2570_length_3380_cov_26.042057_2#584#2371#-1#ID=2570_2	29518	595	phage/plasmid primase P4 family domain protein [Ruminococcus callidus]（31%）	Phage related
>NODE_2661_length_3310_cov_4.476352_2#398#2080#1#ID=2661_2	29997	560	terminase large subunit [Ammonifex sp.]（63%）	True Positive	Yes
>NODE_2758_length_3243_cov_34.472854_3#600#2486#1#ID=2758_3	30498	628	hypothetical protein BCL74_2052 [Oceanibaculum indicum]（32%）	Unknown
>NODE_2795_length_3222_cov_5.870035_2#1484#3220#1#ID=2795_2	30690	579	phage terminase large subunit [Candidatus Methanoperedens nitroreducens] （33%）	True Positive
>NODE_2823_length_3197_cov_9.669443_1#3#2552#1#ID=2823_1	30835	849	hypothetical protein [Sphingobium chungbukense]（42%）	Unknown
>NODE_2851_length_3180_cov_11.157488_2#1138#2922#1#ID=2851_2	30962	594	phage/plasmid primase P4 family domain protein [Ruminococcus callidus]（30%）	Phage related
>NODE_3021_length_3075_cov_6.590000_2#522#2252#-1#ID=3021_2	31857	576	terminase large subunit [Burkholderia ubonensis]（39%）	True Positive	Yes	Yes
>NODE_3073_length_3044_cov_9.613675_4#818#2860#-1#ID=3073_4	32119	680	phage terminase large subunit family protein [Paucimonas lemoignei]（50%）	True Positive	Yes
>NODE_3087_length_3037_cov_23.694463_4#1277#3037#1#ID=3087_4	32197	587	putative terminase large subunit [Firmicutes bacterium CAG:103]（27%）	True Positive	Yes
>NODE_3360_length_2901_cov_9.286270_3#1245#2900#-1#ID=3360_3	33515	551	phage terminase large subunit [Bacillus sp. GeD10]（28%）	True Positive	Yes
>NODE_3386_length_2889_cov_4.060768_1#2#1912#-1#ID=3386_1	33628	637	terminase [Podoviridae sp. ctrTa16] （27%）	True Positive
>NODE_3400_length_2881_cov_10.215253_1#1#1896#-1#ID=3400_1	33704	632	Phage terminase large subunit (GpA) [Planctomycetes bacterium ETA_A8]（30%）	True Positive	Yes
>NODE_3403_length_2880_cov_25.554367_1#14#2419#1#ID=3403_1	33715	801	DNA adenine methyltransferase YhdJ [Pelotomaculum sp. PtaB.Bin104]（63%）	Other function
>NODE_3558_length_2808_cov_5.086718_2#851#2443#1#ID=3558_2	34439	530	thrombospondin [uncultured marine virus]（27%）	Phage related
>NODE_3579_length_2799_cov_14.102056_2#202#2220#-1#ID=3579_2	34540	672	phage terminase large subunit family protein [Xylophilus ampelinus]（50%）	True Positive	Yes
>NODE_3777_length_2716_cov_25.826581_3#904#2691#1#ID=3777_3	35439	595	PE family protein [Pseudoalteromonas phage Pq0]（30%）	Phage related
>NODE_3886_length_2672_cov_5.065460_2#641#2563#-1#ID=3886_2	35925	640	hypothetical protein EHM48_00640 [Planctomycetaceae bacterium]（36%）	Unknown
>NODE_4172_length_2559_cov_5.754428_1#2#1405#1#ID=4172_1	37206	467	Phage terminase, large subunit [Labilithrix luteola]（25%）	True Positive
>NODE_4421_length_2467_cov_3.975334_2#284#2293#1#ID=4421_2	38280	669	phage terminase large subunit family protein [Pseudomonas sp. GV091]（42%）	True Positive	Yes
>NODE_5087_length_2277_cov_3.721163_2#363#2174#1#ID=5087_2	41018	603	phage terminase large subunit family protein [Rhizobium miluonense]（60%）	True Positive	Yes
>NODE_5135_length_2264_cov_4.271357_2#898#2184#1#ID=5135_2	41209	428	Phage terminase, large subunit, PBSX family [Candidatus Giovannonibacteria bacterium GW2011_GWA2_44_26]（67%）	True Positive
>NODE_5473_length_2175_cov_4.515714_2#359#2056#1#ID=5473_2	42486	565	terminase large subunit [Bacteroides neonati]（31%）	True Positive	Yes
>NODE_6395_length_1988_cov_146.108207_1#3#1775#-1#ID=6395_1	45805	591	hypothetical protein [Verrucomicrobium spinosum]（38%）	Unknown
>NODE_6515_length_1966_cov_4.951877_2#64#1737#1#ID=6515_2	46218	557	ribonucleoside-diphosphate reductase [uncultured Mediterranean phage uvMED]（62%）	Phage related
>NODE_6665_length_1939_cov_5.791845_2#80#1795#1#ID=6665_2	46755	571	terminase large subunit [Sphingomonas sanxanigenens]（31%）	True Positive	Yes
>NODE_6744_length_1926_cov_3.827661_1#2#1894#1#ID=6744_1	47007	630	hypothetical protein [Pedobacter jeongneungensis]（41%）	Unknown
>NODE_6825_length_1908_cov_4.304965_1#57#1907#1#ID=6825_1	47288	617	DegT/DnrJ/EryC1/StrS family aminotransferase [Vibrio parahaemolyticus]（25%）	Unknown
>NODE_7111_length_1864_cov_4.814421_1#1#1824#1#ID=7111_1	48226	607	hypothetical protein Q31a_12050 [Planctomycetes bacterium Q31a]（30%）	Unknown
>NODE_7272_length_1843_cov_7.537330_1#2#1843#1#ID=7272_1	48759	614	exo-alpha-sialidase [Desulfovibrio ferrophilus]（26%）	Unknown
>NODE_7472_length_1813_cov_9.911968_1#156#1811#1#ID=7472_1	49430	552	phage terminase large subunit family protein [Hylemonella gracilis]（34%）	True Positive	Yes
>NODE_8203_length_1714_cov_4.184869_1#4#1713#-1#ID=8203_1	51803	569	phage terminase large subunit family protein [Mesorhizobium sp. Root552]（53%）	True Positive	Yes
>NODE_8261_length_1704_cov_7.158379_1#1#1596#1#ID=8261_1	51983	531	hypothetical protein COU80_06065 [Candidatus Peregrinibacteria bacterium CG10_big_fil_rev_8_21_14_0_10_55_24]（30%）	Unknown
>NODE_8342_length_1693_cov_4.972806_1#3#1352#1#ID=8342_1	52217	449	stabilization protein [Vibrio phage 1.211.A._10N.222.52.F11]（42%）	Phage related
>NODE_8890_length_1626_cov_4.351386_1#1#1332#1#ID=8890_1	53831	443	terminase large subunit [Bordetella phage CN2]（49%）	True Positive	Yes
>NODE_11406_length_1390_cov_6.544487_2#212#1390#1#ID=11406_2	60993	393	hypothetical protein [Solemya velesiana gill symbiont]（34%）	Unknown
>NODE_14_length_48297_cov_15.579217_38#31892#33499#-1#ID=14_38	1139	535	TerL protein [Blastopirellula sp.]（34%）	True Positive	Yes
>NODE_19_length_45043_cov_24.253803_2#766#2277#1#ID=19_2	1450	503	terminase large subunit [Enterococcus phage EF-P10](27%)	True Positive	Yes
>NODE_25_length_43144_cov_14.112610_57#33554#34993#-1#ID=25_57	1876	479	putative large terminase [Shinella sp. DD12](47%)	True Positive	Yes
>NODE_30_length_41042_cov_27.284424_68#38176#39510#-1#ID=30_68	2216	444	PBSX family phage terminase large subunit [Leptospira mayottensis]（38%）	True Positive	Yes
>NODE_41_length_39574_cov_13.858832_6#3211#4755#1#ID=41_6	2816	514	putative terminase large subunit [Ralstonia phage DU_RP_II](55%)	True Positive	Yes	Yes
>NODE_47_length_37987_cov_30.081214_22#17463#18890#-1#ID=47_22	3151	475	PBSX family phage terminase large subunit [uncultured marine virus]（50%）	True Positive	Yes
>NODE_48_length_37921_cov_27.551895_31#16738#18144#1#ID=48_31	3217	468	terminase [Bradyrhizobiaceae bacterium](46%)	True Positive	Yes
>NODE_77_length_31444_cov_283.918518_21#19176#20534#-1#ID=77_21	4667	452	putative phage terminase [Streptomyces thermoautotrophicus](38%)	True Positive	Yes
>NODE_79_length_31100_cov_8.259823_14#7591#8910#1#ID=79_14	4752	439	putative phage-related terminase large subunit; skin element [Bacillus subtilis subsp. subtilis str. 168]（27%）	True Positive	Yes
>NODE_100_length_26475_cov_34.178485_14#4927#6522#1#ID=100_14	5631	531	terminase large subunit [Pseudomonas phage PMBT14]（35%）	True Positive	Yes
>NODE_152_length_19948_cov_16.690434_25#17490#18728#-1#ID=152_25	7312	412	PBSX family phage terminase large subunit [Clostridium tetani]（50%）	True Positive	Yes
>NODE_164_length_19140_cov_7.385523_15#12053#13558#-1#ID=164_15	7626	501	phage terminase large subunit [Ralstonia solanacearum]（37%）	True Positive	Yes
>NODE_185_length_17476_cov_22.657951_11#7572#8825#-1#ID=185_11	8137	417	PBSX family phage terminase large subunit [Halomonadaceae bacterium R4HLG17]（67%）	True Positive	Yes
>NODE_190_length_17288_cov_8.278801_9#7239#8609#-1#ID=190_9	8244	456	PBSX family phage terminase large subunit [Rhodospirillaceae bacterium]（33%）	True Positive	Yes
>NODE_199_length_16446_cov_46.178731_5#3600#5027#1#ID=199_5	8440	475	DNA packaging protein [Pseudomonas segetis]（60%）	True Positive	Yes
>NODE_212_length_15716_cov_93.185474_17#14095#15591#-1#ID=212_17	8731	498	putative large terminase [Pseudoalteromonas phage SL25]（32%）	True Positive	Yes
>NODE_230_length_15061_cov_12.555452_4#1096#2697#-1#ID=230_4	9097	533	hypothetical protein LAV_00063 [Sphingobium phage Lacusarx](46%)	Phage related
>NODE_287_length_12928_cov_6.656267_15#7091#8497#1#ID=287_15	10147	468	terminase [Bradyrhizobiaceae bacterium]（51%）	True Positive	Yes
>NODE_320_length_12080_cov_10.533278_3#1309#2748#-1#ID=320_3	10726	479	phage terminase large subunit [Treponema denticola]（41%）	True Positive	Yes
>NODE_532_length_8737_cov_17.255484_2#670#2175#1#ID=532_2	13990	501	phage protein, large terminase [Glycomyces tenuis]（36%）	True Positive	Yes
>NODE_573_length_8342_cov_44.202371_8#7033#8298#-1#ID=573_8	14540	421	PBSX family phage terminase large subunit [Microvirga lotononidis](55%)	True Positive	Yes	Yes
>NODE_656_length_7641_cov_15.866244_4#1207#2661#1#ID=656_4	15473	484	Terminase large subunit [uncultured Pleomorphomonas sp.](61%)	True Positive	Yes
>NODE_932_length_6124_cov_5.801951_12#4551#6122#1#ID=932_12	18367	524	TerL [Klebsiella phage JD001]（47%）	True Positive	Yes	Yes
>NODE_1093_length_5510_cov_8.431647_6#2395#4173#1#ID=1093_6	19799	592	terminase large subunit [uncultured Mediterranean phage] （25.18%）	True Positive
>NODE_1214_length_5219_cov_12.065902_5#2355#3965#1#ID=1214_5	20823	536	terminase large subunit [Vibrio phage 1.235.O._10N.261.52.B2]（69%）	True Positive	Yes
>NODE_1306_length_5003_cov_6.077313_2#2216#3565#1#ID=1306_2	21570	449	phage terminase large subunit [Singulisphaera acidiphila]（40%）	True Positive	Yes
>NODE_1392_length_4822_cov_13.204550_4#3096#4553#-1#ID=1392_4	22202	485	terL [Corallococcus sp. CAG:1435](30%)	True Positive
>NODE_1555_length_4538_cov_21.732019_3#744#2192#1#ID=1555_3	23334	482	terminase [Burkholderiales bacterium GWE1_65_30] （41.04%）	True Positive	Yes
>NODE_1606_length_4457_cov_11.635783_2#237#1553#-1#ID=1606_2	23677	438	PBSX family phage terminase large subunit [Nonomuraea sp. NEAU-YG30]（59%）	True Positive	Yes
>NODE_1728_length_4269_cov_6.426323_4#2251#3831#-1#ID=1728_4	24598	526	terminase [Streptomyces hoynatensis]（40%）	True Positive	Yes
>NODE_1752_length_4214_cov_10.249336_2#487#1989#1#ID=1752_2	24762	500	terminase large subunit [Streptomyces phage Kromp](47%)	True Positive	Yes
>NODE_1830_length_4091_cov_11.300797_4#2179#3684#1#ID=1830_4	25256	501	terminase [Verrucomicrobiaceae bacterium]（65%）	True Positive	Yes
>NODE_1844_length_4072_cov_6.219665_2#437#2029#1#ID=1844_2	25335	530	phage terminase large subunit [Escherichia coli]（22%）	True Positive	Yes
>NODE_1976_length_3915_cov_11.765365_3#1103#2701#-1#ID=1976_3	26101	532	terminase [Mesorhizobium sp. M7D.F.Ca.US.004.03.1.1]（27%）	True Positive
>NODE_2051_length_3824_cov_15.671112_3#1051#2649#-1#ID=2051_3	26571	532	putative terminase large subunit [Prokaryotic dsDNA virus sp.] (25%)	True Positive
>NODE_2251_length_3638_cov_19.959585_2#798#2294#-1#ID=2251_2	27743	498	terminase DNA packaging enzyme large subunit [Acinetobacter phage vB_ApiM_fHyAci03](30%)	True Positive
>NODE_2266_length_3628_cov_7.385590_4#944#2395#1#ID=2266_4	27831	483	phage terminase large subunit [Komagataeibacter intermedius TF2]（54%）	True Positive	Yes
>NODE_2378_length_3536_cov_64.546952_8#2058#3473#1#ID=2378_8	28461	471	putative phage terminase large subunit-like protein [Achromobacter marplatensis]（62%）	True Positive	Yes
>NODE_2462_length_3464_cov_9.251992_5#1135#2757#1#ID=2462_5	28933	540	terminase [Bradyrhizobiaceae bacterium]（49%）	True Positive	Yes
>NODE_2599_length_3359_cov_7.454629_2#131#1525#-1#ID=2599_2	29677	464	terminase large subunit [Pseudomonas phage AAT-1]（49%）	True Positive	Yes
>NODE_2985_length_3095_cov_9.085762_2#924#2486#-1#ID=2985_2	31665	520	terminase [Macrococcus caseolyticus]（33%）	True Positive	Yes
>NODE_3243_length_2958_cov_4.488033_2#134#1627#-1#ID=3243_2	32925	497	TerL protein [Bordetella genomosp. 9](45%)	True Positive	Yes
>NODE_3904_length_2662_cov_7.286046_2#249#1502#1#ID=3904_2	35996	417	PBSX family phage terminase large subunit [Halomonadaceae bacterium R4HLG17](67%)	True Positive	Yes
>NODE_4261_length_2528_cov_8.192417_2#147#1460#1#ID=4261_2	37603	437	Phage terminase [uncultured Alphaproteobacteria bacterium]	True Positive	Yes
>NODE_4379_length_2482_cov_7.341088_3#506#1783#-1#ID=4379_3	38100	425	PBSX family phage terminase large subunit [Candidatus Fermentibacteria bacterium]（41%）	True Positive
>NODE_4630_length_2404_cov_3.704594_1#3#1376#1#ID=4630_1	39192	457	terminase large subunit [Providencia phage Redjac](51%)	True Positive	Yes
>NODE_4800_length_2355_cov_5.365789_1#2#1405#-1#ID=4800_1	39872	468	putative TerL large-subunit terminase [Aeromonas phage vB_AsaM-56]（42%）	True Positive	Yes
>NODE_5040_length_2290_cov_70.597743_2#270#1514#1#ID=5040_2	40843	414	PBSX family phage terminase large subunit [Halomonadaceae bacterium R4HLG17]（65%）	True Positive	Yes
>NODE_5189_length_2247_cov_7.405617_2#558#2081#1#ID=5189_2	41427	507	large terminase protein [Pectobacterium carotovorum](23%)	True Positive	Yes
>NODE_6022_length_2058_cov_72.633384_3#491#2023#1#ID=6022_3	44478	510	putative_phage_terminase_large_subunit-like_protein_[Heliophilum_fasciatum]（24%）	True Positive	Yes
>NODE_6267_length_2014_cov_8.902527_2#485#1966#1#ID=6267_2	45353	493	putative phage terminase large subunit-like protein [Achromobacter marplatensis]（49%）	True Positive	Yes
>NODE_6345_length_1998_cov_4.759230_3#360#1862#-1#ID=6345_3	45620	500	terminase large subunit [Nocardiopsis gilva]（57%）	True Positive	Yes	Yes
>NODE_6465_length_1975_cov_9.579474_2#373#1974#1#ID=6465_2	46028	534	phage terminase large subunit-like protein [Nocardia puris]（45%）	True Positive	Yes	Yes
>NODE_7918_length_1750_cov_7.220896_2#359#1750#-1#ID=7918_2	50885	463	phage terminase large subunit [Candidatus Liberibacter americanus](38%)	True Positive	Yes	Yes
>NODE_8088_length_1728_cov_4.490623_2#69#1631#-1#ID=8088_2	51433	520	terminase large subunit [Vibrio phage 1.232.O._10N.261.51.E11]935%)	True Positive	Yes
>NODE_8319_length_1696_cov_3.901295_1#60#1340#-1#ID=8319_1	52153	426	PBSX family phage terminase large subunit [Nitrosospira briensis]（48%）	True Positive	Yes	Yes
>NODE_9127_length_1600_cov_3.526557_1#2#1600#-1#ID=9127_1	54552	533	DNA polymerase I [Cupriavidus taiwanensis](34%)	Unknown
>NODE_10197_length_1493_cov_5.468265_2#95#1492#-1#ID=10197_2	57676	465	PBSX family phage terminase large subunit [Lactobacillus sp. 54-5]（50%）	True Positive	Yes
>NODE_10237_length_1490_cov_18.478445_1#2#1288#1#ID=10237_1	57793	428	Terminase large subunit [uncultured Pleomorphomonas sp.](46%)	True Positive	Yes
>NODE_10299_length_1485_cov_7.009929_1#2#1483#1#ID=10299_1	57973	494	putative terminase, large subunit [Pseudomonas phage KPP25]（41%）	True Positive	Yes
>NODE_10925_length_1427_cov_47.231509_1#1#1425#-1#ID=10925_1	59717	475	none	Unknown
>NODE_11996_length_1348_cov_6.481540_1#2#1348#1#ID=11996_1	62568	449	terminase large subunit [uncultured Mediterranean phage]（45%）	True Positive	Yes
Portal
>NODE_12_length_51142_cov_19.654454_69#44966#46990#-1#ID=12_69	1020	674	hypothetical protein A3F67_10935 [Verrucomicrobia bacterium RIFCSPHIGHO2_12_FULL_41_10]（48%）	Phage related
>NODE_14_length_48297_cov_15.579217_14#7786#9453#-1#ID=14_14	1115	555	none	Phage related
>NODE_16_length_45652_cov_11.011541_60#31011#32747#1#ID=16_60	1297	578	hypothetical protein DRP04_00915 [Archaeoglobales archaeon]（26%）	Phage related
>NODE_19_length_45043_cov_24.253803_6#3371#5095#1#ID=19_6	1454	574	hypothetical protein DRJ03_02665 [Chloroflexi bacterium]（21%）	Phage related
>NODE_21_length_44100_cov_17.870710_9#5682#7361#1#ID=21_9	1594	559	phage head-tail connector protein [Bordetella parapertussis]（73%）	True Positive	Yes
>NODE_27_length_42362_cov_12.695178_59#26944#28734#-1#ID=27_59	2015	596	tail fiber domain-containing protein [Sphingomonas]（58%）	Phage related
>NODE_30_length_41042_cov_27.284424_67#36086#38185#-1#ID=30_67	2215	699	phage portal protein [Planctomycetes bacterium]（32%）	True Positive	Yes
>NODE_32_length_40423_cov_23.529469_8#5199#6914#-1#ID=32_8	2290	571	Bacteriophage head to tail connecting protein [Pelotomaculum sp. PtaB.Bin104]（51%）	True Positive	Yes
>NODE_36_length_40044_cov_26.135530_3#2255#4312#-1#ID=36_3	2518	685	phage portal protein [Candidatus Desulfofervidus auxilii] （23%）	True Positive
>NODE_37_length_39999_cov_21.510044_5#2367#4112#1#ID=37_5	2570	581	phage head-tail connector protein [Phaeospirillum fulvum]（38%）	True Positive	Yes
>NODE_39_length_39802_cov_50.073527_48#24760#27309#1#ID=39_48	2723	849	hypothetical protein [Burkholderia ubonensis]（32%）	Phage related
>NODE_40_length_39635_cov_15.195197_45#26644#28305#-1#ID=40_45	2785	553	amino acid dehydrogenase [Zetaproteobacteria bacterium]（33%）	Phage related
>NODE_41_length_39574_cov_13.858832_9#5426#7069#1#ID=41_9	2819	547	phage head-tail adapter protein [Nitrosomonadaceae]（60%）	True Positive
>NODE_44_length_38764_cov_24.121120_38#19065#20306#-1#ID=44_38	3004	413	glycosyltransferase family 2 protein [Gemmatimonadales bacterium]（35%）	Phage related
>NODE_46_length_38482_cov_28.869737_19#9737#11815#1#ID=46_19	3090	692	portal protein [Bosea sp. BIWAKO-01]（38%）	True Positive	Yes
>NODE_46_length_38482_cov_28.869737_30#19022#20458#1#ID=46_30	3101	478	hypothetical protein [Rhodoplanes piscinae]（35%）	Phage related
>NODE_47_length_37987_cov_30.081214_21#15320#17470#-1#ID=47_21	3150	716	Phage protein [Candidatus Woesebacteria bacterium GW2011_GWB1_39_12]（22%）	Phage related
>NODE_50_length_37334_cov_120.951528_7#5476#7494#1#ID=50_7	3311	672	hypothetical protein [Nitrosovibrio sp. Nv6]（35%）	Phage related
>NODE_51_length_37219_cov_124.632107_10#4422#6191#1#ID=51_10	3375	589	hypothetical protein A2W05_07095 [Candidatus Schekmanbacteria bacterium RBG_16_38_10]（39%）	Phage related
>NODE_53_length_36899_cov_13.073295_12#14247#15728#-1#ID=53_12	3486	493	Phage protein [Parcubacteria bacterium C7867-008]（38%）	Phage related
>NODE_55_length_36557_cov_82.741982_41#25316#26851#-1#ID=55_41	3637	511	phage portal protein [Bacteriodetes bacterium]（29%）	True Positive
>NODE_56_length_36465_cov_10.915114_38#16192#18195#1#ID=56_38	3695	667	hypothetical protein [Bradyrhizobium icense]（75%）	Phage related	Yes
>NODE_60_length_35842_cov_12.430257_22#11111#13366#1#ID=60_22	3897	751	hypothetical protein [Magnetococcus marinus]（36%）	Phage related
>NODE_63_length_35092_cov_73.922124_20#19085#20740#-1#ID=63_20	4052	551	phage head-tail adapter protein [Azoarcus sp. CC-YHH848]（54%）	True Positive	Yes
>NODE_71_length_33066_cov_6.599042_6#4604#7264#1#ID=71_6	4388	886	hypothetical protein A2125_01455 [Candidatus Woesebacteria bacterium GWB1_43_5]（32%）	Phage related
>NODE_73_length_32442_cov_158.978188_20#12391#14019#1#ID=73_20	4485	542	phage portal protein [Thermovibrio ammonificans]（28%）	True Positive
>NODE_77_length_31444_cov_283.918518_19#16763#18688#-1#ID=77_19	4665	641	portal protein [Microbacterium phage Burro]（25%）	True Positive
>NODE_80_length_31077_cov_523.269725_20#17996#19966#-1#ID=80_20	4794	656	portal protein [Phormidium virus WMP3] （21.93%）	True Positive	Yes
>NODE_102_length_25714_cov_9.025040_20#19439#21367#-1#ID=102_20	5702	642	hypothetical protein EKK63_11540 [Acinetobacter sp.]（38%）	Phage related
>NODE_107_length_25133_cov_106.760476_27#19368#20597#-1#ID=107_27	5865	409	phage portal protein [Alphaproteobacteria bacterium]（31%）	True Positive	Yes
>NODE_108_length_24976_cov_36.582627_26#19678#21804#-1#ID=108_26	5902	708	Head-tail connector protein [uncultured Mediterranean phage uvMED]（33%）	True Positive
>NODE_122_length_22757_cov_8.904947_16#12394#14211#-1#ID=122_16	6366	605	hypothetical protein A2163_07950 [Actinobacteria bacterium RBG_13_35_12]（57%）	Phage related
>NODE_124_length_22457_cov_26.036369_32#13746#15671#1#ID=124_32	6442	641	hypothetical protein CTY28_10185 [Hyphomicrobium sp.]（48%）	Phage related	Yes
>NODE_133_length_21680_cov_20.348253_5#3403#4845#1#ID=133_5	6701	480	DUF935 family protein [Deinococcus gobiensis]（28%）	Phage related
>NODE_134_length_21519_cov_23.696092_23#20234#21517#1#ID=134_23	6743	428	none	Phage related
>NODE_135_length_21176_cov_74.827686_20#12448#13956#1#ID=135_20	6763	502	none	Phage related
>NODE_136_length_21136_cov_22.356346_26#19306#20502#1#ID=136_26	6795	398	endolysin_[Listeria_phage_LipZ5]（60%）	Phage related
>NODE_138_length_20715_cov_25.978634_24#14256#16505#-1#ID=138_24	6851	749	hypothetical protein [Euryarchaeota archaeon]（28%）	Phage related
>NODE_152_length_19948_cov_16.690434_4#4735#6993#-1#ID=152_4	7291	752	phage tail tape measure protein [bacterium]（27%）	Phage related
>NODE_152_length_19948_cov_16.690434_24#15964#17493#-1#ID=152_24	7311	509	phage portal protein [Candidatus Promineofilum breve]（35%）	True Positive
>NODE_153_length_19938_cov_7.078337_16#14833#16860#-1#ID=153_16	7330	675	phage portal protein [Spirochaetaceae bacterium 4572_59]（28%）	True Positive	Yes
>NODE_154_length_19937_cov_47.465361_20#10557#11774#-1#ID=154_20	7353	405	major capsid protein [uncultured Mediterranean phage uvMED]（23%）	Phage related
>NODE_160_length_19646_cov_16.870063_3#1745#3247#-1#ID=160_3	7509	500	hypothetical protein DRI65_15040 [Chloroflexi bacterium]（26%）	Phage related
>NODE_160_length_19646_cov_16.870063_15#9821#11758#-1#ID=160_15	7521	645	portal protein [Microbacterium phage TinyTimothy]（19%）	True Positive
>NODE_167_length_18708_cov_27.124564_19#13743#15809#-1#ID=167_19	7702	688	hypothetical protein [Chromobacterium subtsugae]（41%）	Phage related
>NODE_201_length_16372_cov_12.084187_12#8478#10133#1#ID=201_12	8485	551	phage portal protein [Gammaproteobacteria bacterium RIFCSPHIGHO2_12_FULL_63_22]（30%）	True Positive
>NODE_210_length_15783_cov_6.784314_25#12753#14486#1#ID=210_25	8684	577	hypothetical protein D6822_07010 [Cyanobacteria bacterium J149]（28%）	Phage related
>NODE_217_length_15514_cov_14.223913_11#6807#8642#1#ID=217_11	8842	611	hypothetical protein A2612_01500 [Candidatus Moranbacteria bacterium RIFOXYD1_FULL_44_12]（31%）	Phage related
>NODE_224_length_15337_cov_11.111257_21#14253#15335#1#ID=224_21	9013	361	phage protein [Escherichia phage L27]（26%）	Phage related
>NODE_231_length_14921_cov_11.328641_14#7736#9889#-1#ID=231_14	9128	717	phage portal protein [Sphingopyxis sp. C-1]（40%）	True Positive	Yes
>NODE_232_length_14880_cov_36.526849_6#4341#6254#1#ID=232_6	9142	637	hypothetical protein A2612_01500 [Candidatus Moranbacteria bacterium RIFOXYD1_FULL_44_12]（39%）	Phage related
>NODE_239_length_14660_cov_21.949949_13#12105#13838#-1#ID=239_13	9298	577	phage head-tail adapter protein [Eikenella sp. NML96-A-049]（50%）	True Positive	Yes
>NODE_247_length_14428_cov_18.022434_17#10637#12385#-1#ID=247_17	9449	582	phage portal protein [Halomonas sp. TQ8S]（62%）	True Positive	Yes
>NODE_259_length_13837_cov_11.411205_6#3560#4819#1#ID=259_6	9632	419	phage portal protein [Jeongeupia sp. USM3]（55%）	True Positive	Yes
>NODE_270_length_13591_cov_11.533516_15#7134#9185#1#ID=270_15	9838	683	hypothetical protein EKK63_11540 [Acinetobacter sp.]（32%）	Phage related
>NODE_283_length_13016_cov_8.321768_5#1557#3239#1#ID=283_5	10054	560	phage prohead protease, HK97 family [Thermaerobacter marianensis DSM 12885]（37%）	Phage related
>NODE_287_length_12928_cov_6.656267_17#8760#11084#1#ID=287_17	10149	774	hypothetical protein [Janthinobacterium sp. Marseille]（49%）	Phage related
>NODE_295_length_12750_cov_119.277081_11#5764#7803#-1#ID=295_11	10288	679	hypothetical protein [Lysinibacillus sp. F5]（24%）	Phage related
>NODE_304_length_12492_cov_129.679311_6#2747#4570#1#ID=304_6	10467	607	hypothetical protein EHM40_21325 [Chloroflexi bacterium]（23%）	Phage related
>NODE_305_length_12465_cov_10.601453_10#7240#8970#-1#ID=305_10	10481	576	phage head-tail adapter protein [Parvibaculum sp.]（25%）	True Positive	Yes
>NODE_315_length_12262_cov_17.034053_7#4517#6697#-1#ID=315_7	10638	726	phage portal protein [Planctomycetes bacterium]（26%）	True Positive
>NODE_318_length_12149_cov_60.040417_10#6109#8142#-1#ID=318_10	10693	677	hypothetical protein A3F67_10935 [Verrucomicrobia bacterium RIFCSPHIGHO2_12_FULL_41_10]（47%）	Phage related
>NODE_330_length_11835_cov_15.204847_2#143#2062#1#ID=330_2	10882	639	portal protein [Klebsiella phage KP8]（24%）	True Positive
>NODE_350_length_11291_cov_10.280403_14#7625#9709#1#ID=350_14	11266	694	phage portal protein [Candidatus Saccharimonas sp.]（46%）	True Positive
>NODE_352_length_11273_cov_6.974013_3#2543#4963#1#ID=352_3	11284	806	putative portal protein [Roseobacter phage CRP-1]（25%）	True Positive
>NODE_362_length_11140_cov_9.775779_4#2544#4313#1#ID=362_4	11458	589	phage portal protein [Peptoclostridium litorale]（38%）	True Positive	Yes
>NODE_375_length_10919_cov_14.333272_2#385#2529#-1#ID=375_2	11655	714	hypothetical protein CTY14_02075 [Methylotenera sp.]（37%）	Phage related
>NODE_377_length_10903_cov_5.721463_2#1078#2583#1#ID=377_2	11695	501	minor capsid protein [Acinetobacter oleivorans] （31%）	Phage related
>NODE_380_length_10861_cov_7.520490_1#2#2083#-1#ID=380_1	11752	694	CHAP domain-containing protein [Bifidobacterium bombi]（61%）	Other function
>NODE_400_length_10641_cov_25.411225_12#4671#6869#1#ID=400_12	12073	732	portal protein [uncultured Mediterranean phage uvMED]（35%）	True Positive	Yes
>NODE_413_length_10385_cov_93.318914_10#6673#8712#-1#ID=413_10	12259	679	hypothetical protein [Candidatus Pacearchaeota archaeon]（43%）	Phage related
>NODE_438_length_9955_cov_21.496255_9#3555#5432#1#ID=438_9	12613	625	hypothetical protein EKK63_11540 [Acinetobacter sp.]（37%）	Phage related
>NODE_440_length_9932_cov_8.109161_11#8019#9800#-1#ID=440_11	12654	593	phage portal protein [Halomonas sp. TQ8S]（61%）	True Positive	Yes
>NODE_442_length_9923_cov_18.646527_11#6208#7902#-1#ID=442_11	12684	564	phage head-tail connector protein [Bordetella parapertussis]（53%）	True Positive	Yes
>NODE_446_length_9826_cov_10.171367_2#154#2067#1#ID=446_2	12733	637	portal protein [uncultured Mediterranean phage uvMED]（23%）	True Positive
>NODE_461_length_9638_cov_53.832270_7#6163#7944#-1#ID=461_7	12969	593	NlpC/P60 family protein [Andreesenia angusta]（30%）	Phage related
>NODE_465_length_9555_cov_4.739346_1#2#2020#1#ID=465_1	13036	672	putative portal protein [Prokaryotic dsDNA virus sp.]（22%）	True Positive	Yes
>NODE_480_length_9407_cov_25.916417_7#4536#6362#-1#ID=480_7	13304	608	Phage portal protein, lambda family [Pirellula sp. SH-Sr6A]（56%）	True Positive	Yes
>NODE_481_length_9403_cov_33.259327_8#5670#7355#-1#ID=481_8	13315	561	phage portal protein [Gammaproteobacteria bacterium RIFCSPHIGHO2_12_FULL_63_22]（47%）	True Positive	Yes
>NODE_485_length_9355_cov_14.880496_2#144#2096#-1#ID=485_2	13364	650	hypothetical protein DIU68_19420 [Chloroflexi bacterium]（30%）	Phage related
>NODE_502_length_9131_cov_17.444015_2#379#2328#1#ID=502_2	13602	649	hypothetical protein EKK63_11540 [Acinetobacter sp.]（34%）	Phage related
>NODE_512_length_9017_cov_8.255983_5#4471#6666#-1#ID=512_5	13750	731	putative portal protein [Brucella phage 141_19]（39%）	True Positive
>NODE_528_length_8786_cov_13.834118_4#3419#5446#1#ID=528_4	13953	675	hypothetical protein A3F67_10935 [Verrucomicrobia bacterium RIFCSPHIGHO2_12_FULL_41_10]（44%）	Phage related
>NODE_529_length_8775_cov_7.538506_6#3334#5151#1#ID=529_6	13965	605	hypothetical protein [uncultured marine virus]（49%）	Phage related
>NODE_551_length_8597_cov_19.979582_8#5453#6967#1#ID=551_8	14288	504	hypothetical protein [Nitrosovibrio sp. Nv6]（49%）	Phage related
>NODE_573_length_8342_cov_44.202371_7#4888#7008#-1#ID=573_7	14539	706	Portal protein [Janthinobacterium sp. CG23_2]（43%）	True Positive	Yes
>NODE_587_length_8203_cov_6.625738_4#2797#4572#1#ID=587_4	14692	591	portal (connector) protein [Vibrio phage JSF27]（48%）	True Positive	Yes
>NODE_590_length_8185_cov_28.923798_9#4920#6188#-1#ID=590_9	14738	422	phage portal protein [Lechevalieria deserti]（56%）	True Positive	Yes
>NODE_624_length_7853_cov_8.032399_6#5196#7586#-1#ID=624_6	15106	796	hypothetical protein A3E01_00250 [Gammaproteobacteria bacterium RIFCSPHIGHO2_12_FULL_63_22]（59%）	Unknown
>NODE_637_length_7736_cov_5.365357_1#3#1448#-1#ID=637_1	15256	482	hypothetical protein AUK45_05005 [Candidatus Peregrinibacteria bacterium CG2_30_44_17]（30%）	Phage related
>NODE_651_length_7683_cov_21.256966_13#5323#7383#1#ID=651_13	15414	686	hypothetical protein [Burkholderia sp. KK1]（47%）	Phage related
>NODE_678_length_7428_cov_6.568475_1#2#1672#1#ID=678_1	15767	556	hypothetical protein CTY14_02075 [Methylotenera sp.]（37%）	Phage related
>NODE_695_length_7276_cov_58.814054_1#1#1980#-1#ID=695_1	15913	660	lysozyme [Serratia marcescens]（36%）	Unknown
>NODE_701_length_7227_cov_5.234899_12#5358#6665#-1#ID=701_12	15998	435	hypothetical protein [Phage sp.]（46%）	Phage related
>NODE_769_length_6854_cov_8.236171_10#4156#6168#-1#ID=769_10	16760	670	phage portal protein [blood disease bacterium A2-HR MARDI]（27%）	True Positive
>NODE_778_length_6798_cov_38.385840_5#2334#4265#-1#ID=778_5	16864	643	portal protein [Microbacterium phage Araxxi]（26%）	True Positive
>NODE_785_length_6769_cov_7.442785_5#3055#5025#-1#ID=785_5	16940	656	phage portal protein [Afipia sp.]（41%）	True Positive
>NODE_797_length_6667_cov_6.962985_2#1004#2305#1#ID=797_2	17045	433	hypothetical protein EHM17_16845 [Verrucomicrobiaceae bacterium]（36%）	Phage related
>NODE_830_length_6526_cov_9.014881_3#592#2913#-1#ID=830_3	17404	773	Phage P22-like portal protein [Noviherbaspirillum humi]（47%）	True Positive	Yes
>NODE_837_length_6500_cov_6.972763_2#248#2005#-1#ID=837_2	17478	585	hypothetical protein GOVbin1630_50 [Prokaryotic dsDNA virus sp.]（38%）	Phage related
>NODE_844_length_6466_cov_5.672508_6#3596#5101#1#ID=844_6	17544	501	DUF935 family protein [Proteobacteria bacterium]（23%）	Phage related
>NODE_916_length_6175_cov_7.255738_3#1521#3059#1#ID=916_3	18210	512	phage portal protein [Desulfonatronum thioautotrophicum]（24%）	True Positive
>NODE_954_length_6054_cov_6.162569_2#1170#3338#1#ID=954_2	18533	722	phage portal protein [Falsochrobactrum sp. HN4]（45%）	True Positive	Yes
>NODE_963_length_6002_cov_5.876835_4#2306#3556#-1#ID=963_4	18637	416	phage portal protein [Mesorhizobium sp.]（68%）	True Positive	Yes
>NODE_974_length_5964_cov_10.657157_5#2932#5163#-1#ID=974_5	18731	743	phage portal protein [Afipia sp.]（39%）	True Positive
>NODE_999_length_5863_cov_31.416724_2#119#1723#1#ID=999_2	18935	534	phage head-tail adapter protein [Dehalococcoidia bacterium]（44%）	True Positive
>NODE_1002_length_5854_cov_8.133241_5#4202#5854#-1#ID=1002_5	18962	550	hypothetical protein [Giesbergeria anulus]（33%）	Phage related
>NODE_1032_length_5752_cov_9.397569_9#3764#5575#1#ID=1032_9	19250	603	phage major capsid protein [Pseudorhodoferax sp. Leaf274]（52%）	Phage related
>NODE_1078_length_5556_cov_6.090312_5#2178#4646#-1#ID=1078_5	19656	822	phage portal protein [Ignavibacteriales bacterium]（26%）	True Positive	Yes
>NODE_1080_length_5549_cov_12.967665_3#481#2115#-1#ID=1080_3	19669	544	Bacteriophage head to tail connecting protein [Klebsiella oxytoca]（49%）	True Positive
>NODE_1086_length_5529_cov_6.197836_4#3001#4371#-1#ID=1086_4	19724	456	TonB-dependent receptor [Polymorphobacter sp. DJ1R-1]（26%）	Phage related
>NODE_1113_length_5468_cov_6.356388_2#1682#3583#1#ID=1113_2	19956	633	hypothetical protein EKK58_11645 [Candidatus Dependentiae bacterium]（60%）	Phage related
>NODE_1194_length_5266_cov_5.128492_5#2139#3965#1#ID=1194_5	20657	608	portal protein [Cyanophage PP]（23%）	True Positive
>NODE_1207_length_5244_cov_26.738247_7#3359#5068#1#ID=1207_7	20775	569	phage portal protein [Xanthomonas sp. MUS 060]（23%）	True Positive
>NODE_1213_length_5221_cov_9.047221_1#1#1596#1#ID=1213_1	20811	531	hypothetical protein [Bacteroidales bacterium]（29%）	Phage related
>NODE_1222_length_5202_cov_13.638190_3#521#1951#1#ID=1222_3	20884	476	phage portal protein [Microvirgula aerodenitrificans]（39%）	True Positive	Yes
>NODE_1261_length_5103_cov_6.647176_5#2650#4860#1#ID=1261_5	21229	736	portal protein [Bosea sp. BIWAKO-01]（57%）	True Positive	Yes
>NODE_1285_length_5054_cov_12.710986_5#2480#4933#-1#ID=1285_5	21401	817	phage portal protein [Deinococcus irradiatisoli]（29%）	True Positive	Yes
>NODE_1315_length_4990_cov_35.743438_3#2782#4797#-1#ID=1315_3	21639	671	putative structural lysozyme [Podoviridae sp. ctdb7] （27%）	Phage related
>NODE_1334_length_4954_cov_6.239188_3#1928#3157#-1#ID=1334_3	21774	409	phage portal protein [Nitrosomonas marina]（45%）	True Positive	Yes
>NODE_1364_length_4892_cov_7.635250_10#3659#4891#-1#ID=1364_10	22015	410	terminase [Ensifer adhaerens]（55%）	Phage related
>NODE_1390_length_4827_cov_6.695707_5#3199#4827#1#ID=1390_5	22192	543	putative portal protein [Prokaryotic dsDNA virus sp.]（41%）	True Positive
>NODE_1418_length_4781_cov_8.411815_2#1152#3203#1#ID=1418_2	22387	683	phage portal protein [Anoxybacillus]（28%）	True Positive	Yes
>NODE_1433_length_4760_cov_8.491142_5#1617#3875#1#ID=1433_5	22503	752	phage portal protein [Hyphomonas sp.]（37%）	True Positive
>NODE_1452_length_4728_cov_5.345369_8#3059#4657#1#ID=1452_8	22661	532	spry domain protein [uncultured Mediterranean phage uvDeep-CGR2-AD8-C175]（32%）	Phage related
>NODE_1478_length_4673_cov_17.306220_3#1998#3242#1#ID=1478_3	22821	414	phage portal protein [Nitrosomonas marina]（64%）	True Positive	Yes
>NODE_1482_length_4670_cov_12.230686_7#3076#4668#-1#ID=1482_7	22847	530	none	Unknown
>NODE_1493_length_4643_cov_9.628065_1#45#1736#-1#ID=1493_1	22912	563	phage portal protein [uncultured phage]（27%）	True Positive
>NODE_1499_length_4632_cov_7.761246_2#1311#3335#1#ID=1499_2	22944	674	hypothetical protein DRN43_04645 [Thermococci archaeon]（34%）	Phage related
>NODE_1525_length_4583_cov_4.542813_5#2479#4581#-1#ID=1525_5	23121	700	hypothetical protein A3E01_00250 [Gammaproteobacteria bacterium RIFCSPHIGHO2_12_FULL_63_22]（54%）	Unknown
>NODE_1552_length_4542_cov_7.946720_2#418#1884#-1#ID=1552_2	23307	488	hypothetical protein [Halomonas xianhensis]（57%）	Other function
>NODE_1564_length_4526_cov_5.454055_3#1846#2988#1#ID=1564_3	23409	380	phage portal protein [Sphingopyxis sp. MG]（63%）	True Positive	Yes
>NODE_1604_length_4464_cov_6.264981_2#152#1744#1#ID=1604_2	23665	530	putative portal protein [Prokaryotic dsDNA virus sp.]（30%）	True Positive	Yes
>NODE_1701_length_4295_cov_11.655450_3#2061#3707#-1#ID=1701_3	24400	548	none	Unknown
>NODE_1724_length_4270_cov_6.246722_3#2428#3999#-1#ID=1724_3	24571	523	hypothetical protein [Bordetella hinzii]（29%）	Phage related
>NODE_1744_length_4230_cov_6.353550_2#797#2311#1#ID=1744_2	24717	504	phage portal protein [Candidatus Promineofilum breve]（27%）	True Positive
>NODE_1815_length_4109_cov_6.653941_3#888#3065#1#ID=1815_3	25162	725	Phage P22-like portal protein [Noviherbaspirillum humi]（40%）	True Positive	Yes
>NODE_1849_length_4067_cov_69.030311_4#949#2733#-1#ID=1849_4	25372	594	portal protein [Freshwater phage uvFW-CGR-AMD-COM-C455]（44%）	True Positive	Yes
>NODE_1853_length_4063_cov_23.491474_4#2550#4061#1#ID=1853_4	25395	504	hypothetical protein UT24_C0020G0014 [Candidatus Woesebacteria bacterium GW2011_GWB1_39_12]（22%）	Phage related
>NODE_1891_length_4012_cov_10.312421_3#2380#4011#-1#ID=1891_3	25616	543	phage_portal_protein_[Bacillus_sp._UNCCL81]（28%）	True Positive	Yes
>NODE_1906_length_3996_cov_16.044121_2#667#2424#1#ID=1906_2	25701	585	hypothetical protein EHM40_21325 [Chloroflexi bacterium]（42%）	Unknown
>NODE_1939_length_3949_cov_23.792979_2#2236#3948#-1#ID=1939_2	25893	570	phage portal protein [Pseudoalteromonas spongiae]（30%）	True Positive	Yes
>NODE_1960_length_3925_cov_7.759221_3#1432#3570#-1#ID=1960_3	26021	712	phage portal protein [Falsochrobactrum sp. HN4]（37%）	True Positive	Yes
>NODE_1974_length_3918_cov_13.178506_3#425#2764#1#ID=1974_3	26085	779	phage portal protein [Marinitoga sp. 1137]（25%）	True Positive	Yes
>NODE_1990_length_3894_cov_38.336214_2#84#2222#-1#ID=1990_2	26184	712	portal protein [uncultured Mediterranean phage uvDeep-CGR2-KM22-C255]（36%）	True Positive	Yes
>NODE_2124_length_3742_cov_17.773384_2#732#1898#-1#ID=2124_2	26978	388	phage portal protein [Rhodocyclaceae bacterium]（38%）	True Positive	Yes
>NODE_2159_length_3712_cov_16.522409_1#1472#3349#-1#ID=2159_1	27194	625	transposase [Thermodesulfitimonas autotrophica]	Unknown
>NODE_2188_length_3687_cov_5.984773_3#804#2036#-1#ID=2188_3	27393	410	phage portal protein [Rubrivivax sp.]（58%）	True Positive	Yes
>NODE_2200_length_3678_cov_4.583680_2#787#2400#-1#ID=2200_2	27458	537	phage tail protein [Devosia sp. 66-22]（29%）	Phage related
>NODE_2243_length_3645_cov_9.846218_2#923#2875#1#ID=2243_2	27696	650	phage major capsid protein [Ammonifex sp.]（50%）	Phage related
>NODE_2253_length_3637_cov_4.870578_2#449#1993#-1#ID=2253_2	27757	514	phage portal protein [Planctopirus hydrillae]（42%）	True Positive
>NODE_2255_length_3634_cov_82.046642_1#3#1784#-1#ID=2255_1	27769	594	hypothetical protein D4R39_02335 [Methylophilaceae bacterium]（46%）	Phage related
>NODE_2274_length_3623_cov_4.876550_3#2078#3622#1#ID=2274_3	27879	515	hypothetical protein B6D45_05175 [Ignavibacteriales bacterium UTCHB3]（27%）	Phage related
>NODE_2384_length_3533_cov_5.312030_1#2#1354#1#ID=2384_1	28490	450	phage portal protein [Streptomyces sp. 3212.3]（43%）	True Positive	Yes
>NODE_2424_length_3491_cov_11.304742_3#1701#2891#1#ID=2424_3	28709	396	phage portal protein [Streptomyces sp. NRRL B-1381]（33%）	True Positive	Yes
>NODE_2455_length_3472_cov_3.998528_5#1471#3471#1#ID=2455_5	28904	667	Portal protein [Burkholderia virus Bcepmigl]（41%）	True Positive	Yes
>NODE_2468_length_3460_cov_5.716396_4#951#2300#1#ID=2468_4	28966	449	phage portal protein [Pedobacter sp.]（21%）	True Positive
>NODE_2491_length_3438_cov_7.348201_2#621#2798#1#ID=2491_2	29095	725	portal protein [uncultured Mediterranean phage uvMED]（36%）	True Positive	Yes
>NODE_2509_length_3424_cov_5.640490_2#210#1529#-1#ID=2509_2	29195	439	phage portal protein [Lechevalieria deserti]（55%）	True Positive	Yes
>NODE_2582_length_3371_cov_8.042476_3#896#2941#-1#ID=2582_3	29590	681	putative portal protein [Prokaryotic dsDNA virus sp.]（38%）	True Positive
>NODE_2729_length_3270_cov_5.722692_3#1144#3120#-1#ID=2729_3	30360	658	hypothetical protein [Variovorax sp. JS1663]（44%）	Phage related	Yes
>NODE_2776_length_3230_cov_56.254200_5#1403#2884#-1#ID=2776_5	30591	493	ATP/GTP binding protein [Streptomyces coelicolor A3(2)]（37%）	Other function
>NODE_2877_length_3167_cov_6.051423_1#2#1843#-1#ID=2877_1	31104	614	phage portal protein [Blastopirellula marina]（37%）	True Positive
>NODE_2893_length_3156_cov_6.962674_4#1551#3155#1#ID=2893_4	31202	535	phage portal protein [Planctomycetes bacterium]（26%）	True Positive
>NODE_2936_length_3123_cov_5.928806_1#182#2470#1#ID=2936_1	31411	762	phage portal protein [Rhizobiales bacterium]（38%）	True Positive
>NODE_2976_length_3098_cov_135.653986_2#1056#3098#-1#ID=2976_2	31629	680	portal protein [Providencia rettgeri]（38%）	True Positive	Yes
>NODE_3013_length_3080_cov_5.078203_2#217#1977#-1#ID=3013_2	31826	586	phage portal protein [Ruminiclostridium papyrosolvens]（31%）	True Positive	Yes
>NODE_3026_length_3073_cov_9.619413_1#2#1651#1#ID=3026_1	31874	549	hypothetical protein [Candidatus Pacearchaeota archaeon]（30%）	Unknown
>NODE_3030_length_3071_cov_5.065087_1#1#1629#1#ID=3030_1	31900	542	phage major capsid protein [Aurantimonas manganoxydans]（27%）	Phage related
>NODE_3036_length_3065_cov_21.568896_2#806#3064#-1#ID=3036_2	31930	752	hypothetical protein [Paracoccus versutus]（31%）	Unknown
>NODE_3186_length_2986_cov_5.782205_1#1#1617#1#ID=3186_1	32656	538	Phage protein [Bacillus thuringiensis serovar israelensis ATCC 35646]（25%）	Phage related
>NODE_3191_length_2984_cov_12.557580_2#140#1240#1#ID=3191_2	32671	366	tail fiber protein [Agrobacterium phage Atu_ph07]（46%）	Phage related
>NODE_3322_length_2917_cov_5.796622_2#1367#2917#1#ID=3322_2	33324	517	putative portal protein [Prokaryotic dsDNA virus sp.]（27%）	True Positive
>NODE_3629_length_2780_cov_63.563771_2#1089#2780#1#ID=3629_2	34769	564	(p)ppGpp synthetase I [uncultured Mediterranean phage uvMED]（52%）	Phage related
>NODE_3644_length_2773_cov_7.710897_3#1008#2546#1#ID=3644_3	34833	512	TerL protein [Cupriavidus taiwanensis]（68%）	Phage related
>NODE_3669_length_2766_cov_8.198439_2#213#2279#1#ID=3669_2	34952	688	portal protein [Providencia rettgeri]（41%）	True Positive	Yes
>NODE_3756_length_2728_cov_6.502827_2#281#1471#1#ID=3756_2	35340	396	phage portal protein [Thermanaeromonas toyohensis]（25%）	True Positive	Yes
>NODE_3801_length_2705_cov_15.115209_2#785#2704#-1#ID=3801_2	35552	639	hypothetical protein [Dinghuibacter silviterrae]（26%）	Unknown
>NODE_3819_length_2700_cov_5.262095_3#967#2700#-1#ID=3819_3	35646	577	hypothetical protein COX49_05925 [bacterium (Candidatus Stahlbacteria) CG23_combo_of_CG06-09_8_20_14_all_40_9]（51%）	Phage related
>NODE_3854_length_2683_cov_4.665644_2#380#2599#1#ID=3854_2	35778	739	Head-tail connector protein [uncultured Mediterranean phage uvMED]（35%）	True Positive
>NODE_4137_length_2570_cov_5.949499_3#812#2296#1#ID=4137_3	37042	494	phage portal protein [Bacteriodetes bacterium]（25%）	True Positive
>NODE_4372_length_2485_cov_5.753112_2#574#2484#1#ID=4372_2	38066	637	putative portal protein [Puniceispirillum phage HMO-2011]（22%）	True Positive
>NODE_4429_length_2465_cov_5.461925_1#181#1611#1#ID=4429_1	38307	476	portal protein [Freshwater phage uvFW-CGR-AMD-COM-C203]（44%）	True Positive	Yes
>NODE_4523_length_2436_cov_6.704786_3#934#2436#1#ID=4523_3	38723	501	phage portal protein [Dehalococcoidia bacterium]（44%）	True Positive	Yes
>NODE_4541_length_2428_cov_9.419465_2#273#2231#1#ID=4541_2	38802	652	hypothetical protein CVU22_08755 [Betaproteobacteria bacterium HGW-Betaproteobacteria-16]（37%）	Unknown
>NODE_4564_length_2421_cov_5.398124_4#1004#2419#1#ID=4564_4	38905	472	phage portal protein [Clostridium sp. OM05-9]（33%）	True Positive	Yes
>NODE_4651_length_2395_cov_36.925431_2#183#2381#1#ID=4651_2	39279	732	hypothetical protein [Chitinimonas koreensis]（35%）	Unknown
>NODE_4792_length_2357_cov_4.964943_1#1#1809#1#ID=4792_1	39843	602	Phage protein [Bacillus thuringiensis serovar israelensis ATCC 35646]（25%）	Phage related
>NODE_4870_length_2338_cov_7.504640_2#356#2338#-1#ID=4870_2	40170	660	putative portal protein [Prokaryotic dsDNA virus sp.] （38%）	True Positive	Yes
>NODE_4894_length_2331_cov_52.324468_1#59#2152#1#ID=4894_1	40268	697	putative portal protein [Prokaryotic dsDNA virus sp.] （39%）	True Positive	Yes
>NODE_4962_length_2313_cov_7.310992_2#276#1889#-1#ID=4962_2	40535	537	Lambda phage portal protein B [Shewanella oneidensis MR-1]（24%）	True Positive	Yes
>NODE_4991_length_2305_cov_5.643946_2#281#1465#-1#ID=4991_2	40654	394	virion structural protein [Myxococcus phage Mx8]（37%）	Phage related
>NODE_5016_length_2299_cov_4.444694_2#415#2298#-1#ID=5016_2	40757	627	hypothetical protein DIU65_13395 [Proteobacteria bacterium]（41%）	Unknown
>NODE_5034_length_2292_cov_7.117727_1#2#1618#1#ID=5034_1	40821	538	none	Phage related
>NODE_5090_length_2276_cov_4.072694_3#854#2194#-1#ID=5090_3	41031	446	phage portal protein [Pseudomonas putida]（54%）	True Positive	Yes
>NODE_5144_length_2260_cov_17.816476_2#144#2078#1#ID=5144_2	41243	644	phage major capsid protein [Acidimicrobiia bacterium]（44%）	Phage related
>NODE_5369_length_2200_cov_4.880941_1#2#1897#1#ID=5369_1	42105	631	hypothetical protein [Gammaproteobacteria bacterium]（33%）	Unknown
>NODE_5431_length_2184_cov_9.296823_2#242#1696#-1#ID=5431_2	42325	484	phage portal protein [Prauserella]（34%）	True Positive	Yes
>NODE_5590_length_2151_cov_5.102119_1#3#1226#-1#ID=5590_1	42909	408	phage portal protein [Aliiarcobacter faecis]（26%）	True Positive	Yes
>NODE_5625_length_2142_cov_27.938558_1#2#1969#-1#ID=5625_1	43046	656	hypothetical protein [Methylophaga sp.]（34%）	Unknown
>NODE_5676_length_2130_cov_8.195620_1#2#1669#-1#ID=5676_1	43242	556	putative portal protein [Prokaryotic dsDNA virus sp.]（25%）	True Positive
>NODE_5764_length_2109_cov_11.704523_1#3#1649#-1#ID=5764_1	43550	549	hypothetical protein EKK63_11540 [Acinetobacter sp.]（76%）	Unknown
>NODE_5830_length_2095_cov_9.683168_1#1#1698#-1#ID=5830_1	43781	566	hypothetical protein [Azoarcus tolulyticus]（54%）	Unknown
>NODE_5911_length_2078_cov_5.416875_3#618#2078#1#ID=5911_3	44068	487	portal protein [Serratia phage Parlo]（46%）	True Positive	Yes
>NODE_5939_length_2073_cov_7.643143_2#498#2072#-1#ID=5939_2	44182	524	phage tail tape measure protein [Cardiobacterium sp.]（30%）	Phage related
>NODE_5970_length_2067_cov_6.176205_1#1#1494#1#ID=5970_1	44289	497	phage portal protein [Curvibacter lanceolatus]（67%）	True Positive	Yes
>NODE_6101_length_2044_cov_4.955815_2#313#2043#-1#ID=6101_2	44767	576	hypothetical protein [Singulisphaera sp. GP187]（38%）	Unknown
>NODE_6313_length_2005_cov_10.907772_1#2#2005#1#ID=6313_1	45511	668	phage tail tape measure protein [Natronolimnobius sp. AArc1]（35%）	Phage related
>NODE_6453_length_1977_cov_3.748160_2#606#1925#1#ID=6453_2	45989	439	none	Unknown
>NODE_6524_length_1964_cov_7.207517_2#454#1632#-1#ID=6524_2	46246	392	PBSX family phage terminase, large subunit [Microgenomates group bacterium GW2011_GWC1_41_20]（63%）	Phage related
>NODE_6702_length_1932_cov_9.766290_2#620#1930#-1#ID=6702_2	46881	436	none	Other function
>NODE_7021_length_1875_cov_4.735000_1#3#1703#-1#ID=7021_1	47933	567	portal protein [Bosea sp. BIWAKO-01]（35%）	True Positive	Yes
>NODE_7081_length_1867_cov_6.385045_1#95#1867#1#ID=7081_1	48139	591	hypothetical protein SAMN05216316_1073 [Nitrosovibrio sp. Nv6]（48%）	Other function
>NODE_7127_length_1862_cov_4.565753_2#351#1862#-1#ID=7127_2	48279	503	phage/plasmid primase P4 family C-terminal domain protein [Clostridioides difficile]（31%）	Phage related
>NODE_7226_length_1848_cov_12.398195_1#111#1847#-1#ID=7226_1	48612	587	hypothetical protein C5B60_07670 [Chloroflexi bacterium]（30%）	Unknown
>NODE_7234_length_1847_cov_18.536682_2#224#1846#-1#ID=7234_2	48637	540	hypothetical protein DWQ39_02760 [Bacteroidetes bacterium]（26%）	Unknown
>NODE_7383_length_1826_cov_41.396916_1#3#1826#-1#ID=7383_1	49137	608	Uncharacterized conserved protein [Janthinobacterium sp. Marseille]（63%）	Unknown
>NODE_7710_length_1777_cov_35.767333_1#3#1673#-1#ID=7710_1	50208	557	none	Unknown
>NODE_7928_length_1748_cov_8.727436_1#3#1184#-1#ID=7928_1	50917	394	hypothetical protein A2V57_08750 [Candidatus Aminicenantes bacterium RBG_19FT_COMBO_65_30]（27%）	Phage related
>NODE_8051_length_1732_cov_4.888352_1#10#1731#1#ID=8051_1	51325	574	structural protein [Cellulophaga phage phi18:3]（26%）	Phage related
>NODE_8151_length_1718_cov_38.725502_1#18#1718#1#ID=8151_1	51630	576	none	Unknown
>NODE_8168_length_1717_cov_7.563946_1#3#1715#1#ID=8168_1	51681	571	putative portal protein [Prokaryotic dsDNA virus sp.]（44%）	True Positive	Yes
>NODE_8207_length_1713_cov_3.953602_1#2#1522#1#ID=8207_1	51815	506	putative portal protein [Prokaryotic dsDNA virus sp.]（20%）	True Positive
>NODE_8209_length_1712_cov_10.502749_1#2#1711#1#ID=8209_1	51819	570	DarB-like antirestriction protein [Burkholderia virus Bcepmigl]（69%）	Phage related
>NODE_8297_length_1699_cov_14.061576_1#2#1588#1#ID=8297_1	52089	528	bacteriophage head to tail connecting protein [Stenotrophomonas maltophilia]（57%）	True Positive
>NODE_8363_length_1691_cov_5.484530_1#1#1689#1#ID=8363_1	52291	563	FAD-dependent oxidoreductase [Gammaproteobacteria bacterium]（30%）	Unknown
>NODE_8456_length_1678_cov_11.827823_1#42#1562#-1#ID=8456_1	52573	506	phage portal protein [bacterium]（23%）	True Positive
>NODE_8584_length_1661_cov_6.252207_1#2#1660#1#ID=8584_1	52973	553	hypothetical protein [Candidatus Marinimicrobia bacterium]（30%）	Unknown
>NODE_8614_length_1658_cov_4.418193_1#1#1590#-1#ID=8614_1	53056	530	putative portal protein [Prokaryotic dsDNA virus sp.]（30%）	True Positive
>NODE_8664_length_1652_cov_3.680406_1#1#1650#1#ID=8664_1	53203	550	portal protein [Serratia phage Parlo]（23%）	True Positive
>NODE_8899_length_1625_cov_4.978710_1#3#1625#1#ID=8899_1	53861	541	hypothetical protein [Candidatus Pacearchaeota archaeon]（32%）	Unknown
>NODE_9049_length_1607_cov_3.800914_1#1#1605#1#ID=9049_1	54296	535	tail fiber-like protein [Synechococcus T7-like virus S-TIP37]（41%）	Phage related
>NODE_9065_length_1605_cov_4.752288_1#1#1605#-1#ID=9065_1	54348	535	mannose-1-phosphate guanylyltransferase [Leptospira haakeii]（30%）	Unknown
>NODE_9087_length_1603_cov_14.263089_1#3#1601#1#ID=9087_1	54416	533	phage tail tape measure protein [Planctomycetes bacterium]（29%）	Phage related
>NODE_9299_length_1582_cov_3.487724_1#1#1581#-1#ID=9299_1	55065	527	hypothetical protein B0A64_03790 [Flavobacterium araucananum]（31%）	Unknown
>NODE_9514_length_1558_cov_21.207687_1#53#1510#-1#ID=9514_1	55691	485	peptidylprolyl isomerase [Lentzea kentuckyensis](37%)	Unknown
>NODE_9563_length_1553_cov_5.528417_1#222#1553#1#ID=9563_1	55832	444	phage portal protein [Moorella](33%)	True Positive	Yes
>NODE_9804_length_1530_cov_4.647423_1#3#1529#1#ID=9804_1	56541	509	tail tape measure protein [Paenibacillus phage Tadhana](23%)	Phage related
>NODE_9857_length_1524_cov_4.481021_1#3#1523#1#ID=9857_1	56685	507	portal protein [Streptomyces phage Immanuel3](25%)	True Positive
>NODE_10192_length_1493_cov_14.753173_1#3#1493#-1#ID=10192_1	57660	497	hypothetical protein AT59_21945 [Aeromonas hydrophila AD9](31%)	Unknown
>NODE_10234_length_1491_cov_3.069209_1#3#1379#1#ID=10234_1	57788	458	hypothetical protein [Rhodoferax fermentans](23%)	Unknown
>NODE_10322_length_1483_cov_5.668324_1#2#1267#1#ID=10322_1	58048	421	portal (connector) protein [Vibrio phage ICP2_2013_A_Haiti]（49%）	True Positive	Yes
>NODE_10376_length_1478_cov_9.436921_1#1#1251#-1#ID=10376_1	58201	417	hypothetical protein EKK58_11645 [Candidatus Dependentiae bacterium](51%)	Unknown
>NODE_10405_length_1476_cov_3.800143_2#172#1476#1#ID=10405_2	58285	435	phage portal protein [Herpetosiphon geysericola](43%)	True Positive	Yes
>NODE_10717_length_1447_cov_24.885569_2#142#1386#-1#ID=10717_2	59157	414	phage portal protein [Nitrosomonas marina](62%)	True Positive	Yes
>NODE_10776_length_1442_cov_4.027067_1#3#1442#1#ID=10776_1	59319	480	portal protein [Serratia phage Parlo](51%)	True Positive	Yes
>NODE_11043_length_1419_cov_7.069196_1#1#1419#-1#ID=11043_1	60052	473	CDS55254.1_conserved_phage_mega_protein_[Polaromonas_sp._CG9_12](32%)	Phage related
>NODE_11650_length_1373_cov_4.174114_1#1#1338#1#ID=11650_1	61639	445	hypothetical protein [Bacteroidetes bacterium](46%)	Unknown
>NODE_11758_length_1365_cov_10.520155_1#6#1364#-1#ID=11758_1	61927	452	hypothetical protein [Actinobacteria bacterium](32%)	Unknown
>NODE_11949_length_1352_cov_5.901331_1#2#1351#1#ID=11949_1	62437	450	nucleoside hydrolase [Pedobacter sp.](29%)	Unknown
>NODE_12015_length_1347_cov_4.840409_1#2#1285#1#ID=12015_1	62616	427	phage portal protein [Bellilinea caldifistulae](51%)	True Positive	Yes
>NODE_12073_length_1343_cov_59.841483_1#3#1343#-1#ID=12073_1	62763	447	phage portal protein [Herpetosiphon geysericola](45%)	True Positive	Yes
>NODE_12268_length_1331_cov_10.252389_1#63#1289#-1#ID=12268_1	63288	408	phage portal protein [Rickettsiales endosymbiont of Stachyamoeba lipophora](35%)	True Positive	Yes
>NODE_12355_length_1327_cov_4.076677_1#2#1327#-1#ID=12355_1	63501	442	hypothetical protein [Janthinobacterium sp. Marseille](44%)	Unknown
>NODE_13168_length_1274_cov_6.586322_1#3#1274#-1#ID=13168_1	65598	424	TonB-dependent receptor [Flavihumibacter petaseus](27%)	Unknown
>NODE_13270_length_1267_cov_3.753356_1#2#1267#1#ID=13270_1	65842	422	hypothetical protein EPN60_12730 [Sinobacteraceae bacterium](50%)	Unknown
>NODE_13421_length_1258_cov_3.735418_1#2#1066#-1#ID=13421_1	66226	355	Lambda phage portal protein B [Shewanella oneidensis MR-1](29%)	True Positive	Yes
>NODE_13524_length_1252_cov_3.745115_1#1#1251#1#ID=13524_1	66491	417	laminin subunit alpha-1-like [Nicrophorus vespilloides] (20%)	Unknown
>NODE_14066_length_1222_cov_13.602441_1#3#1220#1#ID=14066_1	67814	406	hypothetical protein [uncultured marine virus](25%)	Phage related
>NODE_14793_length_1184_cov_2.874662_1#28#1182#1#ID=14793_1	69594	385	hypothetical protein [Candidatus Arthromitus sp. SFB-mouse-NL](42%)	Unknown
>NODE_15001_length_1172_cov_4.939836_1#2#1171#-1#ID=15001_1	70089	390	hypothetical protein COY32_06975 [candidate division WWE3 bacterium CG_4_10_14_0_2_um_filter_41_14](29%)	Unknown
>NODE_15169_length_1164_cov_3.880624_1#1#1164#1#ID=15169_1	70489	388	hypothetical protein [Halomonas xianhensis](37%)	Unknown
>NODE_15450_length_1151_cov_39.682156_1#3#1151#1#ID=15450_1	71160	383	Head-tail connector protein [uncultured Mediterranean phage uvMED](29%)	True Positive
>NODE_17174_length_1076_cov_3.596404_1#2#1075#1#ID=17174_1	75188	358	T9SS type A sorting domain-containing protein [Aureitalea sp. RR4-38](35%)	Unknown
>NODE_17522_length_1063_cov_3.477733_1#3#1061#-1#ID=17522_1	76009	353	portal protein [Bosea sp. BIWAKO-01](42%)	True Positive	Yes
>NODE_10_length_53172_cov_35.791589_53#33258#34745#-1#ID=10_53	859	459	phage portal protein [Planctomycetes bacterium]（36%）	True Positive
>NODE_25_length_43144_cov_14.112610_56#31947#33548#-1#ID=25_56	1875	533	DUF1073 domain-containing protein [Desulfovibrio sp. 6_1_46AFAA]（28%）	Phage related	Yes
>NODE_38_length_39957_cov_12.825962_56#37682#39292#1#ID=38_56	2674	536	Phage portal protein, lambda family [Planctomyces sp. SH-PL14]（35%）	True Positive
>NODE_94_length_27224_cov_14.760949_10#7501#9087#-1#ID=94_10	5366	528	phage portal protein [Planctomycetes bacterium]（45%）	True Positive
>NODE_103_length_25656_cov_16.351863_1#2#2254#1#ID=103_1	5711	750	portal protein [Klebsiella phage SopranoGao]（47%）	True Positive	Yes
>NODE_104_length_25435_cov_52.056664_18#12276#13919#1#ID=104_18	5765	547	phage head-tail adapter protein [Pandoraea apista]（53%）	True Positive
>NODE_117_length_23177_cov_43.147347_26#17160#18692#-1#ID=117_26	6206	510	phage portal protein [Rickettsiales bacterium]（37%）	True Positive	Yes
>NODE_143_length_20337_cov_12.047824_19#13731#15125#-1#ID=143_19	7005	464	phage portal protein [Chitinophaga pinensis]（32%）	True Positive
>NODE_272_length_13519_cov_12.222999_1#3#1298#-1#ID=272_1	9868	432	phage portal protein [Alphaproteobacteria bacterium 64-11]（25%）	True Positive
>NODE_301_length_12496_cov_7.377103_7#4231#5691#1#ID=301_7	10406	486	phage portal protein [Dysgonomonas sp. BGC7]（27%）	True Positive
>NODE_329_length_11839_cov_7.458858_17#8859#10280#1#ID=329_17	10878	473	phage portal protein [Arachidicoccus rhizosphaerae]（33%）	True Positive	Yes
>NODE_339_length_11647_cov_15.101193_2#149#1693#1#ID=339_2	11053	514	phage portal protein [Isosphaera pallida]（49%）	True Positive	Yes
>NODE_411_length_10408_cov_7.873415_16#8849#10408#-1#ID=411_16	12239	519	phage portal protein [Candidatus Promineofilum breve]（40%）	True Positive
>NODE_506_length_9107_cov_11.251771_14#7534#9105#1#ID=506_14	13682	524	hypothetical protein UX38_C0013G0014 [Microgenomates group bacterium GW2011_GWC1_46_16]（31%）	Phage related
>NODE_532_length_8737_cov_17.255484_4#2864#4306#1#ID=532_4	13992	480	portal protein [Bacillus phage Leo2]（28%）	True Positive	Yes
>NODE_648_length_7704_cov_118.389959_3#2057#3277#1#ID=648_3	15372	406	phage portal protein [Amycolatopsis azurea]（54%）	True Positive	Yes
>NODE_668_length_7508_cov_21.608368_3#1917#3089#1#ID=668_3	15636	390	phage portal protein [Saccharopolyspora antimicrobica]（54%）	True Positive	Yes
>NODE_708_length_7170_cov_17.991966_6#3511#4725#-1#ID=708_6	16085	404	phage portal protein [Propionibacteriaceae bacterium NML 030167]（32%）	True Positive	Yes
>NODE_716_length_7110_cov_5.355224_4#1114#2661#-1#ID=716_4	16152	515	phage portal protein [Planctomycetes bacterium]（41%）	True Positive
>NODE_796_length_6669_cov_38.271762_4#2108#3697#1#ID=796_4	17040	529	replicative DNA helicase [Thermotoga maritima MSB8]（33%）	Phage related
>NODE_857_length_6437_cov_9.656240_4#2015#4144#-1#ID=857_4	17660	709	portal protein [uncultured Mediterranean phage uvMED]（38%）	True Positive	Yes
>NODE_877_length_6332_cov_10.801662_3#1455#2714#1#ID=877_3	17840	419	hypothetical protein A3E01_00185 [Gammaproteobacteria bacterium RIFCSPHIGHO2_12_FULL_63_22]（50%）	Other function
>NODE_1124_length_5430_cov_5.236415_3#1550#2818#1#ID=1124_3	20048	422	phage portal protein [Planctomycetes bacterium]（24%）	True Positive
>NODE_1144_length_5383_cov_9.289563_4#1388#2884#1#ID=1144_4	20234	498	phage portal protein [Planctopirus hydrillae]（40%）	True Positive
>NODE_1188_length_5288_cov_6.347401_4#1849#3321#1#ID=1188_4	20604	490	DUF4055 domain-containing protein [Pseudomonas lutea]（51%）	Phage related	Yes
>NODE_1316_length_4987_cov_11.012215_7#3659#4987#1#ID=1316_7	21647	443	phage portal protein [Candidatus Saccharimonas sp.]（57%）	True Positive	Yes
>NODE_1341_length_4943_cov_13.882087_3#1740#3017#-1#ID=1341_3	21832	425	phage portal protein [Azohydromonas lata]（51%）	True Positive	Yes
>NODE_1389_length_4828_cov_22.199032_3#2200#3528#1#ID=1389_3	22184	442	phage portal protein [Petroclostridium xylanilyticum]（38%）	True Positive	Yes
>NODE_1392_length_4822_cov_13.204550_3#1422#3065#-1#ID=1392_3	22201	547	hypothetical protein D6798_00160 [Deltaproteobacteria bacterium]（28%）	Phage related
>NODE_1464_length_4712_cov_56.719431_5#3078#4424#1#ID=1464_5	22735	448	phage portal protein [Hydrogenobacter thermophilus]（34%）	True Positive
>NODE_1562_length_4530_cov_4.500786_8#2903#4528#1#ID=1562_8	23397	542	hypothetical protein CGW95_12235 [Phenylobacterium zucineum]（42%）	Phage related
>NODE_1641_length_4392_cov_32.507065_5#2801#4336#1#ID=1641_5	23930	511	portal protein [Microcystis phage Me-ZS1]（25%）	True Positive
>NODE_1710_length_4288_cov_7.852836_3#973#2397#-1#ID=1710_3	24453	474	phage portal protein [Desulfonatronum thioautotrophicum]（37%）	True Positive
>NODE_1810_length_4122_cov_7.967383_3#2074#3594#1#ID=1810_3	25138	506	phage head morphogenesis protein [Geobacillus stearothermophilus]（28%）	Phage related
>NODE_1813_length_4116_cov_12.793615_2#74#1324#1#ID=1813_2	25151	416	phage portal protein [Cupriavidus sp. USMAA1020]（74%）	True Positive	Yes
>NODE_1866_length_4041_cov_7.801059_2#1858#3336#-1#ID=1866_2	25473	492	phage portal protein [Streptomyces sp. NBRC 110611]（51%）	True Positive	Yes
>NODE_2325_length_3579_cov_10.759703_1#1#1287#1#ID=2325_1	28183	428	none	Phage related
>NODE_2661_length_3310_cov_4.476352_3#2077#3309#1#ID=2661_3	29998	411	phage portal protein [Mahella australiensis]（59%）	True Positive	Yes
>NODE_2731_length_3268_cov_20.796430_1#31#1416#-1#ID=2731_1	30367	461	portal protein [Bacillus phage Leo2](27%)	True Positive	Yes
>NODE_3298_length_2932_cov_11.757088_3#631#2097#1#ID=3298_3	33216	488	phage portal protein [Methylobacter marinus]（44%）	True Positive	Yes
>NODE_3429_length_2867_cov_5.398997_3#1546#2775#-1#ID=3429_3	33843	409	phage portal protein [Mesorhizobium sp.]（74%）	True Positive	Yes
>NODE_3437_length_2863_cov_5.635940_1#3#1625#1#ID=3437_1	33875	540	hypothetical protein [Sphingomonas sp. Leaf23]（40%）	Unknown
>NODE_3541_length_2817_cov_9.706783_3#1167#2501#-1#ID=3541_3	34358	444	phage portal protein [Acidimicrobiia bacterium]（62%）	True Positive	Yes
>NODE_4000_length_2627_cov_5.830329_2#1072#2499#1#ID=4000_2	36440	475	phage portal protein [Streptomyces sp. NRRL S-378]（38%）	True Positive	Yes
>NODE_4091_length_2591_cov_7.262321_2#816#2426#-1#ID=4091_2	36826	536	hypothetical protein CUN56_12200 [Candidatus Thermofonsia Clade 2 bacterium] （38%）	Unknown
>NODE_4329_length_2502_cov_35.703337_1#3#1457#-1#ID=4329_1	37887	485	hypothetical protein [Arenimonas sp.]（30%）	Unknown
>NODE_4777_length_2361_cov_7.810149_2#780#2339#-1#ID=4777_2	39785	519	phage portal protein [Zavarzinella formosa]（50%）	True Positive	Yes
>NODE_4823_length_2350_cov_61.040440_3#663#2168#-1#ID=4823_3	39977	501	hypothetical protein [Myxococcales bacterium]（45%）	Unknown
>NODE_4954_length_2314_cov_15.901742_3#888#2312#1#ID=4954_3	40503	475	phage portal protein [Planctomycetes bacterium]（41%）	True Positive
>NODE_5036_length_2291_cov_17.947653_1#29#1522#-1#ID=5036_1	40824	497	helix-turn-helix DNA binding domain protein [Mycobacterium phage Avocado]（32%）	Phage related
>NODE_5109_length_2270_cov_4.958087_1#1#1167#-1#ID=5109_1	41111	389	phage portal protein [Mycobacterium sp. UM_WWY](64%）	True Positive	Yes
>NODE_5330_length_2209_cov_18.049203_2#691#2208#-1#ID=5330_2	41942	505	hypothetical protein AKJ09_03672 [Labilithrix luteola]（29%）	Unknown
>NODE_5331_length_2209_cov_16.135895_2#691#2208#-1#ID=5331_2	41944	505	hypothetical protein AKJ09_00043 [Labilithrix luteola]（29%）	Unknown
>NODE_5388_length_2195_cov_6.349528_2#533#2017#1#ID=5388_2	42176	494	hypothetical protein C5B51_17260 [Solibacteres bacterium]（24）	Unknown
>NODE_5546_length_2160_cov_6.533333_1#70#1614#1#ID=5546_1	42747	514	phage portal protein [Isosphaera pallida]（46%）	True Positive	Yes
>NODE_5641_length_2138_cov_6.438682_1#3#1469#-1#ID=5641_1	43102	489	none	Unknown
>NODE_5738_length_2117_cov_4.041626_1#1#1422#-1#ID=5738_1	43471	474	nucleoside triphosphate pyrophosphohydrolase [Chloroflexi bacterium]（28%）	Unknown
>NODE_6297_length_2009_cov_16.234230_2#503#1939#-1#ID=6297_2	45463	478	hypothetical protein [Pseudobacteroides cellulosolvens]（36%）	Unknown
>NODE_6725_length_1929_cov_4.483819_2#181#1800#1#ID=6725_2	46953	539	portal protein [Freshwater phage uvFW-CGR-AMD-COM-C203]（23%）	True Positive
>NODE_6734_length_1927_cov_6.761879_2#187#1602#-1#ID=6734_2	46981	471	bifunctional demethylmenaquinone methyltransferase/2-methoxy-6-polyprenyl-1,4-benzoquinol methylase UbiE [Amphritea balenae]（35%）	Unknown
>NODE_7179_length_1855_cov_12.149438_1#3#1460#-1#ID=7179_1	48463	486	tape measure protein [Gordonia phage Dorito]（40%）	Phage related
>NODE_7866_length_1758_cov_5.497326_2#86#1528#-1#ID=7866_2	50717	480	phage portal protein [Isosphaera pallida]（71%）	True Positive	Yes
>NODE_8206_length_1713_cov_6.970696_1#3#1364#1#ID=8206_1	51813	453	portal protein [Arthrobacter phage Wheelbite]（41%）	True Positive	Yes
>NODE_8309_length_1697_cov_5.458076_1#68#1360#-1#ID=8309_1	52128	430	none	Unknown
>NODE_8493_length_1673_cov_4.568836_1#3#1538#-1#ID=8493_1	52680	512	hypothetical protein UT24_C0020G0014 [Candidatus Woesebacteria bacterium GW2011_GWB1_39_12]（43%）	Unknown
>NODE_10039_length_1508_cov_11.191207_2#98#1363#-1#ID=10039_2	57213	421	phage portal protein [Nitrolancea hollandica]（50%）	True Positive	Yes
>NODE_10108_length_1501_cov_17.985975_1#78#1499#1#ID=10108_1	57403	474	phage portal protein [uncultured marine virus]（42%）	True Positive
>NODE_10109_length_1501_cov_14.247546_2#163#1455#-1#ID=10109_2	57405	430	phage portal protein [Paracoccus sanguinis]（30%）	True Positive	Yes
>NODE_10453_length_1471_cov_67.130372_1#2#1471#1#ID=10453_1	58425	490	coil containing protein [Vibrio phage 1.232.O._10N.261.51.E11]（44%）	Phage related
>NODE_11704_length_1369_cov_6.807573_1#1#1368#-1#ID=11704_1	61784	456	hypothetical protein [Pseudomonas songnenensis]（63%）	Phage related	Yes
>NODE_11877_length_1358_cov_3.561964_1#2#1357#-1#ID=11877_1	62265	452	phage portal protein [Herpetosiphon geysericola]（38%）	True Positive
>NODE_12543_length_1314_cov_2.964487_1#3#1265#-1#ID=12543_1	63998	421	TIGR04372 family glycosyltransferase [Desulfovibrio fairfieldensis]（58%）	Other function
>NODE_13185_length_1273_cov_3.833890_2#67#1272#1#ID=13185_2	65636	402	phage portal protein [Chromobacterium subtsugae]（40%）	True Positive	Yes
>NODE_13401_length_1259_cov_4.149493_1#2#1258#-1#ID=13401_1	66180	419	phage portal protein [Planctomycetes bacterium]（44%）	True Positive	Yes
>NODE_14042_length_1223_cov_11.609756_1#3#1223#1#ID=14042_1	67755	407	hypothetical protein HRbin40_00431 [bacterium HR40]（36%）	Unknown
>NODE_14076_length_1222_cov_3.337402_2#73#1221#1#ID=14076_2	67832	383	hypothetical protein EOO96_31410 [Pedobacter sp.]（72%）	Unknown
TerS
>NODE_9_length_58459_cov_8.258358_67#46790#47320#-1#ID=9_67	786	176	hypothetical protein EPN91_00835 [Salinibacterium sp.]（31%）	Phage related
>NODE_11_length_51962_cov_9.943435_39#35177#35701#-1#ID=11_39	932	174	hypothetical protein CBC91_06915 [Rickettsiales bacterium TMED131]（32%）	Phage related
>NODE_12_length_51142_cov_19.654454_21#11621#12052#1#ID=12_21	972	143	hypothetical protein EKK58_11745 [Candidatus Dependentiae bacterium]（34%）	Phage related
>NODE_13_length_49876_cov_84.913958_4#2348#2848#1#ID=13_4	1029	166	YP_009623843.1_T4-like_phage_baseplate_hub_+_tail_lysozyme_[Yersinia_phage_fHe-Yen9-04]（33%）	Phage related
>NODE_28_length_42269_cov_32.287837_48#39684#40256#-1#ID=28_48	2084	190	terminase small subunit [Aliidiomarina maris]（41%）	True Positive	Yes
>NODE_37_length_39999_cov_21.510044_48#37976#38479#-1#ID=37_48	2613	167	cathepsin L1-like [Nothoprocta perdicaria]（40%）	Phage related
>NODE_46_length_38482_cov_28.869737_5#2473#3048#1#ID=46_5	3076	191	DUF559 domain-containing protein [Azospirillum sp. TSA6c]（39%）	Phage related
>NODE_47_length_37987_cov_30.081214_3#1226#1723#-1#ID=47_3	3132	165	ATP-dependent metallopeptidase FtsH/Yme1/Tma family protein [Prevotella falsenii]（22%）	Phage related
>NODE_52_length_37150_cov_17.998463_11#12262#12825#-1#ID=52_11	3430	187	hypothetical protein D8B38_02350 [Candidatus Saccharimonas sp.]（39%）	Phage related
>NODE_55_length_36557_cov_82.741982_42#26951#27502#-1#ID=55_42	3638	183	putative HNH endonuclease [Bacillus phage BCP8-2]（32%）	Phage related
>NODE_56_length_36465_cov_10.915114_64#35877#36464#-1#ID=56_64	3721	195	hypothetical protein RADP37_05404 [Roseomonas mucosa]（67%）	Phage related
>NODE_70_length_33168_cov_14.792464_5#1581#2144#-1#ID=70_5	4343	187	hypothetical protein [Phycisphaerales bacterium]（31%）	Phage related
>NODE_75_length_32290_cov_24.355890_15#10284#10880#1#ID=75_15	4570	198	hypothetical protein BE20_24895 [Sorangium cellulosum]（28%）	Phage related
>NODE_75_length_32290_cov_24.355890_34#23711#24268#1#ID=75_34	4589	185	none	Phage related
>NODE_88_length_28776_cov_6.877426_40#27433#27885#-1#ID=88_40	5141	150	none	Phage related
>NODE_119_length_22930_cov_7.316517_13#5087#5614#-1#ID=119_13	6258	175	hypothetical protein SppYZU01_44 [Shewanella phage SppYZU01]（28%）	Phage related
>NODE_135_length_21176_cov_74.827686_15#8939#9496#1#ID=135_15	6758	185	none	Phage related
>NODE_138_length_20715_cov_25.978634_9#4716#5321#-1#ID=138_9	6836	201	hypothetical protein A2X49_10035 [Lentisphaerae bacterium GWF2_52_8]（32%）	Phage related
>NODE_143_length_20337_cov_12.047824_23#19277#19771#-1#ID=143_23	7009	164	terminase small subunit [Bacteroidetes bacterium HGW-Bacteroidetes-4]（43%）	True Positive	Yes
>NODE_144_length_20260_cov_30.637404_20#9747#10304#1#ID=144_20	7030	185	terminase small subunit [Acinetobacter sp. Root1280]（30%）	True Positive
>NODE_158_length_19725_cov_7.246463_10#6208#6714#-1#ID=158_10	7441	168	hypothetical protein [Maribacter sp.]（34%）	Phage related
>NODE_164_length_19140_cov_7.385523_16#13558#14001#-1#ID=164_16	7627	147	terminase small subunit [Ralstonia phage GP4]（38%）	True Positive	Yes
>NODE_170_length_18461_cov_47.415969_28#16721#17203#-1#ID=170_28	7785	160	phage protein [Streptococcus pyogenes](38%)	Phage related
>NODE_171_length_18361_cov_10.855244_15#6413#6958#1#ID=171_15	7803	181	terminase small subunit protein [Pseudochrobactrum sp. B5](44%)	True Positive
>NODE_175_length_17951_cov_60.055717_19#11243#11806#1#ID=175_19	7896	187	none	Phage related
>NODE_184_length_17487_cov_28.449173_8#8906#9436#1#ID=184_8	8122	176	none	Phage related
>NODE_216_length_15591_cov_14.439482_3#992#1507#-1#ID=216_3	8803	171	HNH endonuclease [Microcystis aeruginosa]（48%）	Phage related
>NODE_258_length_13951_cov_52.009152_17#6009#6548#-1#ID=258_17	9615	179	terminase small subunit protein [Pseudochrobactrum sp. B5](30%)	True Positive
>NODE_285_length_12969_cov_14.651156_12#8559#9164#1#ID=285_12	10097	201	3-oxoacyl-[acyl-carrier-protein] synthase, mitochondrial [Vombatus ursinus](30%)	Phage related
>NODE_295_length_12750_cov_119.277081_8#4685#5278#-1#ID=295_8	10285	197	none	Phage related
>NODE_313_length_12300_cov_16.469939_4#1297#1887#-1#ID=313_4	10587	196	none	Other function
>NODE_319_length_12145_cov_14.205220_17#8162#8686#-1#ID=319_17	10714	174	GIY-YIG nuclease family protein [Mycolicibacter longobardus](36%)	Phage related
>NODE_323_length_11984_cov_129.787220_15#10387#10872#-1#ID=323_15	10799	161	GTP-binding protein [Leptolyngbya sp. Heron Island J](28%)	Unknown
>NODE_326_length_11927_cov_18.008944_5#4543#5028#1#ID=326_5	10832	161	hypothetical protein K435DRAFT_970008 [Dendrothele bispora CBS 962.96](26%)	Phage related
>NODE_357_length_11214_cov_42.288087_17#10507#11043#-1#ID=357_17	11370	178	hypothetical protein [gamma proteobacterium IMCC1989](47%)	Phage related
>NODE_375_length_10919_cov_14.333272_4#3991#4599#-1#ID=375_4	11657	202	hypothetical protein [Pseudomonas sp. ENNP23](52%)	Phage related	Yes
>NODE_380_length_10861_cov_7.520490_9#8606#9109#-1#ID=380_9	11760	167	hypothetical protein EKK39_04730 [Sphingobacteriales bacterium](39%)	Phage related
>NODE_395_length_10708_cov_8.356908_1#2#628#1#ID=395_1	11989	208	hypothetical protein B7Z73_05695 [Planctomycetia bacterium 21-64-5](42%)	Unknown
>NODE_418_length_10319_cov_27.971203_13#8532#9149#-1#ID=418_13	12333	205	HNH endonuclease domain protein [Parcubacteria group bacterium GW2011_GWF1_40_6](45%)	Phage related
>NODE_470_length_9514_cov_6.282975_3#682#1200#1#ID=470_3	13126	172	hypothetical protein [Verrucomicrobium sp. BvORR106](32%)	Other function
>NODE_492_length_9296_cov_7.228609_5#3113#3625#1#ID=492_5	13481	170	M15 family metallopeptidase [Rhizobiales bacterium](48%)	Phage related
>NODE_503_length_9125_cov_16.619448_20#5916#6455#-1#ID=503_20	13634	179	hypothetical protein EHM34_00285 [Nitrosopumilales archaeon](29%)	Phage related
>NODE_549_length_8617_cov_5.653243_11#7124#7654#1#ID=549_11	14269	179	none	Phage related
>NODE_577_length_8302_cov_7.251246_4#774#1370#1#ID=577_4	14581	198	hypothetical protein [Aeromonas caviae](39%)	Unknown
>NODE_577_length_8302_cov_7.251246_14#7732#8301#-1#ID=577_14	14591	189	hypothetical protein VN12_26410 [Pirellula sp. SH-Sr6A](35%)	Unknown
>NODE_593_length_8144_cov_5.798240_2#1907#2524#1#ID=593_2	14764	205	prophage protein [Lactococcus lactis subsp. lactis](32%)	Phage related
>NODE_635_length_7754_cov_16.871598_12#6630#7190#-1#ID=635_12	15240	186	glycosyltransferase family 4 protein [Parachlamydia acanthamoebae](34%)	Other function
>NODE_702_length_7222_cov_21.293969_4#1881#2375#1#ID=702_4	16003	164	DnaJ domain-containing protein [[Haemophilus] felis](52%)	Phage related
>NODE_761_length_6886_cov_33.365145_10#5204#5737#1#ID=761_10	16679	177	phage tail protein [Salmonella enterica](37%)	Phage related
>NODE_764_length_6878_cov_10.987800_7#5533#6102#-1#ID=764_7	16703	189	terminase small subunit [Rhizobium pusense](43%)	True Positive
>NODE_773_length_6829_cov_10.452028_8#2937#3686#-1#ID=773_8	16808	249	DUF1376 domain-containing protein [Comamonas testosteroni](69%)	Other function
>NODE_857_length_6437_cov_9.656240_1#3#593#-1#ID=857_1	17657	197	head protein [candidate division NC10 bacterium](70%)	Phage related
>NODE_881_length_6319_cov_16.000000_7#4903#5463#1#ID=881_7	17880	186	phage gp6-like head-tail connector protein [Streptomyces sp. CB02009](38%)	Phage related
>NODE_925_length_6146_cov_10.814858_10#4537#5067#1#ID=925_10	18298	176	hypothetical protein [uncultured Mediterranean phage uvDeep-CGR2-KM19-C37](55%)	Phage related
>NODE_994_length_5878_cov_24.241082_3#1708#2337#-1#ID=994_3	18890	209	hypothetical protein [Janthinobacterium sp. B9-8](36%)	Phage related
>NODE_1045_length_5673_cov_7.473562_3#1129#1707#1#ID=1045_3	19371	192	sigma-70 family RNA polymerase sigma factor [Bacteroidetes bacterium](28%)	Phage related
>NODE_1113_length_5468_cov_6.356388_5#4756#5325#1#ID=1113_5	19959	189	uncharacterized protein FPRN_02141 [Fusarium proliferatum](40%)	Phage related
>NODE_1184_length_5291_cov_23.069977_1#1#546#-1#ID=1184_1	20553	182	type IV secretion system DNA-binding domain-containig protein [Pseudomonas aeruginosa](38%)	Unknown
>NODE_1237_length_5159_cov_9.825334_4#3400#3975#-1#ID=1237_4	20996	191	DUF4065 domain-containing protein [bacterium RmlP026](31%)	Other function
>NODE_1310_length_5001_cov_5.847544_8#3229#3819#1#ID=1310_8	21608	196	none	Unknown
>NODE_1327_length_4972_cov_132.056769_3#4313#4972#-1#ID=1327_3	21719	219	tail fiber protein [Acidovorax phage ACPWH](61%)	Phage related
>NODE_1394_length_4821_cov_9.229246_6#3133#3537#-1#ID=1394_6	22214	134	SfnB family sulfur acquisition oxidoreductase [Rhizobium etli](36%)	Other function
>NODE_1427_length_4772_cov_5.995103_3#864#1652#1#ID=1427_3	22461	262	hypothetical protein [Sphingobacterium sp. 2c-3](40%)	Phage related
>NODE_1478_length_4673_cov_17.306220_1#43#492#1#ID=1478_1	22819	149	hypothetical protein [Pseudomonas lundensis](38%)	Phage related	Yes
>NODE_1632_length_4410_cov_4.931719_2#391#1119#1#ID=1632_2	23863	242	cytochrome P450 [Haliangium ochraceum](28%)	Unknown
>NODE_1638_length_4402_cov_8.886064_7#1316#1768#-1#ID=1638_7	23899	150	chemotaxis-specific protein-glutamate methyltransferase CheB [Phycisphaeraceae bacterium](32%)	Phage related
>NODE_1641_length_4392_cov_32.507065_3#632#1132#1#ID=1641_3	23928	166	TetR/AcrR family transcriptional regulator [Streptomyces sp. RTd22](33%)	Phage related
>NODE_1646_length_4389_cov_40.477283_3#1091#1714#-1#ID=1646_3	23969	207	phage-like protein [Pantoea stewartii](50%)	Phage related
>NODE_1728_length_4269_cov_6.426323_2#276#836#-1#ID=1728_2	24596	186	capsid maturation protease [Gordonia phage Getalong](27%)	Phage related
>NODE_1764_length_4198_cov_5.829736_3#299#835#1#ID=1764_3	24844	178	hypothetical protein [Sphingomonas sp. S6-262](36%)	Phage related
>NODE_1775_length_4180_cov_13.112789_6#3606#4178#1#ID=1775_6	24933	191	phage tail tape measure protein [Sphingobium sp. AP49](42%)	Phage related
>NODE_1793_length_4156_cov_15.806665_2#290#814#1#ID=1793_2	25033	174	none	Phage related
>NODE_1830_length_4091_cov_11.300797_1#90#596#1#ID=1830_1	25253	168	hypothetical protein [Sedimenticola selenatireducens](28%)	Phage related
>NODE_1831_length_4091_cov_6.999502_7#3480#4091#1#ID=1831_7	25265	204	electron transport complex subunit RsxC [Clostridium magnum](25%)	Unknown
>NODE_1840_length_4079_cov_6.106893_2#1028#1597#1#ID=1840_2	25315	189	lysozyme [Mesorhizobium sp.](50%)	Other function
>NODE_1877_length_4032_cov_7.674754_2#208#837#-1#ID=1877_2	25529	209	hypothetical protein [Chelatococcus](43%)	Phage related
>NODE_1920_length_3978_cov_5.153984_2#201#839#1#ID=1920_2	25773	212	none	Phage related
>NODE_1929_length_3964_cov_7.170995_4#3064#3561#1#ID=1929_4	25826	165	type 11 methyltransferase [uncultured marine virus](52%)	Phage related
>NODE_2055_length_3821_cov_18.186599_9#3257#3820#-1#ID=2055_9	26601	187	host nuclease inhibitor [Arthrobacter phage Waltz](30%)	Phage related
>NODE_2091_length_3776_cov_36.263442_4#2523#3050#1#ID=2091_4	26805	175	none	Phage related
>NODE_2251_length_3638_cov_19.959585_5#2798#3265#1#ID=2251_5	27746	155	helix-turn-helix domain containing protein [Hyphomicrobium sp. GJ21](35%)	Phage related
>NODE_2341_length_3569_cov_4.977390_3#2294#2842#-1#ID=2341_3	28268	182	hypothetical protein EHM33_01900 [Chloroflexi bacterium](45%)	Phage related
>NODE_2415_length_3500_cov_6.007883_2#537#941#-1#ID=2415_2	28663	134	aldehyde dehydrogenase family protein [Rhodopirellula sp. SM50](31%)	Unknown
>NODE_2427_length_3491_cov_5.495902_4#856#1347#1#ID=2427_4	28728	163	terminase small subunit [Candidatus Promineofilum breve](40%)	True Positive	Yes
>NODE_2512_length_3420_cov_8.029895_1#19#522#1#ID=2512_1	29205	167	hypothetical protein Sano_08 [Xylella phage Sano](42%)	Phage related
>NODE_2523_length_3411_cov_5.070743_4#1652#2197#-1#ID=2523_4	29264	181	hypothetical protein UT51_C0011G0009 [Candidatus Nomurabacteria bacterium GW2011_GWC2_39_41](47%)	Phage related
>NODE_2536_length_3402_cov_5.755636_1#3#536#1#ID=2536_1	29330	177	phage recombination protein Bet [Xylanimonas cellulosilytica DSM 15894](31%)	Phage related
>NODE_2580_length_3372_cov_8.060055_4#1893#2441#-1#ID=2580_4	29581	182	hypothetical protein UY48_C0022G0013 [Candidatus Gottesmanbacteria bacterium GW2011_GWB1_49_7](41%)	Phage related
>NODE_2643_length_3320_cov_6.688136_2#177#743#1#ID=2643_2	29907	188	Phi92_gp056 [Enterobacteria phage phi92] (39%)	Phage related
>NODE_2785_length_3227_cov_4.691624_3#2604#3227#-1#ID=2785_3	30644	207	O-methyltransferase [Paenibacillus sp. FSL R7-269](34%)	Unknown
>NODE_2871_length_3169_cov_9.265676_2#726#1580#-1#ID=2871_2	31074	284	HNH endonuclease [Mycolicibacterium gilvum](31%)	Unknown
>NODE_2954_length_3114_cov_21.935176_10#2578#3114#1#ID=2954_10	31508	179	hypothetical protein [[Polyangium] brachysporum](39%)	Phage related
>NODE_3047_length_3062_cov_4.650820_1#1#582#1#ID=3047_1	31985	193	hypothetical protein [Streptomyces sp. CMB-StM0423](31%)	Unknown
>NODE_3047_length_3062_cov_4.650820_3#2027#2590#1#ID=3047_3	31987	187	Protein saf4 [Fusarium culmorum](32%)	Unknown
>NODE_3051_length_3060_cov_10.518593_5#2470#3060#1#ID=3051_5	32006	197	tetratricopeptide repeat protein [Thalassospira lucentensis](31%)	Phage related
>NODE_3081_length_3041_cov_6.517195_3#352#987#1#ID=3081_3	32159	211	metallo-beta-lactamase superfamily protein [Pyrenophora tritici-repentis](36%)	Other function
>NODE_3251_length_2949_cov_5.729993_3#1408#2205#1#ID=3251_3	32964	265	DUF1376 domain-containing protein [Janthinobacterium sp. CG23_2](48%)	Phage related
>NODE_3269_length_2942_cov_11.720614_4#1470#2009#1#ID=3269_4	33082	179	dTDP-4-dehydrorhamnose 3,5-epimerase [candidate division KSB1 bacterium](34%)	Unknown
>NODE_3387_length_2888_cov_4.984358_1#2#652#-1#ID=3387_1	33631	217	phage_regulatory_protein_[Anaerostipes_caccae](39%)	Phage related
>NODE_3410_length_2877_cov_8.204854_3#966#1637#1#ID=3410_3	33747	223	site-specific DNA-methyltransferase [Burkholderia multivorans](65%)	Phage related
>NODE_3430_length_2866_cov_5.857399_3#645#1244#1#ID=3430_3	33847	199	p097_[Rhizobium_phage_16-3](48%)	Phage related
>NODE_3471_length_2849_cov_6.213410_3#1173#1787#1#ID=3471_3	34051	204	hypothetical protein [Aequorivita sp.](33%)	Other function
>NODE_3558_length_2808_cov_5.086718_1#1#729#1#ID=3558_1	34438	242	aBC transporter related protein [Clostridium sp. CAG:413](38%)	Unknown
>NODE_3573_length_2802_cov_5.500183_1#1#606#-1#ID=3573_1	34513	202	class I SAM-dependent methyltransferase [Crenarchaeota archaeon](35%)	Unknown
>NODE_3587_length_2798_cov_10.438120_4#1326#1976#1#ID=3587_4	34571	216	hypothetical protein C4575_12875 [Candidatus Desulforudis sp.](34%)	Phage related
>NODE_3632_length_2779_cov_8.577663_1#3#560#1#ID=3632_1	34777	185	glycosyltransferase_[Streptomyces_phage_Wentworth](28%)	Phage related
>NODE_3697_length_2753_cov_6.190814_5#2148#2753#1#ID=3697_5	35080	202	glycosyltransferase [Paludisphaera borealis](38%)	Unknown
>NODE_3714_length_2746_cov_5.085361_1#2#613#1#ID=3714_1	35146	203	hypothetical protein [Siphoviridae sp.](47%)	Phage related
>NODE_3726_length_2739_cov_39.894520_4#1950#2474#-1#ID=3726_4	35199	174	none	Unknown
>NODE_3960_length_2645_cov_3.243580_4#1168#1890#-1#ID=3960_4	36266	204	hypothetical protein [Propionimicrobium lymphophilum](46%)	Unknown
>NODE_4017_length_2620_cov_9.271906_7#2093#2620#1#ID=4017_7	36524	176	putative DNA methyl transferase [Brucella phage Tb](28%)	Phage related
>NODE_4138_length_2569_cov_60.119487_4#1225#1629#-1#ID=4138_4	37047	134	hypothetical protein [Hymenobacter coccineus](33%)	Unknown
>NODE_4169_length_2559_cov_22.300725_1#154#645#-1#ID=4169_1	37187	163	NAD(P)H-dependent oxidoreductase [Phreatobacter stygius](24%)	Unknown
>NODE_4230_length_2539_cov_8.425325_6#1540#2076#-1#ID=4230_6	37472	178	NinB protein [Siphoviridae sp.](47%)	Phage related
>NODE_4249_length_2531_cov_18.263844_4#1656#2264#-1#ID=4249_4	37543	202	GNAT family N-acetyltransferase [Zhengella mangrovi](29%)	Phage related
>NODE_4251_length_2531_cov_6.016694_1#31#657#-1#ID=4251_1	37552	208	DUF2815 family protein [Burkholderia vietnamiensis](47%)	Unknown
>NODE_4345_length_2498_cov_5.140735_3#1917#2498#-1#ID=4345_3	37966	193	PBSX family phage terminase large subunit [Flavonifractor plautii](34%)	Phage related
>NODE_4368_length_2486_cov_14.154708_3#1683#2330#1#ID=4368_3	38049	215	ssDNA-binding protein [Enterobacter phage Enc34](44%)	Phage related
>NODE_4383_length_2480_cov_7.475676_3#1321#1914#-1#ID=4383_3	38116	197	none	Other function
>NODE_4408_length_2472_cov_3.828536_3#1294#1788#-1#ID=4408_3	38214	164	hypothetical protein CBC91_03040 [Rickettsiales bacterium TMED131](37%)	Phage related
>NODE_4552_length_2425_cov_5.415745_3#1982#2380#-1#ID=4552_3	38853	132	hypothetical protein [Rhizobium sp. JKLM12A2](80%)	Phage related	Yes
>NODE_4617_length_2406_cov_12.754183_2#751#1251#1#ID=4617_2	39141	166	none	Phage related
>NODE_4638_length_2401_cov_5.126827_4#1099#1611#-1#ID=4638_4	39229	170	phage/plasmid primase P4 family domain-containing protein [Enterococcus faecium](42%)	Phage related
>NODE_4641_length_2398_cov_5.473526_4#1170#1805#-1#ID=4641_4	39244	211	hypothetical_protein_ValB1MD_294_[Vibrio_phage_ValB1MD](37%)	Phage related
>NODE_4666_length_2393_cov_5.375755_3#562#1098#-1#ID=4666_3	39346	178	hypothetical protein [uncultured Mediterranean phage uvMED](34%)	Phage related
>NODE_4666_length_2393_cov_5.375755_7#1812#2393#-1#ID=4666_7	39350	193	AddA-like protein [Mycobacterium phage Wanda]933%）	Phage related
>NODE_4817_length_2351_cov_15.461775_1#1#510#-1#ID=4817_1	39946	170	Terminase-like family protein [Komagataeibacter saccharivorans]（47%）	Phage related
>NODE_4855_length_2344_cov_4.603349_5#1482#2198#1#ID=4855_5	40112	238	hypothetical protein [Halomonas meridiana]（42%）	Unknown
>NODE_4886_length_2333_cov_9.383525_4#1439#2014#-1#ID=4886_4	40240	191	none	Unknown
>NODE_4960_length_2313_cov_9.332887_5#1094#1702#-1#ID=4960_5	40523	202	Phage-related protein [Salmonella bongori N268-08]（44%）	Phage related
>NODE_5037_length_2291_cov_10.489170_4#1458#2054#1#ID=5037_4	40830	198	recombinant haemagglutinin-esterase fusion protein [Salmon isavirus]（32%）	Unknown
>NODE_5087_length_2277_cov_3.721163_1#2#415#1#ID=5087_1	41017	137	terminase small subunit, Nu1 [Magnetospirillum gryphiswaldense]（43%）	True Positive
>NODE_5122_length_2267_cov_3.673814_2#197#859#1#ID=5122_2	41169	220	hypothetical protein BE20_24945 [Sorangium cellulosum]（40%）	Phage related
>NODE_5274_length_2223_cov_16.183426_1#2#571#1#ID=5274_1	41726	189	helix-turn-helix transcriptional regulator [Rhodobacteraceae bacterium]（46%）	Other function
>NODE_5347_length_2206_cov_8.648053_2#154#735#1#ID=5347_2	42010	193	CD209 antigen-like [Pygocentrus nattereri]（40%）	Other function
>NODE_5395_length_2192_cov_7.752952_4#1521#2171#1#ID=5395_4	42201	216	hypothetical phage protein [Cylindrospermopsis raciborskii virus RM-2018a]（25%）	Phage related
>NODE_5435_length_2184_cov_5.029398_2#531#1085#-1#ID=5435_2	42346	184	hypothetical protein D8B38_01430 [Candidatus Saccharimonas sp.]（40%）	Phage related
>NODE_5443_length_2182_cov_7.719032_2#1653#2180#-1#ID=5443_2	42370	175	phage-related DNA polymerase [Myxococcus stipitatus]（53%）	Phage related
>NODE_5502_length_2170_cov_16.166110_1#64#873#-1#ID=5502_1	42575	269	endonuclease of the HNH family with predicted DNA-binding module in the C-terminus [Xanthomonas virus Xp10] （41%）	Phage related
>NODE_5521_length_2165_cov_8.088517_2#254#685#-1#ID=5521_2	42640	143	fumarylacetoacetate hydrolase family protein [Paenibacillus sp. 1-18]（30%）	Other function
>NODE_5545_length_2160_cov_15.758753_2#251#964#-1#ID=5545_2	42742	237	none	Unknown
>NODE_5570_length_2155_cov_8.841827_1#1#609#-1#ID=5570_1	42827	203	terminase large subunit [Arthrobacter phage Jasmine]（28%）	Phage related
>NODE_5639_length_2138_cov_15.215221_4#1612#2136#1#ID=5639_4	43098	175	hypothetical protein A2Z31_00740 [candidate division NC10 bacterium RBG_16_65_8]（39%）	Unknown
>NODE_5682_length_2129_cov_9.344693_3#1464#1943#-1#ID=5682_3	43266	159	hypothetical protein EOO81_09635 [Oxalobacteraceae bacterium]（37%）	Unknown
>NODE_5689_length_2127_cov_7.068713_2#429#896#-1#ID=5689_2	43291	155	phage terminase small subunit [Thermoflexus hugenholtzii]（28%）	True Positive
>NODE_5730_length_2119_cov_7.375734_1#1#774#-1#ID=5730_1	43437	258	portal protein [Arthrobacter phage Jasmine]（25%）	Phage related
>NODE_5850_length_2090_cov_5.962283_1#3#632#-1#ID=5850_1	43851	210	uncharacterized protein YdaU (DUF1376 family) [Burkholderia pyrrocinia]（43%）	Unknown
>NODE_5852_length_2089_cov_35.718967_4#978#1472#-1#ID=5852_4	43860	164	NAD(+)--arginine ADP-ribosyltransferase [Mycobacterium sp. UNC267MFSha1.1M11]（30%）	Phage related
>NODE_5900_length_2080_cov_10.417456_5#1081#1473#1#ID=5900_5	44023	130	protein of unknown function [Candidatus Promineofilum breve]（96%）	Unknown
>NODE_5922_length_2075_cov_6.777000_5#844#1359#1#ID=5922_5	44114	171	HNH endonuclease [Arthrobacter phage Pterodactyl]（40%）	Phage related
>NODE_5967_length_2067_cov_31.420683_1#39#560#1#ID=5967_1	44282	173	phage terminase small subunit P27 family [Herbaspirillum]（54%）	True Positive
>NODE_6054_length_2053_cov_6.517695_5#1596#1937#-1#ID=6054_5	44595	113	secreted protein containing CUB domain protein [Candidatus Magnetomorum sp. HK-1]（36%）	Unknown
>NODE_6416_length_1984_cov_4.747512_2#158#601#1#ID=6416_2	45867	147	non-ribosomal peptide synthetase [Streptomyces sp. NRRL S-920]（36%）	Unknown
>NODE_6568_length_1957_cov_5.371945_4#1453#1956#-1#ID=6568_4	46411	167	hypothetical protein [[Polyangium] brachysporum]（54%）	Unknown
>NODE_6645_length_1942_cov_5.362614_1#34#591#-1#ID=6645_1	46701	185	hypothetical protein A2Z40_04235 [Deltaproteobacteria bacterium RBG_19FT_COMBO_60_16]（34%）	Phage related
>NODE_6843_length_1906_cov_5.357728_3#527#1135#1#ID=6843_3	47344	202	bifunctional diguanylate cyclase/phosphodiesterase [Pseudomonas sp. 58 R 3]（28%）	Unknown
>NODE_6868_length_1902_cov_5.020252_1#2#577#1#ID=6868_1	47431	191	hypothetical protein EKK55_21815 [Rhodocyclaceae bacterium]（36%）	Unknown
>NODE_7153_length_1858_cov_6.214807_4#1411#1857#1#ID=7153_4	48373	149	hypothetical protein [uncultured Mediterranean phage uvDeep-CGR2-KM19-C37]（32%）	Phage related
>NODE_7409_length_1823_cov_7.799199_1#2#601#-1#ID=7409_1	49222	200	none	Phage related
>NODE_7477_length_1812_cov_14.957974_3#717#1352#-1#ID=7477_3	49447	211	none	Unknown
>NODE_7524_length_1808_cov_3.461627_5#918#1277#-1#ID=7524_5	49611	119	alkaline phosphatase family protein [Mucilaginibacter sp. HYN0043]（30%）	Unknown
>NODE_7596_length_1796_cov_8.281813_2#652#1080#1#ID=7596_2	49834	142	tail fiber [Erwinia phage vB_EamM-Y2]（44%）	Phage related
>NODE_7597_length_1796_cov_7.479372_2#378#962#-1#ID=7597_2	49837	194	none	Unknown
>NODE_7609_length_1794_cov_62.350204_1#2#508#1#ID=7609_1	49882	168	DUF551 domain-containing protein [Klebsiella pneumoniae]（29%）	Unknown
>NODE_7684_length_1781_cov_75.201055_3#1124#1681#-1#ID=7684_3	50136	185	scaffolding protein [Mycobacterium phage Aminay]（41%）	Phage related
>NODE_7701_length_1780_cov_4.430499_1#1#546#-1#ID=7701_1	50183	182	hypothetical protein [Paraburkholderia unamae]（36%）	Other function
>NODE_7737_length_1774_cov_16.566804_1#3#539#1#ID=7737_1	50290	178	hypothetical protein [Anaerolineaceae bacterium]（37%）	Unknown
>NODE_7772_length_1771_cov_7.334316_4#1113#1727#1#ID=7772_4	50416	204	LOW QUALITY PROTEIN: vitellogenin receptor [Dinoponera quadriceps]（41%）	Other function
>NODE_7921_length_1749_cov_6.452808_2#837#1298#-1#ID=7921_2	50895	153	hypothetical protein DRI81_00700 [Chloroflexi bacterium]（50%）	Unknown
>NODE_7967_length_1743_cov_5.656475_1#2#526#1#ID=7967_1	51060	174	hypothetical protein A2313_03770 [Candidatus Roizmanbacteria bacterium RIFOXYB2_FULL_41_10]（50%）	Unknown
>NODE_8097_length_1726_cov_7.168988_2#380#886#1#ID=8097_2	51460	168	hypothetical protein E3_0400 [Rhodococcus phage E3]（42%）	Other function
>NODE_8129_length_1722_cov_4.779599_2#436#858#-1#ID=8129_2	51563	140	none	Other function
>NODE_8205_length_1713_cov_10.790598_4#916#1491#-1#ID=8205_4	51811	191	Adhesion and penetration protein autotransporter precursor [Haemophilus influenzae]（29%）	Unknown
>NODE_8246_length_1706_cov_7.390558_2#260#826#-1#ID=8246_2	51939	188	hypothetical protein Unbinned2691contig1000_52 [Prokaryotic dsDNA virus sp.]（38%）	Phage related
>NODE_8396_length_1686_cov_4.036623_1#639#1166#1#ID=8396_1	52392	175	VRR-NUC domain-containing protein [Halanaerobium congolense]（35%）	Other function
>NODE_8588_length_1661_cov_4.048550_3#909#1661#1#ID=8588_3	52985	251	hypothetical protein [Marinobacter salarius]（38%）	Phage related
>NODE_8650_length_1653_cov_5.856781_1#217#828#1#ID=8650_1	53161	203	DUF551 domain-containing protein [Variovorax paradoxus]（33%）	Unknown
>NODE_8687_length_1648_cov_17.774952_2#651#1193#-1#ID=8687_2	53274	180	phage protein [Bordetella avium]（29%）	Phage related
>NODE_8938_length_1620_cov_5.271845_2#1024#1536#-1#ID=8938_2	53971	170	helix-turn-helix domain-containing protein [Escherichia coli]（26%）	Phage related
>NODE_8977_length_1615_cov_4.555195_2#538#1056#1#ID=8977_2	54087	172	none	Unknown
>NODE_9024_length_1610_cov_3.983713_3#1029#1610#-1#ID=9024_3	54228	193	hypothetical protein [Sandaracinus amylolyticus]（35%）	Unknown
>NODE_9326_length_1579_cov_5.654920_2#856#1458#-1#ID=9326_2	55146	200	hypothetical protein [Ensifer sp. MPMI2T]（51%）	Other function
>NODE_9451_length_1565_cov_12.188591_4#803#1330#-1#ID=9451_4	55501	175	none	Unknown
>NODE_9568_length_1553_cov_3.433694_1#3#641#-1#ID=9568_1	55844	213	none	Unknown
>NODE_9609_length_1548_cov_9.367278_3#994#1548#-1#ID=9609_3	55979	184	hypothetical protein [Burkholderia stagnalis]（31%）	Unknown
>NODE_9717_length_1538_cov_10.045796_3#329#943#1#ID=9717_3	56291	204	hypothetical_protein_[uncultured_Mediterranean_phage_uvDeep-CGR2-AD3-C76]（50%）	Phage related
>NODE_9990_length_1514_cov_4.519805_2#762#1106#1#ID=9990_2	57064	114	none	Unknown
>NODE_10220_length_1492_cov_3.691602_1#3#575#1#ID=10220_1	57744	190	none	Unknown
>NODE_10264_length_1488_cov_5.503185_2#187#831#-1#ID=10264_2	57871	214	HNH endonuclease [Chloroflexales bacterium ZM16-3]（35%）	Phage related
>NODE_10381_length_1478_cov_4.022808_1#3#527#1#ID=10381_1	58212	174	hypothetical protein [Absidia glauca]（40%）	Unknown
>NODE_10450_length_1472_cov_3.708661_4#800#1411#1#ID=10450_4	58417	203	hypothetical protein YH62_27730 [Rhizobium sp. LC145]（45%）	Unknown
>NODE_10496_length_1468_cov_17.085427_3#489#1019#-1#ID=10496_3	58546	176	hypothetical protein [unclassified Rhizobiales (miscellaneous)]（38%）	Other function
>NODE_10663_length_1453_cov_18.264877_4#730#1272#1#ID=10663_4	59008	180	putative essential recombination function protein [Prokaryotic dsDNA virus sp.]（72%）	Phage related
>NODE_10670_length_1453_cov_4.611756_1#2#481#1#ID=10670_1	59025	159	none	Unknown
>NODE_10749_length_1444_cov_6.333090_2#481#1113#1#ID=10749_2	59245	210	hypothetical protein A2Y53_07605 [Chloroflexi bacterium RBG_16_47_49]（33%）	Unknown
>NODE_10781_length_1441_cov_6.958272_3#847#1440#-1#ID=10781_3	59329	197	Site-specific DNA-methyltransferase (adenine-specific) [Desulfofundulus kuznetsovii DSM 6115]（57%）	Other function
>NODE_10857_length_1435_cov_4.552206_3#892#1413#1#ID=10857_3	59529	173	molybdenum cofactor guanylyltransferase MobA [Serratia sp. FDAARGOS_506]（33%）	Unknown
>NODE_10894_length_1431_cov_4.023599_3#1031#1429#-1#ID=10894_3	59630	132	oligoribonuclease [Sinobacteraceae bacterium](31%)	Unknown
>NODE_10910_length_1429_cov_6.466027_2#219#842#1#ID=10910_2	59676	207	hypothetical protein PUNSTDRAFT_68800 [Punctularia strigosozonata HHB-11173 SS5]（28%）	Unknown
>NODE_11110_length_1413_cov_10.945441_1#1#570#-1#ID=11110_1	60217	190	Sterigmatocystin 8-O-methyltransferase [Leucoagaricus sp. SymC.cos](29%)	Phage related
>NODE_11309_length_1397_cov_29.065809_2#360#899#1#ID=11309_2	60747	179	hypothetical protein kpv767_19 [Klebsiella phage vB_KpnP_KpV767](32%)	Phage related
>NODE_11439_length_1387_cov_5.850610_3#772#1386#-1#ID=11439_3	61084	204	hypothetical protein CVU16_06440 [Betaproteobacteria bacterium HGW-Betaproteobacteria-10] (57%)	Unknown
>NODE_11459_length_1386_cov_3.052632_4#693#1142#1#ID=11459_4	61132	149	Crp/Fnr family transcriptional regulator [Aquabacterium sp. W35](33%)	Other function
>NODE_12114_length_1341_cov_5.294629_1#32#559#-1#ID=12114_1	62868	175	hypothetical protein CRP01_25655 [Lewinella nigricans DSM 23189 = NBRC 102662](31%)	Phage related
>NODE_12623_length_1308_cov_3.259530_1#2#571#-1#ID=12623_1	64209	190	putative terminase large subunit [Prokaryotic dsDNA virus sp.] (35%)	Phage related
>NODE_12717_length_1303_cov_5.662866_2#736#1302#-1#ID=12717_2	64449	188	protease [Bordetella avium] (56%)	Other function
>NODE_12813_length_1298_cov_3.399019_2#796#1296#1#ID=12813_2	64689	167	TetR/AcrR family transcriptional regulator [Verrucomicrobiaceae bacterium](24%)	Unknown
>NODE_13002_length_1284_cov_13.134822_3#760#1284#1#ID=13002_3	65171	175	3-hydroxyacyl-CoA dehydrogenase [Bradyrhizobium shewense](28%)	Unknown
>NODE_13004_length_1284_cov_6.322581_1#356#910#1#ID=13004_1	65174	184	none	Unknown
>NODE_13072_length_1279_cov_5.792359_3#399#1214#-1#ID=13072_3	65343	271	Phosphoadenosine phosphosulfate reductase like [uncultured Mediterranean phage uvMED] (28%)	Phage related
>NODE_13732_length_1240_cov_14.745923_2#790#1239#-1#ID=13732_2	67011	149	hypothetical protein [uncultured Mediterranean phage uvMED](57%)	Phage related
>NODE_13908_length_1230_cov_4.806926_1#190#690#1#ID=13908_1	67444	166	hypothetical protein [Sedimenticola selenatireducens] (27%)	Other function
>NODE_14049_length_1223_cov_4.297038_3#683#1222#-1#ID=14049_3	67772	179	portal protein [Pectobacterium phage vB_PatP_CB1](45%)	Phage related
>NODE_14138_length_1218_cov_8.445319_2#220#996#1#ID=14138_2	67985	258	hypothetical protein P26218_29 [Rhodoferax phage P26218](35%)	Phage related
>NODE_14229_length_1213_cov_8.805800_2#706#1212#-1#ID=14229_2	68219	168	peptidylprolyl isomerase [Klebsiella pneumoniae](32%)	Unknown
>NODE_14243_length_1212_cov_7.733509_2#124#669#-1#ID=14243_2	68256	181	hypothetical protein [Bacteroidales bacterium](48%)	Unknown
>NODE_14345_length_1206_cov_19.007073_1#66#599#1#ID=14345_1	68503	177	hypothetical protein AMS14_04625 [Planctomycetes bacterium DG_20](30%)	Unknown
>NODE_14349_length_1206_cov_7.851459_1#45#545#-1#ID=14349_1	68513	166	glycosyltransferase family 2 protein [Allokutzneria sp. NRRL B-24872](30%)	Unknown
>NODE_14369_length_1205_cov_8.573451_2#658#1203#-1#ID=14369_2	68564	181	none	Unknown
>NODE_14371_length_1205_cov_6.892920_2#348#863#-1#ID=14371_2	68567	171	tetratricopeptide repeat protein [Leifsonia sp. Leaf336](37%)	Unknown
>NODE_14434_length_1202_cov_10.723159_2#500#997#-1#ID=14434_2	68720	165	hypothetical protein UW18_C0011G0018 [Microgenomates group bacterium GW2011_GWF1_44_10](47%)	Phage related
>NODE_14503_length_1199_cov_3.730427_1#86#640#1#ID=14503_1	68894	184	terminase small subunit [Candidatus Promineofilum breve](42%)	True Positive	Yes
>NODE_14592_length_1193_cov_8.694991_2#710#1084#-1#ID=14592_2	69103	124	helix-turn-helix domain-containing protein [Streptomyces katrae](31%)	Phage related
>NODE_14804_length_1183_cov_4.464801_2#715#1182#1#ID=14804_2	69620	156	phage major capsid protein [Mangrovibacter plantisponsor](36%)	Phage related
>NODE_14825_length_1182_cov_4.462511_1#2#568#-1#ID=14825_1	69662	189	methyltransferase [uncultured Mediterranean phage uvMED]（33%）	Phage related
>NODE_14876_length_1179_cov_5.407609_2#360#929#-1#ID=14876_2	69793	189	hypothetical protein GOBAR_DD13414 [Gossypium barbadense]（35%）	Other function
>NODE_15034_length_1170_cov_71.571689_2#525#1169#-1#ID=15034_2	70169	214	phage terminase large subunit [Burkholderia] （36%）	Phage related
>NODE_15141_length_1165_cov_4.576147_2#488#1012#1#ID=15141_2	70426	174	phosphonoacetate hydrolase [Salinivirgaceae bacterium]（42%）	Phage related
>NODE_15166_length_1164_cov_4.199265_1#203#691#1#ID=15166_1	70483	162	terminase small subunit [Sinorhizobium meliloti]（42%）	True Positive	Yes
>NODE_15307_length_1158_cov_4.349030_1#317#859#-1#ID=15307_1	70830	180	hypothetical protein [Porphyromonadaceae bacterium]（34%）	Unknown
>NODE_15522_length_1148_cov_3.827586_3#626#1147#1#ID=15522_3	71326	174	uncharacterized protein BESB_074470 [Besnoitia besnoiti]（40%）	Unknown
>NODE_15566_length_1145_cov_6.341121_3#581#1144#-1#ID=15566_3	71430	187	DUF2815 domain-containing protein [Clostridium sp.]（39%）	Unknown
>NODE_15628_length_1142_cov_3.785380_2#393#956#1#ID=15628_2	71584	187	terminase small subunit [Candidatus Dependentiae bacterium]（47%）	True Positive	Yes
>NODE_15741_length_1136_cov_7.065975_1#2#583#1#ID=15741_1	71853	193	phage portal protein [Hymenobacter psychrophilus]（34%）	Phage related
>NODE_15845_length_1132_cov_5.475875_1#3#605#1#ID=15845_1	72111	200	hypothetical protein FPSE_11782 [Fusarium pseudograminearum CS3096]（41%）	Unknown
>NODE_15879_length_1131_cov_2.413826_1#253#963#1#ID=15879_1	72191	236	DNA_polymerase_I_[uncultured_Mediterranean_phage]（33%）	Phage related
>NODE_16035_length_1124_cov_5.280267_2#226#816#-1#ID=16035_2	72560	196	hypothetical protein [Candidatus Pacearchaeota archaeon]（35%）	Unknown
>NODE_16128_length_1120_cov_4.507177_2#557#1120#-1#ID=16128_2	72758	187	none	Phage related
>NODE_16263_length_1114_cov_3.004812_2#64#786#1#ID=16263_2	73061	240	ERF family protein [Nostoc commune]（36%）	Other function
>NODE_16300_length_1112_cov_4.369335_1#185#718#-1#ID=16300_1	73145	177	hypothetical protein [Plesiocystis pacifica]（33%）	Unknown
>NODE_16346_length_1110_cov_4.341063_1#3#572#-1#ID=16346_1	73255	190	phage/plasmid primase P4 [Ralstonia solanacearum]（29%）	Phage related
>NODE_16380_length_1108_cov_21.609874_1#2#676#1#ID=16380_1	73331	224	DNA_methylase_[Vibrio_phage_1.168.O._10N.261.52.A10]（44%）	Phage related
>NODE_16417_length_1107_cov_5.211240_1#1#519#1#ID=16417_1	73421	172	hypothetical protein P26218_29 [Rhodoferax phage P26218]（45%）	Phage related
>NODE_16430_length_1107_cov_3.032946_1#1#495#1#ID=16430_1	73450	164	none	Unknown
>NODE_16465_length_1105_cov_3.625243_1#1#570#-1#ID=16465_1	73536	190	LPXTG-motif cell wall anchor domain protein [Streptococcus mitis SK321]（30%）	Phage related
>NODE_16742_length_1093_cov_6.116896_2#325#1014#1#ID=16742_2	74186	229	HNH endonuclease [Chloroflexi bacterium]（35%）	Other function
>NODE_16879_length_1088_cov_2.750247_2#147#776#-1#ID=16879_2	74519	209	methyltransferase domain-containing protein [Rhizobium undicola]（39%）	Unknown
>NODE_17340_length_1070_cov_3.332663_1#3#488#-1#ID=17340_1	75572	162	phage-related exonuclease [Bordetella bronchiseptica]（30%）	Phage related
>NODE_17385_length_1068_cov_4.624371_3#478#1035#1#ID=17385_3	75685	185	adenine-specific DNA methylase [Euryarchaeota archaeon]（39%）	Unknown
>NODE_17423_length_1067_cov_3.024194_1#1#528#1#ID=17423_1	75772	175	ATP-binding cassette domain-containing protein [Streptomyces]（34%）	Unknown
>NODE_17528_length_1062_cov_11.358663_2#254#778#-1#ID=17528_2	76020	174	short-chain dehydrogenase [Alphaproteobacteria bacterium HGW-Alphaproteobacteria-12]（32%）	Unknown
>NODE_17553_length_1061_cov_17.378296_2#357#860#-1#ID=17553_2	76073	167	putative HNH endonuclease [Roseobacter phage CRP-2] （32%）	Phage related
>NODE_17614_length_1059_cov_5.091463_1#2#643#-1#ID=17614_1	76214	214	Family 2 glycosyltransferase [Parcubacteria group bacterium GW2011_GWE2_42_14]（37%）	Other function
>NODE_17645_length_1058_cov_4.409969_2#571#1056#-1#ID=17645_2	76285	161	none	Unknown
>NODE_17794_length_1052_cov_11.369498_1#110#736#1#ID=17794_1	76608	208	site-specific DNA-methyltransferase [Elioraea sp. E_56292_2011]（37%）	Phage related
>NODE_17920_length_1047_cov_5.827160_2#523#1047#1#ID=17920_2	76866	175	putative modification methylase [Prokaryotic dsDNA virus sp.]（46%）	Phage related
>NODE_17965_length_1046_cov_4.526262_1#3#635#1#ID=17965_1	76970	210	phage family protein [Dickeya zeae] （43%）	Phage related
>NODE_18037_length_1044_cov_4.911249_1#2#439#-1#ID=18037_1	77127	146	tail fiber domain-containing protein [Pseudoxanthomonas sp. SGD-5-1]（30%）	Phage related
>NODE_18278_length_1036_cov_4.386056_1#2#817#-1#ID=18278_1	77666	272	modification methylase protein [Parcubacteria group bacterium GW2011_GWD2_42_14]（32%）	Other function
>NODE_18291_length_1035_cov_13.051042_3#487#957#1#ID=18291_3	77695	156	copper-translocating P-type ATPase [Chloroflexi bacterium]（32%）	Unknown
>NODE_18334_length_1034_cov_4.251303_1#2#628#-1#ID=18334_1	77788	209	none	Unknown
>NODE_19129_length_1006_cov_25.837809_1#2#448#1#ID=19129_1	79540	148	hypothetical protein [Anaerofustis stercorihominis]（27%）	Unknown
>NODE_19365_length_998_cov_24.615385_2#72#746#1#ID=19365_2	80059	224	hypothetical protein [Brevundimonas diminuta]（57%）	Unknown
>NODE_19412_length_997_cov_4.533623_2#455#997#-1#ID=19412_2	80167	180	3'-5' exonuclease domain protein [Coleofasciculus chthonoplastes]（34%）	Unknown
>NODE_19487_length_994_cov_5.394995_3#521#994#-1#ID=19487_3	80311	157	phage portal protein [Rhizobiales bacterium]（39%）	Phage related
>NODE_19511_length_993_cov_7.824619_1#1#609#-1#ID=19511_1	80367	203	single-stranded DNA-binding protein [Woeseiaceae bacterium]（40%）	Phage related
>NODE_19524_length_993_cov_4.659041_1#439#993#1#ID=19524_1	80402	185	site-specific DNA-methyltransferase [Acidovorax sp. 1608163]（77%）	Other function
>NODE_19547_length_992_cov_6.402399_2#151#639#-1#ID=19547_2	80455	162	3'-phosphatase, 5'-polynucleotide kinase [Xanthomonas phage Xoo-sp2]（51%）	Phage related
>NODE_19551_length_992_cov_5.695747_2#642#992#-1#ID=19551_2	80464	116	hypothetical protein [Actinobacteria bacterium]（64%）	Other function
>NODE_19647_length_989_cov_5.845733_2#546#989#1#ID=19647_2	80678	148	hypothetical protein 2050HW_00362 [Serratia phage 2050HW] （26%）	Phage related
>NODE_19702_length_987_cov_28.523026_2#126#809#1#ID=19702_2	80806	227	phage-related_exonuclease_[Janthinobacterium_sp._CG23_2]（57%）	Phage related
>NODE_19734_length_986_cov_13.626784_2#408#986#1#ID=19734_2	80866	193	phage portal protein [Herpetosiphon llansteffanense]（36%）	Phage related
>NODE_19816_length_984_cov_3.545655_1#3#635#1#ID=19816_1	81045	210	PLxRFG domain-containing protein [Vibrio sp. ER1A]（51%）	Other function
>NODE_19861_length_982_cov_27.373760_2#346#960#-1#ID=19861_2	81141	204	N-acetylmuramoyl-L-alanine amidase [Chloroflexi bacterium]（35%）	Unknown
>NODE_19870_length_982_cov_9.749724_1#54#674#-1#ID=19870_1	81164	206	ead/Ea22-like family protein [Pseudomonas aeruginosa]（34%）	Unknown
>NODE_20787_length_957_cov_3.350340_2#344#955#1#ID=20787_2	83088	204	none	Unknown
>NODE_20890_length_954_cov_2.957907_1#3#539#-1#ID=20890_1	83295	179	hypothetical protein DIU79_14085 [Actinobacteria bacterium]（49%）	Other function
>NODE_21413_length_939_cov_4.590278_1#41#592#-1#ID=21413_1	84387	183	HNH endonuclease [Arthrobacter phage Pterodactyl]（48%）	Phage related
>NODE_21421_length_939_cov_4.028935_2#253#831#1#ID=21421_2	84407	192	none	Unknown
>NODE_21764_length_930_cov_3.195322_2#323#928#-1#ID=21764_2	85108	201	glycosyltransferase family 1 protein [Candidatus Parcubacteria bacterium]（47%）	Other function
>NODE_22153_length_920_cov_3.364497_1#1#537#-1#ID=22153_1	85904	179	hypothetical protein A3F67_10935 [Verrucomicrobia bacterium RIFCSPHIGHO2_12_FULL_41_10]（55%）	Phage related
>NODE_22383_length_913_cov_7.282816_3#495#911#-1#ID=22383_3	86381	138	BMP and activin membrane-bound inhibitor homolog [Poecilia mexicana]（29%）	Unknown
>NODE_22397_length_913_cov_3.644391_2#218#823#-1#ID=22397_2	86412	201	hypothetical protein p28119_11 [Brucella phage 281_19]（40%）	Phage related
>NODE_22459_length_911_cov_4.074163_1#1#516#1#ID=22459_1	86535	171	none	Unknown
>NODE_22663_length_905_cov_4.083133_3#349#903#-1#ID=22663_3	86953	184	none	Unknown
>NODE_22706_length_904_cov_3.001206_1#2#583#1#ID=22706_1	87037	193	PBSX family phage terminase large subunit [Bacillus pseudofirmus]（25%）	Phage related
>NODE_22874_length_900_cov_3.198788_1#226#900#1#ID=22874_1	87379	225	HNH endonuclease [Arthrobacter phage Suppi] （32%）	Phage related
>NODE_23369_length_887_cov_6.544335_1#10#564#-1#ID=23369_1	88382	184	Transposase [Psychrobacter piechaudii]（52%）	Other function
>NODE_23504_length_884_cov_8.412855_1#1#528#-1#ID=23504_1	88641	176	hypothetical protein [Syntrophus gentianae]（30%）	Unknown
>NODE_23515_length_884_cov_3.934487_2#261#884#-1#ID=23515_2	88663	207	hypothetical protein A3F67_10955 [Verrucomicrobia bacterium RIFCSPHIGHO2_12_FULL_41_10]（28%）	Unknown
>NODE_23607_length_882_cov_3.915737_1#279#881#1#ID=23607_1	88840	201	tail fiber domain-containing protein [Bdellovibrio sp. NC01]（41%）	Phage related
>NODE_23866_length_876_cov_7.685393_3#452#874#-1#ID=23866_3	89361	140	hypothetical protein [Candidatus Promineofilum breve]（68%）	Unknown
>NODE_24053_length_872_cov_24.530740_3#246#872#1#ID=24053_3	89770	209	hypothetical protein [Alistipes indistinctus]（51%）	Unknown
>NODE_24148_length_870_cov_4.633962_1#223#732#1#ID=24148_1	89967	169	hypothetical_protein_NVP1199A_44_[Vibrio_phage_1.199.A._10N.286.55.C10]（43%）	Phage related
>NODE_24236_length_868_cov_7.374527_2#298#783#1#ID=24236_2	90129	161	none	Unknown
>NODE_24385_length_865_cov_4.426582_1#316#864#-1#ID=24385_1	90406	182	PAS domain-containing protein [Rhodobacteraceae bacterium SM1903](29%)	Unknown
>NODE_24486_length_863_cov_3.468274_1#2#544#1#ID=24486_1	90596	180	hypothetical_protein_NVP1101O_054_[Vibrio_phage_1.101.O._10N.261.45.C6](459%)	Phage related
>NODE_24909_length_853_cov_7.089974_2#298#852#1#ID=24909_2	91433	185	site-specific DNA-methyltransferase [Acidovorax sp. 1608163](72%)	Other function
>NODE_25156_length_848_cov_5.236740_2#166#780#-1#ID=25156_2	91925	204	hypothetical protein COB78_09945 [Rhizobiales bacterium](27%)	Unknown
>NODE_25345_length_844_cov_4.357607_1#2#631#-1#ID=25345_1	92288	210	acetyltransferase [Microbacterium phage Warren](30%)	Phage related
>NODE_25386_length_843_cov_4.990885_2#124#726#1#ID=25386_2	92370	200	hypothetical protein [Hungateiclostridium thermocellum](35%)	Unknown
>NODE_25461_length_842_cov_3.035202_1#63#635#1#ID=25461_1	92519	190	ASCH domain-containing protein [Sphingomonas sp. YR710](34%)	Unknown
>NODE_25621_length_838_cov_4.314548_1#40#501#-1#ID=25621_1	92824	153	hypothetical protein [Massilia timonae](56%)	Unknown
>NODE_26018_length_830_cov_2.597351_2#268#828#1#ID=26018_2	93621	187	none	Unknown
>NODE_26042_length_829_cov_4.119363_1#1#810#-1#ID=26042_1	93663	270	none	Unknown
>NODE_26055_length_829_cov_3.533156_2#300#827#1#ID=26055_2	93686	176	phage portal protein [Acidimicrobiia bacterium](56%)	Phage related
>NODE_26438_length_821_cov_3.103217_1#3#551#-1#ID=26438_1	94421	183	hypothetical protein [Salinispora pacifica](52%)	Unknown
>NODE_26969_length_810_cov_3.368707_2#188#808#1#ID=26969_2	95426	207	phage/plasmid primase, P4 family [Thermaerobacter subterraneus](34%)	Phage related
>NODE_27009_length_809_cov_5.362398_1#3#581#1#ID=27009_1	95501	192	N-acetylmuramoyl-L-alanine amidase LytC precursor [Candidatus Accumulibacter sp. SK-02](45%)	Other function
>NODE_27060_length_808_cov_4.425648_1#1#588#1#ID=27060_1	95600	195	hypothetical protein [Janthinobacterium sp. Marseille](57%)	Unknown
>NODE_27108_length_807_cov_5.124317_1#3#509#-1#ID=27108_1	95691	169	hypothetical protein [Mesorhizobium sp. Root157](48%)	Other function
>NODE_27121_length_807_cov_3.748634_1#1#807#1#ID=27121_1	95718	269	none	Unknown
>NODE_27382_length_802_cov_6.310867_2#252#800#1#ID=27382_2	96242	183	LLM class flavin-dependent oxidoreductase [Halorussus ruber](28%)	Unknown
>NODE_27571_length_799_cov_3.910221_1#3#629#1#ID=27571_1	96623	208	hypothetical protein EYC59_04085 [Candidatus Saccharibacteria bacterium](31%)	Unknown
>NODE_27696_length_796_cov_8.809986_1#3#617#-1#ID=27696_1	96843	205	hypothetical protein DRJ03_01660 [Chloroflexi bacterium](47%)	Phage related
>NODE_27810_length_794_cov_10.958275_2#254#793#-1#ID=27810_2	97059	179	carbohydrate-binding protein [Acinetobacter baumannii](50%)	Other function
>NODE_27873_length_793_cov_7.093315_2#162#734#1#ID=27873_2	97181	190	terminase small subunit [Candidatus Promineofilum breve](51%)	True Positive
>NODE_27962_length_792_cov_3.560669_2#195#791#-1#ID=27962_2	97348	198	Phage exonuclease [Fimbriiglobus ruber](33%)	Phage related
>NODE_28028_length_791_cov_2.365922_1#3#791#-1#ID=28028_1	97465	263	none	Unknown
>NODE_28047_length_790_cov_7.163636_1#1#789#-1#ID=28047_1	97500	263	none	Unknown
>NODE_28175_length_788_cov_4.293128_1#2#535#1#ID=28175_1	97749	177	phage portal protein [Blastopirellula](40%)	Phage related
>NODE_28279_length_786_cov_6.014065_2#68#703#-1#ID=28279_2	97934	211	DNA adenine methylase [Neisseriaceae bacterium](25%)	Unknown
>NODE_28287_length_786_cov_5.077356_2#181#786#-1#ID=28287_2	97947	201	phage terminase large subunit [Singulisphaera acidiphila](55%)	Phage related
>NODE_28431_length_784_cov_5.523272_1#1#546#-1#ID=28431_1	98210	182	hypothetical protein [Ahrensia sp.](89%)	Other function
>NODE_28579_length_782_cov_3.188119_2#253#780#1#ID=28579_2	98493	176	DNA methylase N-4 [Alphaproteobacteria bacterium](55%)	Other function
>NODE_28602_length_781_cov_25.983003_2#176#781#1#ID=28602_2	98534	202	terminase [Desulforhopalus singaporensis](47%)	True Positive
>NODE_28745_length_779_cov_3.622159_2#168#779#1#ID=28745_2	98793	204	none	Unknown
>NODE_28803_length_778_cov_3.220484_2#356#778#-1#ID=28803_2	98905	140	phage tail tape measure protein [Planctomycetes bacterium](56%)	Phage related
>NODE_28884_length_776_cov_9.948645_1#34#612#-1#ID=28884_1	99052	192	hypothetical protein [Mesorhizobium sp. Root102](37%)	Phage related
>NODE_28888_length_776_cov_8.386591_1#2#658#-1#ID=28888_1	99060	219	hypothetical protein AKJ09_03662 [Labilithrix luteola](34%)	Unknown
>NODE_28980_length_775_cov_2.795714_2#223#774#-1#ID=28980_2	99223	183	hypothetical protein OJAV_G00070380 [Oryzias javanicus](26%)	Unknown
>NODE_29091_length_773_cov_3.507163_1#3#773#1#ID=29091_1	99419	257	tape measure protein [Streptococcus suis](19%)	Phage related
>NODE_29225_length_770_cov_25.723741_2#146#730#-1#ID=29225_2	99648	194	recombinase [Lactococcus lactis](60%)	Phage related
>NODE_29239_length_770_cov_4.907914_1#3#548#-1#ID=29239_1	99669	182	hypothetical protein Unbinned7358contig1000_17 [Prokaryotic dsDNA virus sp.](37%)	Phage related
>NODE_29288_length_769_cov_6.430836_1#3#767#1#ID=29288_1	99758	255	hypothetical protein [Mesorhizobium sp. UASWS1009](52%)	Unknown
>NODE_29659_length_763_cov_3.005814_1#1#762#-1#ID=29659_1	100446	254	regulatory protein RecX [Agarivorans sp. Toyoura001](30%)	Unknown
>NODE_29708_length_762_cov_3.379913_1#1#648#1#ID=29708_1	100540	215	none	Unknown
>NODE_29785_length_760_cov_17.916788_2#259#759#1#ID=29785_2	100687	167	hypothetical protein [Sorangium cellulosum](41%)	Unknown
>NODE_30067_length_756_cov_4.668135_1#87#755#-1#ID=30067_1	101193	222	none	Unknown
>NODE_30309_length_752_cov_5.036928_1#3#545#-1#ID=30309_1	101625	181	putative portal protein [Prokaryotic dsDNA virus sp.](23%)	Phage related
>NODE_30613_length_747_cov_3.119048_1#1#699#1#ID=30613_1	102170	232	DUF2303 family protein [Azoarcus sp. CC-YHH838](65%)	Unknown
>NODE_30654_length_746_cov_5.540984_1#1#672#1#ID=30654_1	102248	223	exonuclease_[Ralstonia_phage_RS-PI-1](32%)	Phage related
>NODE_30756_length_744_cov_35.291480_2#275#667#-1#ID=30756_2	102443	130	hypothetical protein [Pseudomonas frederiksbergensis](46%)	Phage related
>NODE_30776_length_744_cov_4.928251_1#37#630#-1#ID=30776_1	102480	197	homing endonuclease [Escherichia phage vB_EcoM_PHB13](38%)	Phage related
>NODE_30794_length_744_cov_3.881913_2#158#742#1#ID=30794_2	102509	195	hypothetical protein PVS_26 [Vibrio phage vB_VspS_VS-ABTNL-3](42%)	Phage related
>NODE_30808_length_744_cov_2.983558_1#1#744#1#ID=30808_1	102534	248	none	Unknown
>NODE_30920_length_742_cov_5.398801_1#179#733#1#ID=30920_1	102733	184	Transposase [Psychrobacter piechaudii](52%)	Other function
>NODE_31272_length_737_cov_3.126888_1#3#623#1#ID=31272_1	103363	206	hypothetical protein [Candidatus Competibacteraceae bacterium](42%)	Unknown
>NODE_31276_length_737_cov_2.877644_2#121#735#-1#ID=31276_2	103370	204	GDP-L-fucose synthase [Flavobacteriaceae bacterium](39%)	Unknown
>NODE_31509_length_733_cov_4.193009_1#1#387#1#ID=31509_1	103762	128	none	Unknown
>NODE_31812_length_729_cov_4.418960_2#136#729#1#ID=31812_2	104300	198	DNA methyltransferase [Brevundimonas sp.](54%)	Other function
>NODE_31885_length_728_cov_5.116386_1#3#527#-1#ID=31885_1	104422	175	hypothetical protein A2496_24435 [Burkholderiales bacterium RIFOXYC12_FULL_60_6](53%)	Phage related
>NODE_32013_length_726_cov_9.110599_1#3#725#1#ID=32013_1	104643	241	phage tail protein [Achromobacter xylosoxidans](30%)	Phage related
>NODE_32071_length_726_cov_1.910906_2#159#725#1#ID=32071_2	104750	189	putative thymidylate synthase complementing protein [Xanthomonas phage Xp15](37%)	Phage related
>NODE_32353_length_721_cov_22.877709_1#127#720#1#ID=32353_1	105251	198	HNH endonuclease [Mycobacterium phage Minerva](29%)	Phage related
>NODE_32377_length_721_cov_4.119195_1#3#497#1#ID=32377_1	105299	164	none	Unknown
>NODE_32491_length_719_cov_11.045031_1#28#648#-1#ID=32491_1	105504	206	seroreactive antigen BMN1-5 [Culex quinquefasciatus](44%)	Other function
>NODE_32554_length_719_cov_2.770186_2#192#719#1#ID=32554_2	105618	176	PD-(D/E)XK nuclease family protein [Deltaproteobacteria bacterium](41%)	Other function
>NODE_32773_length_716_cov_2.981279_1#1#555#-1#ID=32773_1	106007	185	unnamed_protein_product_[uncultured_Mediterranean_phage_uvMED](31%)	Phage related
>NODE_32865_length_714_cov_6.503912_2#187#561#1#ID=32865_2	106178	124	none	Unknown
>NODE_32892_length_714_cov_3.618153_1#2#712#-1#ID=32892_1	106223	237	none	Unknown
>NODE_33046_length_712_cov_3.576138_2#160#711#1#ID=33046_2	106489	184	head protein [EBPR podovirus 2](73%)	Phage related
>NODE_33064_length_712_cov_2.998430_1#1#642#1#ID=33064_1	106521	213	DUF3987 domain-containing protein [Bacteroides sp. NM69_E16B]937%）	Unknown
>NODE_33187_length_710_cov_3.844094_1#1#642#1#ID=33187_1	106721	213	coil containing protein [Vibrio phage 1.012.O._10N.261.48.C12]（37%）	Phage related
>NODE_33414_length_707_cov_3.007911_1#2#529#-1#ID=33414_1	107105	176	Phage integrase family protein [Klenkia marina]（36%）	Phage related
>NODE_33702_length_702_cov_12.339713_1#50#700#1#ID=33702_1	107595	217	hypothetical protein A2W25_02410 [candidate division Zixibacteria bacterium RBG_16_53_22]（23%）	Unknown
>NODE_33707_length_702_cov_7.564593_1#50#700#1#ID=33707_1	107601	217	hypothetical protein A2W25_02410 [candidate division Zixibacteria bacterium RBG_16_53_22]（23%）	Unknown
>NODE_33808_length_701_cov_4.038339_1#3#542#-1#ID=33808_1	107769	180	none	Unknown
>NODE_33990_length_699_cov_2.990385_1#1#633#1#ID=33990_1	108081	210	none	Unknown
>NODE_34010_length_698_cov_14.574639_1#55#612#1#ID=34010_1	108116	185	none	Unknown
>NODE_34028_length_698_cov_4.202247_1#2#697#1#ID=34028_1	108150	232	PLP-dependent aminotransferase family protein [Lysinibacillus sphaericus]（25%）	Unknown
>NODE_34096_length_697_cov_5.742765_2#186#695#-1#ID=34096_2	108268	169	site-specific integrase [Pectobacterium]（30%）	Unknown
>NODE_34139_length_697_cov_2.477492_2#107#697#-1#ID=34139_2	108338	196	hypothetical protein A2Y53_07605 [Chloroflexi bacterium RBG_16_47_49]（38%）	Unknown
>NODE_34250_length_695_cov_3.861290_1#39#503#-1#ID=34250_1	108528	154	anti-restriction protein [Cellulophaga phage phi13:2]（51%）	Phage related
>NODE_34340_length_694_cov_3.345719_1#2#640#1#ID=34340_1	108663	212	phage portal protein [Streptomyces sp. 769]（31%）	Phage related
>NODE_34668_length_690_cov_2.523577_1#1#510#-1#ID=34668_1	109230	170	hypothetical protein STSP2_03168 [Phycisphaerae bacterium ST-NAGAB-D1]（32%）	Unknown
>NODE_34693_length_689_cov_5.218241_1#2#580#1#ID=34693_1	109269	192	intraflagellar transport protein 74 homolog [Octopus vulgaris]（28%）	Unknown
>NODE_34917_length_686_cov_5.232406_2#54#536#-1#ID=34917_2	109669	160	hypothetical protein [Bacteroides acidifaciens]（33%）	Unknown
>NODE_35521_length_679_cov_2.779801_1#1#678#-1#ID=35521_1	110710	226	hypothetical protein COW76_21350 [Shewanella sp. CG18_big_fil_WC_8_21_14_2_50_42_11]（33%）	Unknown
>NODE_35701_length_676_cov_92.542429_1#68#676#1#ID=35701_1	111023	203	hypothetical protein A4E53_01728 [Pelotomaculum sp. PtaB.Bin104]（71%）	Unknown
>NODE_35779_length_676_cov_2.687188_1#2#676#-1#ID=35779_1	111149	225	isoprenyl transferase [Prochlorococcus sp. HOT208_60m_813G15]（26%）	Unknown
>NODE_35914_length_674_cov_4.140234_2#75#653#1#ID=35914_2	111389	192	phage family protein [Dickeya zeae]（46%）	Phage related
>NODE_35968_length_674_cov_2.255426_1#41#535#1#ID=35968_1	111477	164	general secretion pathway protein K [Candidatus Kentron sp. FM]（22%）	Unknown
>NODE_36032_length_673_cov_3.297659_1#1#672#-1#ID=36032_1	111584	224	helicase [Chroococcidiopsis cubana]（47%）	Other function
>NODE_36172_length_671_cov_3.936242_1#2#613#-1#ID=36172_1	111824	204	hypothetical protein [Candidatus Rokubacteria bacterium] (36%)	Unknown
>NODE_36248_length_670_cov_9.865546_2#85#648#-1#ID=36248_2	111954	187	pentapeptide repeat-containing protein [Mycolicibacterium porcinum](52%)	Other function
>NODE_36475_length_668_cov_2.698145_1#72#668#-1#ID=36475_1	112323	198	none	Unknown
>NODE_36759_length_664_cov_4.638370_1#3#662#-1#ID=36759_1	112810	220	hypothetical protein [Mucilaginibacter psychrotolerans](45%)	Unknown
>NODE_37148_length_660_cov_3.316239_1#89#658#1#ID=37148_1	113477	190	hypothetical protein AB9_089 [Acinetobacter phage vB_AbaM_B9]（44%）	Phage related
>NODE_37543_length_655_cov_10.648276_2#114#653#1#ID=37543_2	114118	180	hypothetical protein BPHS0_25 [Phage 5P_3]（28%）	Phage related
>NODE_37688_length_654_cov_2.917098_1#2#652#-1#ID=37688_1	114349	217	none	Unknown
>NODE_37760_length_653_cov_3.377163_1#67#651#-1#ID=37760_1	114471	194	DNA methyltransferase [Flavobacterium phage vB_FspS_hemulen6-1] （54%）	Phage related
>NODE_38225_length_648_cov_2.289703_1#36#647#-1#ID=38225_1	115273	203	hypothetical protein SEA_SATIS_76 [Streptomyces phage Satis]（30%）	Phage related
>NODE_38315_length_647_cov_2.260490_1#3#545#-1#ID=38315_1	115409	181	hypothetical protein [Prosthecobacter debontii]（25%）	Unknown
>NODE_38541_length_644_cov_3.344464_1#2#520#1#ID=38541_1	115792	172	terminase large subunit [Paenibacillus]（43%）	Phage related
>NODE_38779_length_642_cov_2.446208_1#1#573#1#ID=38779_1	116166	190	hypothetical protein DY000_00026124 [Brassica cretica]（36%）	Unknown
>NODE_38950_length_640_cov_2.346903_1#120#638#-1#ID=38950_1	116446	172	hypothetical protein [Acidobacteria bacterium]（32%）	Unknown
>NODE_38958_length_640_cov_1.683186_1#1#639#1#ID=38958_1	116458	213	hypothetical protein CTY28_15955 [Hyphomicrobium sp.]（29%）	Unknown
>NODE_39188_length_637_cov_3.352313_1#3#635#-1#ID=39188_1	116836	211	ABC transporter substrate-binding protein [Pseudoalteromonas rubra]（36%）	Unknown
>NODE_39242_length_636_cov_8.770053_2#58#636#-1#ID=39242_2	116934	192	Phage terminase, large subunit, PBSX family [Candidatus Giovannonibacteria bacterium GW2011_GWA2_44_26]（53%）	Phage related
>NODE_39372_length_635_cov_4.155357_1#1#342#1#ID=39372_1	117144	113	fumarate reductase/succinate dehydrogenase flavoprotein subunit [Pseudonocardia thermophila]（34%）	Unknown
>NODE_39408_length_635_cov_2.933929_1#2#634#-1#ID=39408_1	117200	211	Phage protein [Parcubacteria bacterium C7867-008]（47%）	Phage related
>NODE_39441_length_634_cov_10.808587_1#3#428#1#ID=39441_1	117258	141	radial spoke head 1 homolog [Labrus bergylta]（31%）	Unknown
>NODE_39521_length_634_cov_2.477639_1#3#632#1#ID=39521_1	117387	210	hypothetical protein [Verrucomicrobiales bacterium]（60%）	Unknown
>NODE_39577_length_633_cov_4.381720_1#2#631#-1#ID=39577_1	117478	210	diguanylate cyclase [Halofilum ochraceum]（43%）	Other function
>NODE_39784_length_631_cov_3.674460_1#1#630#-1#ID=39784_1	117810	210	Terminase large subunit [Burkholderia virus Bcepmigl]（61%）	Phage related
>NODE_39885_length_630_cov_2.936937_1#3#629#1#ID=39885_1	117976	209	CoA transferase [Mycolicibacter hiberniae]（36%）	Unknown
>NODE_39918_length_629_cov_12.111913_1#1#546#1#ID=39918_1	118035	181	hypothetical protein PFICI_00380 [Pestalotiopsis fici W106-1]（32%）	Unknown
>NODE_40063_length_628_cov_2.893309_1#65#628#1#ID=40063_1	118275	188	hypothetical protein C0594_01865 [Marinilabiliales bacterium]（34%）	Unknown
>NODE_40081_length_628_cov_2.280289_1#1#627#-1#ID=40081_1	118302	209	hypothetical protein COW46_00695 [Candidatus Gracilibacteria bacterium CG17_big_fil_post_rev_8_21_14_2_50_48_13]（29%）	Unknown
>NODE_40132_length_627_cov_3.416667_1#2#496#-1#ID=40132_1	118386	165	HNH endonuclease [Arthrobacter phage Pterodactyl]（46%）	Phage related
>NODE_40242_length_626_cov_2.952813_1#1#624#-1#ID=40242_1	118557	208	none	Unknown
>NODE_40248_length_626_cov_2.735027_1#1#624#1#ID=40248_1	118565	208	NADH-quinone oxidoreductase subunit G [Actinomyces marimammalium]（20%）	Unknown
>NODE_40377_length_625_cov_2.314545_1#3#623#1#ID=40377_1	118784	207	PBSX family phage terminase large subunit [Lactobacillus gastricus]933%)	Phage related
>NODE_40537_length_623_cov_4.436131_1#1#570#1#ID=40537_1	119040	189	phage major capsid protein [Epsilonproteobacteria bacterium](32%)	Phage related
>NODE_40602_length_623_cov_2.277372_2#129#623#1#ID=40602_2	119145	165	none	Unknown
>NODE_40624_length_622_cov_10.250457_2#92#601#-1#ID=40624_2	119179	169	DNA methyltransferase [Geobacter sp.](56%)	Other function
>NODE_40670_length_622_cov_3.480804_2#183#620#1#ID=40670_2	119258	146	PIN domain-containing protein [Bradyrhizobium sp. th.b2](60%)	Other function
>NODE_40729_length_621_cov_13.034799_1#1#579#1#ID=40729_1	119351	192	Phage terminase, large subunit, PBSX family [Candidatus Giovannonibacteria bacterium GW2011_GWA2_44_26](53%)	Phage related
>NODE_40777_length_621_cov_3.375458_1#2#478#1#ID=40777_1	119424	158	none	Unknown
>NODE_40865_length_620_cov_4.218349_1#2#619#1#ID=40865_1	119559	206	Phage stabilisation protein [Klebsiella pneumoniae] (26%)	Phage related
>NODE_40910_length_620_cov_2.700917_1#3#620#1#ID=40910_1	119627	206	phage Gp37/Gp68 family protein [Burkholderia ubonensis](43%)	Phage related
>NODE_40945_length_619_cov_8.281250_1#2#598#1#ID=40945_1	119678	198	PBSX family phage terminase large subunit [Bacillus safensis](28%)	Phage related
>NODE_41034_length_619_cov_2.292279_2#164#619#-1#ID=41034_2	119809	151	none	Unknown
>NODE_41046_length_619_cov_1.900735_1#3#521#-1#ID=41046_1	119826	173	phage tail tape measure protein [Piscirickettsiaceae bacterium NZ-RLO2](41%)	Phage related
>NODE_41252_length_616_cov_21.811460_1#13#615#1#ID=41252_1	120160	201	tRNA uridine-5-carboxymethylaminomethyl(34) synthesis GTPase MnmE [Dyadobacter sp. SG02](35%)	Unknown
>NODE_41354_length_615_cov_15.037037_1#36#614#-1#ID=41354_1	120331	192	hypothetical protein [Burkholderia](52%)	Unknown
>NODE_41562_length_613_cov_7.630112_1#1#612#1#ID=41562_1	120665	204	none	Unknown
>NODE_41585_length_613_cov_4.492565_1#1#612#1#ID=41585_1	120707	204	none	Unknown
>NODE_41754_length_612_cov_2.366853_1#93#611#1#ID=41754_1	120978	173	hypothetical protein CDD83_1070 [Cordyceps sp. RAO-2017](27%)	Unknown
>NODE_41870_length_610_cov_8.207477_1#3#608#-1#ID=41870_1	121166	202	terminase-like family protein [Leptolyngbya sp. PCC 7375](41%)	Phage related
>NODE_41975_length_609_cov_9.316479_1#1#609#1#ID=41975_1	121334	203	phage terminase large subunit [Tepidimonas taiwanensis] (46%)	Phage related
>NODE_41991_length_609_cov_4.719101_1#1#609#1#ID=41991_1	121356	203	hypothetical protein [Vespertiliibacter pulmonis](32%)	Unknown
>NODE_42122_length_608_cov_3.953096_1#2#607#1#ID=42122_1	121569	202	terminase large subunit [Diaphorobacter polyhydroxybutyrativorans](72%)	Phage related
>NODE_42126_length_608_cov_3.878049_1#3#608#-1#ID=42126_1	121575	202	tape measure protein [Pseudomonas lundensis](33%)	Phage related
>NODE_42130_length_608_cov_3.692308_1#3#608#-1#ID=42130_1	121579	202	capsid assembly protein [uncultured Mediterranean phage uvMED](25%)	Phage related
>NODE_42317_length_607_cov_2.355263_1#3#605#-1#ID=42317_1	121861	201	site-specific DNA-methyltransferase [Bacillus amyloliquefaciens](37%)	Unknown
>NODE_42484_length_605_cov_3.196226_1#58#603#-1#ID=42484_1	122126	181	phage major capsid protein [Thermus brockianus](31%)	Phage related
>NODE_42558_length_604_cov_6.489603_1#2#604#1#ID=42558_1	122239	201	phage/plasmid primase, P4 family [Hyphomicrobium denitrificans ATCC 51888](47%)	Phage related
>NODE_42589_length_604_cov_3.844991_1#1#603#1#ID=42589_1	122294	201	none	Unknown
>NODE_42875_length_602_cov_2.747628_1#1#600#-1#ID=42875_1	122734	200	UDP-N-acetylmuramoyl-tripeptide--D-alanyl-D-alanine ligase [Muribaculaceae bacterium Isolate-002 (NCI)](28%)	Unknown
>NODE_42988_length_601_cov_2.952471_1#1#600#1#ID=42988_1	122915	200	extracellular solute-binding protein [Clostridium sp. PI-S10-A1B](33%)	Unknown
>NODE_43097_length_600_cov_3.020952_1#3#599#-1#ID=43097_1	123095	199	hypothetical protein [Bradyrhizobium icense](33%)	Unknown
>NODE_43103_length_600_cov_2.836190_2#164#598#-1#ID=43103_2	123105	144	DUF935 family protein [Meiothermus phage MMP7](34%)	Phage related
>NODE_43248_length_598_cov_37.564054_1#2#517#1#ID=43248_1	123332	171	hypothetical protein RchiOBHm_Chr1g0318961 [Rosa chinensis]（30%）	Unknown
>NODE_43262_length_598_cov_10.470363_1#2#598#1#ID=43262_1	123349	199	phage portal protein [Planctomyces sp.](30%)	Phage related
>NODE_43292_length_598_cov_3.971319_1#1#597#-1#ID=43292_1	123396	199	class 2 helix-hairpin-helix motif protein [Vibrio phage 1.264.O._10N.286.51.F2](39%)	Phage related
>NODE_43361_length_598_cov_2.078394_1#1#597#-1#ID=43361_1	123505	199	uncharacterized protein LOC114935918 [Nylanderia fulva](24）	Unknown
>NODE_43368_length_597_cov_42.015326_1#2#523#-1#ID=43368_1	123515	174	phage terminase small subunit P27 family [Diaphorobacter polyhydroxybutyrativorans](82%)	True Positive
>NODE_43381_length_597_cov_11.954023_1#3#596#-1#ID=43381_1	123533	198	site-specific DNA-methyltransferase [Vibrio phage vB_VspS_VS-ABTNL-3](28%)	Phage related
>NODE_43428_length_597_cov_3.438697_1#74#595#1#ID=43428_1	123606	174	sortase-associated OmpA-like protein PdsO [Thalassomonas sp. M1454](35%)	Unknown
>NODE_43473_length_597_cov_2.590038_1#2#595#-1#ID=43473_1	123674	198	thermostable DNA polymerase I [Escherichia phage L AB-2017](37%)	Phage related
>NODE_43747_length_594_cov_31.500963_1#1#594#1#ID=43747_1	124101	198	hypothetical protein DMD79_25720 [Candidatus Rokubacteria bacterium](28%)	Unknown
>NODE_43884_length_593_cov_22.602317_2#70#534#1#ID=43884_2	124323	154	DNA repair protein RecO [Asaia bogorensis](33%)	Unknown
>NODE_44058_length_592_cov_3.243714_1#1#591#1#ID=44058_1	124608	197	RNA helicase Mov10l1-like [Stylophora pistillata](30%)	Unknown
>NODE_44131_length_591_cov_3.798450_1#1#591#-1#ID=44131_1	124721	197	phage tail tape measure protein [Actinoplanes italicus](33%)	Phage related
>NODE_44211_length_590_cov_12.869903_1#53#589#-1#ID=44211_1	124856	178	hypothetical protein EHM24_19680 [Acidobacteria bacterium](54%)	Unknown
>NODE_44228_length_590_cov_4.972816_1#3#521#1#ID=44228_1	124883	172	hypothetical protein ASPVEDRAFT_135419 [Aspergillus versicolor CBS 583.65](27%)	Unknown
>NODE_44389_length_589_cov_2.875486_1#2#589#-1#ID=44389_1	125132	196	phage tail protein [Thalassococcus sp. WRAS1](35%)	Phage related
>NODE_44462_length_588_cov_4.397661_1#2#586#-1#ID=44462_1	125241	195	phage tail tape measure protein [Auraticoccus monumenti](28%)	Phage related
>NODE_44464_length_588_cov_4.200780_1#1#588#-1#ID=44464_1	125244	196	hypothetical protein C4542_09635 [Dehalococcoidia bacterium](32%)	Unknown
>NODE_44471_length_588_cov_3.846004_1#2#586#1#ID=44471_1	125255	195	hypothetical protein [Parcubacteria group bacterium](42%)	Unknown
>NODE_44490_length_588_cov_3.294347_1#3#587#-1#ID=44490_1	125284	195	hypothetical protein EHM31_02695 [Candidatus Aminicenantes bacterium](26%)	Unknown
>NODE_44570_length_587_cov_5.156250_1#70#585#1#ID=44570_1	125416	172	none	Unknown
>NODE_44724_length_586_cov_3.115460_2#70#585#1#ID=44724_2	125665	172	phage recombination protein Bet [Methylomonas koyamae](59%)	Phage related
>NODE_44748_length_586_cov_2.573386_2#153#584#1#ID=44748_2	125703	144	hypothetical protein [Corallococcus sp. AB032C](38%)	Unknown
>NODE_44805_length_585_cov_4.129412_1#2#583#1#ID=44805_1	125798	194	tyrosine-type recombinase/integrase [Winogradskyella tangerina](25%)	Unknown
>NODE_44920_length_584_cov_4.163065_2#124#582#-1#ID=44920_2	125971	152	hypothetical protein [uncultured Mediterranean phage uvMED](34%)	Phage related
>NODE_44956_length_584_cov_3.096267_1#2#583#-1#ID=44956_1	126028	194	pappalysin-2 [Myripristis murdjan](23%)	Unknown
>NODE_45003_length_583_cov_15.937008_1#2#583#-1#ID=45003_1	126104	194	hypothetical protein [Burkholderia pseudomallei](58%)	Phage related
>NODE_45028_length_583_cov_4.578740_1#2#583#1#ID=45028_1	126142	194	site-specific DNA-methyltransferase [Crocinitomicaceae bacterium](28%)	Unknown
>NODE_45044_length_583_cov_3.917323_1#2#583#1#ID=45044_1	126165	194	hypothetical protein [Candidatus Omnitrophica bacterium](52%)	Unknown
>NODE_45047_length_583_cov_3.811024_1#28#582#-1#ID=45047_1	126168	184	phage terminase large subunit family protein [Tatumella ptyseos](43%)	Phage related
>NODE_45348_length_581_cov_2.096838_2#114#581#-1#ID=45348_2	126642	155	hypothetical protein [Planctomycetaceae bacterium](49%)	Unknown
>NODE_45360_length_580_cov_17.843564_1#1#579#-1#ID=45360_1	126658	193	hypothetical protein MA13_gp19 [Pectobacterium phage MA13] (33%)	Phage related
>NODE_45450_length_580_cov_2.655446_1#2#565#-1#ID=45450_1	126795	188	hypothetical protein [Nonomuraea wenchangensis](53%)	Unknown
>NODE_45984_length_575_cov_3.522000_1#2#574#-1#ID=45984_1	127644	191	none	Unknown
>NODE_46006_length_575_cov_2.844000_1#63#575#1#ID=46006_1	127680	171	cold shock domain-containing protein [Chloroflexi bacterium]（34%）	Unknown
>NODE_46054_length_574_cov_10.458918_1#1#573#-1#ID=46054_1	127753	191	hypothetical protein [Agrobacterium vitis]928%）	Unknown
>NODE_46079_length_574_cov_4.903808_1#2#535#1#ID=46079_1	127793	177	phage terminase small subunit P27 family [Herbidospora sakaeratensis]（38%）	True Positive
>NODE_46335_length_572_cov_6.796781_1#73#570#-1#ID=46335_1	128185	165	helix-turn-helix domain-containing protein [Oscillatoria nigro-viridis]（32%）	Unknown
>NODE_46475_length_571_cov_4.923387_1#1#432#1#ID=46475_1	128399	143	hypothetical protein [Bacillus megaterium]（36%）	Unknown
>NODE_46503_length_571_cov_3.719758_1#3#569#-1#ID=46503_1	128448	189	hypothetical protein [Variovorax sp. NFACC29]（58%）	Unknown
>NODE_46572_length_570_cov_42.254545_1#2#568#1#ID=46572_1	128556	189	phage terminase large subunit-like protein [Acidovorax sp. OV235]（59%）	Phage related
>NODE_47019_length_567_cov_4.384146_1#3#566#1#ID=47019_1	129257	188	none	Unknown
>NODE_47114_length_566_cov_310.289206_1#1#564#1#ID=47114_1	129400	188	hypothetical protein PVS_26 [Vibrio phage vB_VspS_VS-ABTNL-3]（42%）	Phage related
>NODE_47227_length_566_cov_2.509165_1#3#566#-1#ID=47227_1	129565	188	site-specific integrase [Myxococcaceae bacterium]（37%）	Unknown
>NODE_47261_length_565_cov_8.651020_1#1#564#-1#ID=47261_1	129620	188	hypothetical protein EKK62_12835 [Acidimicrobiia bacterium]（95%）	Unknown
>NODE_47264_length_565_cov_7.795918_1#2#565#-1#ID=47264_1	129624	188	hypothetical protein CVU62_13915 [Deltaproteobacteria bacterium HGW-Deltaproteobacteria-2]（27%）	Unknown
>NODE_47269_length_565_cov_6.636735_1#2#565#1#ID=47269_1	129630	188	Clp protease-like protein [Acidovorax phage ACPWH]（66%）	Phage related
>NODE_47322_length_565_cov_3.136735_1#1#564#-1#ID=47322_1	129714	188	hypothetical protein [Novosphingobium sp. THN1]（38%）	Unknown
>NODE_47346_length_565_cov_2.563265_1#2#565#1#ID=47346_1	129747	188	hypothetical protein [Microbacterium testaceum]（34%）	Unknown
>NODE_47384_length_564_cov_8.212679_1#2#562#1#ID=47384_1	129804	187	none	Unknown
>NODE_47491_length_564_cov_2.689162_1#1#516#1#ID=47491_1	129961	171	HNH endonuclease [Streptomyces phage SparkleGoddess]（42%）	Phage related
>NODE_47589_length_563_cov_3.364754_1#1#561#1#ID=47589_1	130099	187	hypothetical protein [Patescibacteria group bacterium]（34%）	Unknown
>NODE_47661_length_562_cov_15.860370_1#2#562#1#ID=47661_1	130212	187	none	Unknown
>NODE_47736_length_562_cov_3.004107_1#3#560#-1#ID=47736_1	130325	186	site-specific DNA-methyltransferase [Intrasporangiaceae bacterium URHB0013]（52%）	Other function
>NODE_47916_length_561_cov_1.948560_1#3#560#1#ID=47916_1	130594	186	virulence-associated E family protein [Rhizobium sp. Pop5]（39%）	Unknown
>NODE_47944_length_560_cov_5.057732_1#2#517#1#ID=47944_1	130640	171	hypothetical protein [Flavobacterium soli]（53%）	Unknown
>NODE_47998_length_560_cov_2.942268_1#2#559#-1#ID=47998_1	130722	186	transglycosylase SLT domain-containing protein [Herminiimonas sp. CN](49%)	Other function
>NODE_48028_length_560_cov_2.195876_1#2#559#1#ID=48028_1	130764	186	putative phage terminase large subunit [uncultured Mediterranean phage uvMED](44%)	Phage related
>NODE_48033_length_560_cov_2.047423_1#69#560#1#ID=48033_1	130770	164	phage head-tail adapter protein [Paraburkholderia soli](31%)	Phage related
>NODE_48039_length_559_cov_39.402893_1#2#559#1#ID=48039_1	130778	186	none	Unknown
>NODE_48164_length_559_cov_2.456612_1#3#557#1#ID=48164_1	130963	185	molybdopterin-synthase adenylyltransferase MoeB [Bacillus thuringiensis](25%)	Unknown
>NODE_48191_length_558_cov_12.482402_1#2#556#1#ID=48191_1	131004	185	phospholipase [Microbacterium sp. SZ1](72%)	Other function
>NODE_48379_length_557_cov_3.707469_1#3#557#-1#ID=48379_1	131295	185	TIGR03746 family integrating conjugative element protein [Serratia sp. 1D1416]（31%）	Unknown
>NODE_48417_length_557_cov_2.817427_1#40#531#1#ID=48417_1	131348	163	hypothetical protein COS85_24655 [Armatimonadetes bacterium CG07_land_8_20_14_0_80_59_28]（49%）	Unknown
>NODE_48539_length_556_cov_3.066528_1#2#556#1#ID=48539_1	131537	185	hypothetical protein [bacterium]（30%）	Unknown
>NODE_48596_length_555_cov_9.539583_1#3#554#-1#ID=48596_1	131626	184	none	Unknown
>NODE_48683_length_555_cov_2.843750_1#1#555#1#ID=48683_1	131746	185	NP_203470.1_virion_structural_protein_[Myxococcus_phage_Mx8](42%)	Phage related
>NODE_48969_length_553_cov_2.359833_1#1#552#1#ID=48969_1	132176	184	hypothetical protein D8G53_10010 [Candidatus Saccharimonas sp.]（32%）	Unknown
>NODE_49034_length_552_cov_3.637317_1#2#532#-1#ID=49034_1	132272	177	hypothetical protein [Neisseria sp. HMSC056A03]（30%）	Unknown
>NODE_49123_length_551_cov_9.260504_1#1#531#-1#ID=49123_1	132401	177	DUF1376 domain-containing protein [Achromobacter xylosoxidans]（61%）	Unknown
>NODE_49202_length_551_cov_2.718487_1#1#549#-1#ID=49202_1	132528	183	phenylalanine--tRNA ligase subunit beta [Candidatus Harrisonbacteria bacterium RIFCSPLOWO2_02_FULL_41_11]（40%）	Other function
>NODE_49358_length_550_cov_2.334737_1#1#549#-1#ID=49358_1	132760	183	glycosyl hydrolase [Verrucomicrobiales bacterium]（32%）	Unknown
>NODE_49401_length_549_cov_7.278481_1#1#549#-1#ID=49401_1	132831	183	phage portal protein [Afipia sp.]（35%）	Phage related
>NODE_49488_length_549_cov_2.860759_1#2#547#1#ID=49488_1	132962	182	none	Unknown
>NODE_49576_length_548_cov_4.433404_1#2#547#1#ID=49576_1	133101	182	phage-like protein [Staphylococcus aureus]（34%）	Phage related
>NODE_49682_length_547_cov_47.536017_1#1#546#-1#ID=49682_1	133246	182	phage terminase large subunit-like protein [Acidovorax sp. OV235]（53%）	Phage related
>NODE_49860_length_546_cov_4.957537_1#2#544#-1#ID=49860_1	133502	181	hypothetical protein [Glaciimonas sp. PCH181]（25%）	Unknown
>NODE_50007_length_545_cov_4.223404_1#2#544#-1#ID=50007_1	133713	181	none	Unknown
>NODE_50012_length_545_cov_4.100000_1#3#545#-1#ID=50012_1	133721	181	none	Unknown
>NODE_50285_length_543_cov_4.912393_1#1#501#1#ID=50285_1	134116	166	hypothetical protein DIU79_08485 [Actinobacteria bacterium]（54%）	Unknown
>NODE_50297_length_543_cov_4.177350_1#1#543#1#ID=50297_1	134134	181	transcription-repair coupling factor [Microvirga subterranea]（27%）	Unknown
>NODE_50345_length_543_cov_2.989316_1#2#541#1#ID=50345_1	134203	179	AAA family ATPase [Raineyella antarctica]（31%）	Unknown
>NODE_50424_length_542_cov_5.314775_1#2#541#-1#ID=50424_1	134322	180	none	Unknown
>NODE_50463_length_542_cov_3.197002_1#2#541#-1#ID=50463_1	134378	180	competence/damage-inducible protein A [Acetobacterium bakii](34%)	Unknown
>NODE_50482_length_542_cov_2.963597_1#2#541#1#ID=50482_1	134408	180	hypothetical protein [Haliea sp.](67%)	Unknown
>NODE_50551_length_541_cov_7.875536_1#1#540#-1#ID=50551_1	134504	180	phage portal protein [uncultured Mediterranean phage uvMED](25%)	Phage related
>NODE_50668_length_541_cov_2.201717_1#1#540#1#ID=50668_1	134680	180	none	Unknown
>NODE_50771_length_540_cov_2.812903_1#3#539#-1#ID=50771_1	134839	179	site-specific DNA-methyltransferase [Alphaproteobacteria bacterium](41%)	Other function
>NODE_50798_length_540_cov_2.376344_1#3#539#1#ID=50798_1	134884	179	AAA family ATPase [Pseudodesulfovibrio profundus](34%)	Unknown
>NODE_50812_length_540_cov_1.843011_1#3#539#-1#ID=50812_1	134903	179	hypothetical protein Unbinned1606contig1000_40 [Prokaryotic dsDNA virus sp.](46%)	Phage related
>NODE_50849_length_539_cov_5.581897_1#2#538#1#ID=50849_1	134956	179	none	Unknown
>NODE_50900_length_539_cov_3.105603_1#3#539#-1#ID=50900_1	135036	179	phage portal protein [Kitasatospora sp. MMS16-CNU292](41%)	Phage related
>NODE_50905_length_539_cov_2.987069_1#3#539#1#ID=50905_1	135043	179	MULTISPECIES: GMC family oxidoreductase [Bacillaceae](35%)	Unknown
>NODE_50950_length_539_cov_2.163793_1#1#537#-1#ID=50950_1	135111	179	none	Unknown
>NODE_50952_length_539_cov_2.109914_1#3#539#-1#ID=50952_1	135113	179	unnamed protein product [Vitrella brassicaformis CCMP3155](25%)	Unknown
>NODE_50980_length_538_cov_7.872570_1#1#537#-1#ID=50980_1	135155	179	phage portal protein [uncultured Mediterranean phage uvMED](26%)	Phage related
>NODE_51141_length_537_cov_5.571429_1#3#317#-1#ID=51141_1	135394	105	terminase small subunit [Candidatus Promineofilum breve](40%)	True Positive	Yes
>NODE_51157_length_537_cov_4.521645_1#3#536#1#ID=51157_1	135419	178	U-box domain-containing protein 33-like [Populus alba]（28%）	Unknown
>NODE_51203_length_537_cov_3.216450_1#1#537#-1#ID=51203_1	135490	179	adenosylcobalamin-dependent ribonucleoside-diphosphate reductase [Rhodobacteraceae bacterium WDS4C29]（40%）	Other function
>NODE_51478_length_535_cov_3.845652_1#2#535#-1#ID=51478_1	135886	178	putative terminase large subunit [Escherichia phage vB_EcoP_PTXU04]（37%）	Phage related
>NODE_51485_length_535_cov_3.565217_1#1#534#-1#ID=51485_1	135897	178	none	Unknown
>NODE_51613_length_534_cov_4.568627_1#1#534#1#ID=51613_1	136089	178	phage portal protein [Ochrobactrum sp. LP_5_YM]（31%）	Phage related
>NODE_51759_length_533_cov_4.216157_1#3#533#-1#ID=51759_1	136299	177	hypothetical protein A1Q2_03111 [Trichosporon asahii var. asahii CBS 8904](30%)	Unknown
>NODE_51936_length_532_cov_3.393873_1#3#530#-1#ID=51936_1	136571	176	N4-gp56 family major capsid protein [Chloroflexi bacterium](53%)	Phage related
>NODE_51949_length_532_cov_3.155361_1#2#532#-1#ID=51949_1	136593	177	phage portal protein [Sodalis phage phiSG1](37%)	Phage related
>NODE_52019_length_531_cov_14.728070_1#3#530#-1#ID=52019_1	136700	176	terminase large subunit [Thermobifida phage P1312](56%)	Phage related
>NODE_52079_length_531_cov_3.331140_1#1#531#1#ID=52079_1	136783	177	hypothetical protein Poli38472_012957 [Pythium oligandrum](37%)	Unknown
>NODE_52134_length_531_cov_2.317982_1#3#530#1#ID=52134_1	136867	176	hypothetical protein [Myxococcales bacterium]（33%）	Unknown
>NODE_52173_length_530_cov_9.672527_1#2#529#1#ID=52173_1	136921	176	hypothetical protein [Cetobacterium somerae]（32%）	Unknown
>NODE_52202_length_530_cov_3.843956_1#2#385#-1#ID=52202_1	136969	128	none	Unknown
>NODE_52411_length_529_cov_2.980176_1#2#529#-1#ID=52411_1	137275	176	putative tail fiber protein [Tsukamurella phage TPA2]（62%）	Phage related
>NODE_52432_length_529_cov_2.581498_1#2#529#1#ID=52432_1	137305	176	phage tail tape measure protein [Enterococcus faecium]（34%）	Phage related
>NODE_52494_length_528_cov_5.947020_1#1#528#-1#ID=52494_1	137400	176	PBSX family phage terminase large subunit [Aneurinibacillus aneurinilyticus]（53%）	Phage related
>NODE_52637_length_528_cov_1.958057_1#3#527#1#ID=52637_1	137610	175	hypothetical protein EKI60_04635 [Candidatus Saccharibacteria bacterium]（48%）	Unknown
>NODE_52985_length_525_cov_13.713333_1#3#524#-1#ID=52985_1	138136	174	tyrosine-type recombinase/integrase [Phormidium tenue]（26%）	Unknown
>NODE_52991_length_525_cov_10.520000_1#2#523#1#ID=52991_1	138147	174	PBSX family phage terminase large subunit [Massilia sp.]（70%）	Phage related
>NODE_52999_length_525_cov_5.868889_1#3#524#-1#ID=52999_1	138160	174	phage portal protein [Planctomycetes bacterium]（24%）	Phage related
>NODE_53053_length_525_cov_3.244444_1#3#524#-1#ID=53053_1	138249	174	hypothetical protein A2W85_18385 [Bacteroidetes bacterium GWF2_41_31]（31%）	Unknown
>NODE_53238_length_524_cov_3.113586_1#2#523#1#ID=53238_1	138525	174	hypothetical protein EKK55_14290 [Rhodocyclaceae bacterium]（48%）	Unknown
>NODE_53241_length_524_cov_3.095768_1#2#523#-1#ID=53241_1	138529	174	hypothetical protein BSY19_4756 [Bosea sp. RAC05]（37%）	Unknown
>NODE_53273_length_524_cov_2.643653_1#2#523#-1#ID=53273_1	138574	174	caspase family protein [Chloroflexi bacterium]（31%）	Unknown
>NODE_53336_length_523_cov_7.745536_1#1#522#-1#ID=53336_1	138670	174	hypothetical protein CBD97_00260 [Pelagibacteraceae bacterium TMED237]（31%）	Unknown
>NODE_53345_length_523_cov_5.482143_1#1#522#-1#ID=53345_1	138680	174	hypothetical protein CBD97_00260 [Pelagibacteraceae bacterium TMED237]（31%）	Unknown
>NODE_53378_length_523_cov_3.734375_1#3#521#1#ID=53378_1	138729	173	hypothetical protein [Prevotella copri]（25%）	Unknown
>NODE_53392_length_523_cov_3.270089_1#2#523#1#ID=53392_1	138749	174	hypothetical protein D6822_00145 [Cyanobacteria bacterium J149]（27%）	Unknown
>NODE_53419_length_523_cov_2.776786_1#3#443#-1#ID=53419_1	138786	147	ParB-like nuclease domain-containing protein [Phyllobacterium sp. CL33Tsu]（50%）	Other function
>NODE_53547_length_522_cov_3.040268_1#3#521#-1#ID=53547_1	138979	173	hypothetical protein UW55_C0024G0017 [Candidatus Giovannonibacteria bacterium GW2011_GWA2_44_26]（82%）	Unknown
>NODE_53572_length_522_cov_2.552573_1#1#507#-1#ID=53572_1	139015	169	exodeoxyribonuclease VII large subunit [Brevundimonas viscosa](38%)	Unknown
>NODE_53617_length_521_cov_5.322870_1#3#521#1#ID=53617_1	139083	173	hypothetical protein [Rhodanobacter sp. TND4EH1]（38%）	Unknown
>NODE_53664_length_521_cov_3.390135_1#1#519#-1#ID=53664_1	139155	173	tape measure protein [Campylobacter corcagiensis]（32%）	Phage related
>NODE_53768_length_520_cov_6.975281_1#1#492#-1#ID=53768_1	139306	164	hypothetical protein [Syntrophus gentianae]（28%）	Unknown
>NODE_54001_length_519_cov_3.058559_1#1#519#1#ID=54001_1	139651	173	thioredoxin-disulfide reductase [Chryseobacterium nematophagum]（33%）	Unknown
>NODE_54054_length_519_cov_2.033784_1#1#519#-1#ID=54054_1	139727	173	ATP-grasp domain-containing protein [Halomonas ventosae]（31%）	Unknown
>NODE_54091_length_518_cov_5.191874_1#2#517#-1#ID=54091_1	139784	172	putative terminase large subunit [Prokaryotic dsDNA virus sp.]（31%）	Phage related
>NODE_54219_length_518_cov_2.002257_1#3#518#-1#ID=54219_1	139958	172	hypothetical protein Tel_13045 [Candidatus Tenderia electrophaga](40%)	Phage related
>NODE_54255_length_517_cov_4.536199_1#3#500#-1#ID=54255_1	140015	166	hypothetical protein [Acinetobacter bereziniae](46%)	Unknown
>NODE_54263_length_517_cov_4.185520_1#1#516#-1#ID=54263_1	140028	172	phage large subunit terminase [Ahrensia sp. R2A130]（30%）	Phage related
>NODE_54265_length_517_cov_4.101810_1#1#516#1#ID=54265_1	140031	172	HNH endonuclease domain protein [Candidatus Woesebacteria bacterium GW2011_GWB1_39_12]（43%）	Other function
>NODE_54364_length_517_cov_2.316742_1#1#516#-1#ID=54364_1	140167	172	phage tail tape measure protein [Methylophaga sp.]（40%）	Phage related
>NODE_54427_length_516_cov_4.675737_1#3#515#-1#ID=54427_1	140254	171	ribonuclease D [Marinomonas arctica]（30%）	Unknown
>NODE_54543_length_516_cov_2.095238_1#3#515#1#ID=54543_1	140426	171	none	Unknown
>NODE_54615_length_515_cov_3.679545_1#3#515#-1#ID=54615_1	140531	171	hypothetical protein [Spirosoma oryzae]（20%）	Unknown
>NODE_54647_length_515_cov_3.068182_1#2#514#-1#ID=54647_1	140583	171	DNA ligase [Siphoviridae sp.]（27%）	Phage related
>NODE_54667_length_515_cov_2.736364_1#2#514#-1#ID=54667_1	140613	171	glycosyltransferase [Methanosphaera sp. rholeuAM130]（28%）	Phage related
>NODE_54779_length_514_cov_3.273349_1#1#513#-1#ID=54779_1	140773	171	inositol monophosphatase [Amphritea sp. MCCC 1K03512]（30%）	Unknown
>NODE_54994_length_513_cov_2.114155_1#3#512#1#ID=54994_1	141074	170	SGNH/GDSL hydrolase family protein [Chloroflexi bacterium](37%)	Unknown
>NODE_55006_length_513_cov_1.764840_1#1#465#-1#ID=55006_1	141092	155	DNA modification methylase [Prosthecochloris sp. ZM](48%)	Other function
>NODE_55114_length_512_cov_2.894737_1#1#510#-1#ID=55114_1	141254	170	hypothetical protein [Paraglaciecola polaris](34%)	Unknown
>NODE_55176_length_512_cov_1.649886_1#1#510#1#ID=55176_1	141344	170	hypothetical protein [Agromyces aureus](34%)	Unknown
>NODE_55357_length_511_cov_1.752294_1#1#510#1#ID=55357_1	141605	170	phage terminase large subunit [Acinetobacter baumannii 1525283](29%)	Phage related
>NODE_55575_length_509_cov_3.917051_1#15#509#1#ID=55575_1	141921	165	DNA_methylase_[Microbacterium_phage_Sucha](41%)	Phage related
>NODE_55587_length_509_cov_3.622120_1#1#507#-1#ID=55587_1	141938	169	none	Unknown
>NODE_55645_length_509_cov_2.778802_1#3#509#1#ID=55645_1	142022	169	none	Unknown
>NODE_55785_length_508_cov_3.540416_1#2#508#-1#ID=55785_1	142238	169	hypothetical protein ABS98_17825 [Xanthomonadaceae bacterium SCN 69-48](28%)	Unknown
>NODE_55806_length_508_cov_3.180139_1#3#506#-1#ID=55806_1	142271	168	phage/plasmid_primase,_P4_family,_C-terminal_domain_protein_[Lysobacter_antibioticus](39%)	Phage related
>NODE_55916_length_507_cov_8.532407_1#3#506#-1#ID=55916_1	142426	168	hypothetical protein DRQ47_07710 [Gammaproteobacteria bacterium](41%)	Unknown
>NODE_55943_length_507_cov_4.462963_1#13#507#-1#ID=55943_1	142465	164	C cytochrome precursor [Planctomycetaceae bacterium](27%)	Unknown
>NODE_56009_length_507_cov_2.951389_1#2#505#1#ID=56009_1	142559	167	phage portal protein [Planctomycetes bacterium](47%)	Phage related
>NODE_56080_length_507_cov_1.821759_1#2#505#1#ID=56080_1	142662	168	trifunctional transcriptional regulator/proline dehydrogenase/L-glutamate gamma-semialdehyde dehydrogenase [Sinorhizobium america(29%)	Unknown
>NODE_56167_length_506_cov_3.705336_1#1#504#-1#ID=56167_1	142789	168	hypothetical protein [Paenibacillus pasadenensis](32%)	Unknown
>NODE_56390_length_505_cov_2.483721_1#3#503#-1#ID=56390_1	143102	167	site-specific DNA-methyltransferase [Dietzia sp. UCD-THP](76%)	Other function
>NODE_56401_length_505_cov_2.362791_1#1#504#-1#ID=56401_1	143119	168	[acyl-carrier-protein] S-malonyltransferase [Candidatus Schekmanbacteria bacterium GWA2_38_9](28%)	Unknown
>NODE_56515_length_504_cov_3.666667_1#3#503#1#ID=56515_1	143290	167	site-specific DNA-methyltransferase [Christensenella timonensis](44%)	Other function
>NODE_56627_length_503_cov_11.242991_1#2#502#1#ID=56627_1	143455	167	none	Unknown
>NODE_56706_length_503_cov_3.147196_1#3#485#-1#ID=56706_1	143579	161	putative tail tubular protein [uncultured Mediterranean phage uvMED](40%)	Phage related
>NODE_56863_length_502_cov_3.482436_1#1#501#-1#ID=56863_1	143804	167	hypothetical protein [Thioalkalivibrio sp. ARh3](43%)	Unknown
>NODE_57047_length_501_cov_3.469484_1#1#501#-1#ID=57047_1	144081	167	NAD(P)-binding domain [Ostreococcus tauri](37%)	Unknown
>NODE_57172_length_500_cov_4.703529_1#3#500#1#ID=57172_1	144272	166	helix-turn-helix transcriptional regulator [Streptomyces sp. 3212.4](35%)	Unknown
>NODE_57216_length_500_cov_3.494118_1#3#500#-1#ID=57216_1	144333	166	phage tail tape measure protein [Phycisphaerales bacterium](28%)	Phage related
>NODE_57264_length_500_cov_2.821176_1#3#500#1#ID=57264_1	144408	166	hypothetical protein [Ahniella affigens](25%)	Unknown
>NODE_57422_length_499_cov_3.096698_1#2#499#1#ID=57422_1	144629	166	phage major capsid protein [Flavobacteriaceae bacterium](35%)	Phage related
>NODE_57559_length_498_cov_5.122931_1#3#497#-1#ID=57559_1	144825	165	none	Unknown
>NODE_57564_length_498_cov_4.784870_1#1#498#1#ID=57564_1	144831	166	none	Unknown
>NODE_57600_length_498_cov_3.718676_1#1#498#-1#ID=57600_1	144887	166	portal protein [Podoviridae sp. ctDWo9] (27%)	Phage related
>NODE_57669_length_498_cov_2.617021_1#61#498#1#ID=57669_1	144983	146	hypothetical protein [Salinispora tropica](29%)	Unknown
>NODE_57945_length_496_cov_7.090261_1#1#495#-1#ID=57945_1	145367	165	homing_endonuclease_[Salmonella_phage_SEN22](36%)	Phage related
>NODE_57968_length_496_cov_4.277910_1#1#495#-1#ID=57968_1	145397	165	HAMP domain-containing protein [Rhodobacteraceae bacterium D4M1](36%)	Unknown
>NODE_57979_length_496_cov_4.007126_1#1#495#-1#ID=57979_1	145414	165	Bacteriophage protein [Candidatus Daviesbacteria bacterium GW2011_GWB1_41_5](35%)	Phage related
>NODE_58222_length_495_cov_2.688095_1#3#338#1#ID=58222_1	145761	111	hypothetical protein [Bacillus acanthi](49%)	Unknown
>NODE_58226_length_495_cov_2.645238_1#1#495#-1#ID=58226_1	145767	165	none	Unknown
>NODE_58525_length_493_cov_3.877990_1#3#491#1#ID=58525_1	146180	163	none	Unknown
>NODE_58606_length_493_cov_2.485646_1#1#492#1#ID=58606_1	146295	164	FAD-dependent oxidoreductase [Brenneria sp. CFCC 11842](45%)	Other function
>NODE_58615_length_493_cov_2.356459_1#1#492#1#ID=58615_1	146308	164	none	Unknown
>NODE_58773_length_492_cov_2.678657_1#1#492#1#ID=58773_1	146534	164	galactosyldiacylglycerol synthase [Acidobacteria bacterium](35%)	Other function
>NODE_58911_length_491_cov_3.144231_1#2#490#1#ID=58911_1	146736	163	hypothetical protein A2612_01570 [Candidatus Moranbacteria bacterium RIFOXYD1_FULL_44_12](36%)	Unknown
>NODE_59271_length_489_cov_3.410628_1#3#488#1#ID=59271_1	147251	162	none	Unknown
>NODE_59290_length_489_cov_3.113527_1#2#487#-1#ID=59290_1	147281	162	conserved hypothetical protein [Caulobacter phage Cd1](45%)	Phage related
>NODE_59361_length_489_cov_2.415459_1#2#487#1#ID=59361_1	147390	162	hypothetical protein SAMN04489711_1362 [Acidovorax wautersii](41%)	Unknown
>NODE_59395_length_488_cov_192.837772_1#3#488#-1#ID=59395_1	147438	162	none	Unknown
>NODE_59419_length_488_cov_7.319613_1#2#487#1#ID=59419_1	147471	162	phage head morphogenesis protein, SPP1 gp7 family [Thermus aquaticus]（40%）	Phage related
>NODE_59482_length_488_cov_3.033898_1#106#486#1#ID=59482_1	147560	127	none	Unknown
>NODE_59659_length_487_cov_3.393204_1#1#486#-1#ID=59659_1	147812	162	none	Unknown
>NODE_60086_length_485_cov_3.165854_1#2#484#1#ID=60086_1	148417	161	oxidoreductase [Burkholderia sp. RPE67]（36%）	Unknown
>NODE_60315_length_484_cov_2.735941_1#1#483#1#ID=60315_1	148737	161	succinyl-diaminopimelate desuccinylase [Rhodospirillaceae bacterium]（48%）	Other function
>NODE_60862_length_481_cov_3.379310_1#2#481#-1#ID=60862_1	149492	160	hypothetical protein [Bacteroidales bacterium]（27%）	Unknown
>NODE_60979_length_481_cov_1.625616_1#1#480#1#ID=60979_1	149654	160	none	Unknown
>NODE_61040_length_480_cov_3.960494_1#3#479#1#ID=61040_1	149739	159	hypothetical protein PVS_11 [Vibrio phage vB_VspS_VS-ABTNL-3]（31%）	Phage related
>NODE_61803_length_477_cov_2.154229_1#1#477#1#ID=61803_1	150806	159	site-specific DNA-methyltransferase [Natrinema ejinorense]（40%）	Other function
>NODE_61805_length_477_cov_2.136816_1#1#477#-1#ID=61805_1	150808	159	dCTP deaminase [bacterium HR36]（60%）	Other function
>NODE_62321_length_474_cov_5.248120_1#2#472#-1#ID=62321_1	151553	157	none	Unknown
>NODE_62421_length_474_cov_2.814536_1#2#472#-1#ID=62421_1	151691	157	polysaccharide lyase family 7 protein [Aquimarina aggregata]（32%）	Unknown
>NODE_62682_length_473_cov_2.020101_1#1#471#-1#ID=62682_1	152047	157	RHS repeat protein [Escherichia albertii]（26%）	Unknown
>NODE_62684_length_473_cov_1.942211_1#3#473#-1#ID=62684_1	152049	157	hypothetical protein [Planctomycetaceae bacterium]（42%）	Unknown
>NODE_62711_length_472_cov_10.418136_1#2#472#1#ID=62711_1	152090	157	glycosyltransferase family 2 protein [Thermasporomyces composti]（28%）	Unknown
>NODE_63040_length_471_cov_2.545455_1#2#469#1#ID=63040_1	152558	156	molecular chaperone DnaJ [Actinokineospora spheciospongiae]（32%）	Unknown
>NODE_63435_length_469_cov_2.748731_1#2#469#1#ID=63435_1	153108	156	tail fiber domain-containing protein [Rhizobiales bacterium]（38%）	Phage related
>NODE_63847_length_467_cov_2.742347_1#1#465#1#ID=63847_1	153703	155	hypothetical protein [EBPR podovirus 1] （91%）	Phage related
>NODE_64645_length_463_cov_4.801546_1#2#463#-1#ID=64645_1	154826	154	terminase large subunit [Arthrobacter phage Jasmine] （34%）	Phage related
>NODE_64715_length_463_cov_3.095361_1#1#462#-1#ID=64715_1	154926	154	phage tail tape measure protein [Candidatus Competibacter denitrificans]（63%）	Phage related
>NODE_65250_length_461_cov_2.129534_1#3#461#1#ID=65250_1	155670	153	hypothetical protein [Candidatus Marinimicrobia bacterium]（32%）	Unknown
>NODE_65479_length_460_cov_2.049351_1#1#459#-1#ID=65479_1	155989	153	none	Unknown
>NODE_65495_length_460_cov_1.625974_1#3#458#1#ID=65495_1	156011	152	none	Unknown
>NODE_65576_length_459_cov_3.651042_1#2#457#1#ID=65576_1	156126	152	hypothetical protein SS38_21190 [Enterobacter hormaechei subsp. xiangfangensis]（29%）	Unknown
>NODE_66360_length_456_cov_2.438320_1#1#456#1#ID=66360_1	157202	152	hypothetical_protein_[uncultured_Mediterranean_phage]（44%）	Phage related
>NODE_66638_length_454_cov_86.139842_1#1#453#-1#ID=66638_1	157588	151	hypothetical protein [Candidatus Pacearchaeota archaeon]（40%）	Unknown
>NODE_66640_length_454_cov_46.918206_1#1#453#-1#ID=66640_1	157590	151	hypothetical protein [Candidatus Pacearchaeota archaeon]（40%）	Unknown
>NODE_66768_length_454_cov_2.928760_1#1#453#1#ID=66768_1	157757	151	hypothetical protein DRP25_02895 [Thermotoga sp.]（26%）	Unknown
>NODE_66860_length_454_cov_2.094987_1#2#454#1#ID=66860_1	157880	151	lytic transglycosylase domain-containing protein [Acetobacter persici]（39%）	Unknown
>NODE_67061_length_453_cov_2.187831_1#2#451#-1#ID=67061_1	158147	150	error-prone DNA polymerase [Xylanimicrobium sp. FW10M-9]（36%）	Unknown
>NODE_68108_length_448_cov_3.093834_1#2#448#1#ID=68108_1	159587	149	major capsid protein [uncultured Mediterranean phage uvMED]（61%）	Phage related
>NODE_68191_length_448_cov_2.305630_1#2#448#-1#ID=68191_1	159696	149	none	Unknown
>NODE_69748_length_441_cov_18.043716_1#1#441#-1#ID=69748_1	161827	147	DNA primase [Stenotrophomonas sp. YAU14A_MKIMI4_1]（57%）	Other function
>NODE_70067_length_440_cov_3.323288_1#2#439#-1#ID=70067_1	162267	146	lytic transglycosylase domain-containing protein [Paraburkholderia piptadeniae]（37%）	Unknown
>NODE_70513_length_438_cov_7.157025_2#109#438#1#ID=70513_2	162886	110	GFA family protein [Lysobacter sp. Root494]（29%）	Unknown
>NODE_71612_length_434_cov_2.364903_1#3#434#1#ID=71612_1	164376	144	trypsin beta-like [Papilio polytes]（33%）	Unknown
>NODE_72066_length_432_cov_3.053221_1#1#432#1#ID=72066_1	164989	144	none	Unknown
>NODE_72911_length_429_cov_2.618644_1#1#429#-1#ID=72911_1	166140	143	ribonucleotide reductase of class Ia (aerobic), alpha subunit [Acidovorax phage ACP17]（57%）	Phage related
>NODE_73825_length_425_cov_20.305714_1#1#423#-1#ID=73825_1	167364	141	hypothetical protein [Janthinobacterium sp. Marseille]（55%）	Unknown
>NODE_80658_length_402_cov_2.966361_1#2#400#-1#ID=80658_1	176362	133	DNA_methylase_[Vibrio_phage_VvAW1]（40%）	Phage related
>NODE_81138_length_401_cov_1.512270_1#2#400#-1#ID=81138_1	176980	133	hypothetical protein [Herbaspirillum sp.]（45%）	Unknown
>NODE_81680_length_399_cov_2.737654_1#7#399#1#ID=81680_1	177688	131	phage/plasmid primase, P4 family [Pseudobacteroides cellulosolvens ATCC 35603 = DSM 2933]（42%）	Phage related
>NODE_85221_length_388_cov_4.619808_1#3#386#1#ID=85221_1	182183	128	tail length tape measure protein [Acidovorax citrulli]（33%）	Phage related
>NODE_85465_length_388_cov_2.015974_1#1#387#-1#ID=85465_1	182506	129	hypothetical protein [Fimbriiglobus ruber]（63%）	Unknown
>NODE_85976_length_386_cov_3.466238_1#2#385#-1#ID=85976_1	183166	128	putative TPR-domain containing protein [Leptospirillum ferrodiazotrophum]（42%）	Other function
>NODE_88002_length_381_cov_2.101307_1#1#381#1#ID=88002_1	185773	127	none	Unknown
>NODE_92798_length_369_cov_1.887755_1#2#367#-1#ID=92798_1	191818	122	methyl-accepting chemotaxis protein [Bacteriovorax sp. DB6_IX]（26%）	Unknown
>NODE_99558_length_353_cov_51.978417_1#3#353#-1#ID=99558_1	200231	117	none	Unknown
>NODE_104529_length_343_cov_3.787313_1#3#341#-1#ID=104529_1	206318	113	none	Unknown
>NODE_105763_length_341_cov_2.266917_1#3#266#1#ID=105763_1	207825	87	hypothetical protein GOVbin7744_30 [Prokaryotic dsDNA virus sp.]（42%）	Phage related
>NODE_148005_length_280_cov_1.453659_1#1#279#1#ID=148005_1	257186	93	hypothetical protein [Campylobacter fetus]（30%）	Unknown
>NODE_169838_length_259_cov_2.815217_1#2#259#-1#ID=169838_1	281410	86	dystrophin isoform X5 [Halyomorpha halys]（37%）	Unknown
>NODE_178159_length_253_cov_1.421348_1#2#253#1#ID=178159_1	290482	84	none	Unknown
>NODE_183584_length_249_cov_1.040230_1#3#248#1#ID=183584_1	296363	82	none	Unknown
>NODE_153_length_19938_cov_7.078337_19#19380#19895#-1#ID=153_19	7333	171	phage terminase small subunit P27 family [Caecibacter massiliensis](42%)	True Positive	Yes
>NODE_154_length_19937_cov_47.465361_21#11796#12347#-1#ID=154_21	7354	183	hypothetical protein D6732_00055 [Euryarchaeota archaeon]（42%）	Phage related
>NODE_208_length_15903_cov_7.794604_10#3891#4469#1#ID=208_10	8616	192	hypothetical protein [uncultured Mediterranean phage]（32%）	Phage related
>NODE_1719_length_4274_cov_32.244106_6#2734#3330#1#ID=1719_6	24533	198	hypothetical protein [unclassified Rhizobiales (miscellaneous)]（44%）	Other function
>NODE_3242_length_2958_cov_4.779743_4#1441#1926#-1#ID=3242_4	32919	161	none	Unknown
>NODE_9587_length_1550_cov_5.179661_2#788#1273#-1#ID=9587_2	55911	161	phage terminase small subunit P27 family [Sphingobium baderi](61%)	True Positive	Yes
>NODE_12357_length_1327_cov_3.760383_1#3#518#-1#ID=12357_1	63505	172	putative phage Major head protein [uncultured Mediterranean phage uvMED]（44%）	Phage related
>NODE_29255_length_770_cov_3.463309_2#145#768#1#ID=29255_2	99701	208	hypothetical_protein_[uncultured_Mediterranean_phage_uvMED]（32%）	Phage related
>NODE_32677_length_717_cov_4.032710_1#3#536#1#ID=32677_1	105829	177	none	Phage related
>NODE_39935_length_629_cov_5.642599_2#86#562#-1#ID=39935_2	118067	158	phage terminase small subunit P27 family [Cupriavidus taiwanensis]（47%）	True Positive	Yes
>NODE_42051_length_609_cov_2.625468_1#88#570#-1#ID=42051_1	121458	160	phage terminase small subunit P27 family [Halotalea alkalilenta]（52%）	True Positive	Yes
Sample：ERR2868024
TerL
>NODE_2_length_50120_cov_871.979327_22#24260#26593#1#ID=2_22	80	777	hypothetical protein DBY00_08685 [Flavobacteriales bacterium]（80%）	Phage related
>NODE_8_length_36381_cov_562.549496_8#11233#12975#1#ID=8_8	406	580	hypothetical protein DBY00_08685 [Flavobacteriales bacterium](36%)	Phage related
>NODE_16_length_20505_cov_25.495501_6#2813#4558#1#ID=16_6	669	581	Phage terminase-like protein%2C large subunit [uncultured Clostridium sp.](85%)	True Positive	Yes
>NODE_18_length_17283_cov_14.690330_14#13414#15159#-1#ID=18_14	712	581	TerL [Rhodococcus phage ReqiPoco6](82%)	True Positive	Yes
>NODE_29_length_12207_cov_6.275922_4#2229#3878#1#ID=29_4	895	549	putative terminase large subunit [Bacillus phage BCD7](34%)	True Positive	Yes
>NODE_36_length_9822_cov_10.468414_9#4387#5970#1#ID=36_9	1001	527	putative phage terminase large subunit [Bacteroides phage B124-14](58%)	True Positive	Yes
>NODE_42_length_8289_cov_12.870051_2#427#2109#1#ID=42_2	1084	560	terminase large subunit [Ruminococcus](54%)	True Positive	Yes
>NODE_55_length_6435_cov_5.910031_4#1591#3255#-1#ID=55_4	1237	554	DNA polymerase [Bacillus phage Karezi](39%)	Phage related
>NODE_56_length_6381_cov_644.811729_1#256#1878#-1#ID=56_1	1247	540	none	Phage related
Portal
>NODE_2_length_50120_cov_871.979327_25#30561#32177#1#ID=2_25	83	538	hypothetical protein DBY00_08700 [Flavobacteriales bacterium]（84%）	Phage related
>NODE_11_length_31078_cov_37.234761_33#19006#20649#1#ID=11_33	528	547	portal protein [Myoviridae sp.]（25%）	True Positive
>NODE_14_length_21860_cov_501.046320_33#18633#19826#-1#ID=14_33	627	397	phage portal protein [Ruminococcaceae bacterium]（99%）	True Positive	Yes	Yes
>NODE_16_length_20505_cov_25.495501_9#6123#7367#1#ID=16_9	672	414	phage portal protein [Anaerotruncus colihominis](72%)	True Positive	Yes
>NODE_18_length_17283_cov_14.690330_12#11620#12909#-1#ID=18_12	710	429	phage portal protein [[Clostridium] leptum](99%)	True Positive	Yes
>NODE_29_length_12207_cov_6.275922_6#4388#5974#1#ID=29_6	897	528	phage portal protein [Actinomadura atramentaria]（30%）	True Positive	Yes
>NODE_32_length_11206_cov_11.356022_5#3504#4970#-1#ID=32_5	934	488	hypothetical protein [Klebsiella pneumoniae](58%)	Phage related
>NODE_61_length_5739_cov_7.547326_6#3515#5122#-1#ID=61_6	1294	535	tail protein [Podoviridae sp.](26%)	Phage related
>NODE_84_length_4175_cov_5.940777_3#2374#4173#-1#ID=84_3	1460	599	portal protein [Bacteroides phage crAss001]（22%）	True Positive
>NODE_112_length_3215_cov_11.920570_3#779#1897#-1#ID=112_3	1637	372	portal protein [Lactococcus phage 936 group phage PhiG](98%)	True Positive	Yes
>NODE_125_length_2910_cov_8.416462_1#3#2162#1#ID=125_1	1701	719	hypothetical protein [Parabacteroides distasonis]（82%）	Unknown
>NODE_148_length_2508_cov_5.828373_1#1#1497#-1#ID=148_1	1800	499	structural protein [Flavobacterium phage Fpv3]（26%）	Phage related
>NODE_157_length_2405_cov_3.574468_2#620#1885#1#ID=157_2	1839	421	hypothetical protein [CrAssphage sp.]（35%）	Phage related
>NODE_206_length_1940_cov_2.779841_1#2#1939#-1#ID=206_1	2014	646	tRNA (adenosine(37)-N6)-threonylcarbamoyltransferase complex ATPase subunit type 1 TsaE [Scopulibacillus darangshiensis]（35%）	Other function
>NODE_329_length_1357_cov_1.737327_1#1#1356#-1#ID=329_1	2352	452	Phage-related protein [uncultured Faecalibacterium sp.](28%)	Phage related
TerS
>NODE_4_length_42146_cov_23.549334_24#11111#11554#1#ID=4_24	184	147	terminase small subunit [Dysgonomonas sp. BGC7](35%)	True Positive	Yes
>NODE_5_length_41664_cov_10.616766_33#12752#13198#1#ID=5_33	260	148	hypothetical protein [Butyricicoccus sp. AM42-5AC](39%)	Phage related
>NODE_5_length_41664_cov_10.616766_38#14696#15223#1#ID=5_38	265	175	transposase [Moorea producens](27%)	Phage related
>NODE_33_length_10203_cov_9.004336_16#7479#8027#1#ID=33_16	961	182	gp071 [Rhodococcus phage ReqiPepy6](34%)(base plate protein gene)	Phage related
>NODE_54_length_6752_cov_492.638047_3#540#1097#-1#ID=54_3	1222	185	hypothetical protein NVP1054O_68 [Vibrio phage 1.054.O._10N.261.52.A1] (45%)	Phage related
>NODE_57_length_6190_cov_1144.635534_9#3667#4266#-1#ID=57_9	1263	199	Cysteine proteinases superfamily protein [Arabidopsis thaliana](28%)	Phage related
>NODE_159_length_2387_cov_755.861921_4#1624#2190#-1#ID=159_4	1846	188	phage nucleotide-binding protein [Bacillus sp. OK048](39%)	Phage related
>NODE_424_length_1099_cov_3.534483_2#355#957#-1#ID=424_2	2560	200	VRR-NUC domain-containing protein [bacterium 1XD8-76](97%)	Other function
>NODE_923_length_686_cov_1.900158_1#2#520#-1#ID=923_1	3416	173	glycosyltransferase family 1 protein [Acinetobacter sp. ANC 3813](41%)	Other function
>NODE_1541_length_559_cov_2.162698_1#1#558#-1#ID=1541_1	4271	186	glycosyltransferase family 2 protein [Bacteroides](100%)	Other function
>NODE_1681_length_539_cov_71.904959_1#40#537#-1#ID=1681_1	4448	165	chromosome partitioning protein ParB [Tannerella sp. AF04-6](28%)	Unknown
>NODE_1772_length_529_cov_1.358650_1#2#529#1#ID=1772_1	4566	176	UDP-N-acetylmuramoyl-L-alanine--D-glutamate ligase [Butyrivibrio crossotus](95%)	Other function
>NODE_1864_length_520_cov_1.165591_1#3#518#-1#ID=1864_1	4684	172	C1 family peptidase [Bacteroides sp. KFT8](98%)	Other function
>NODE_2090_length_499_cov_2.006757_1#1#498#1#ID=2090_1	4982	166	Terminase-like family protein [Ruminococcaceae bacterium](67%)	Phage related
>NODE_2821_length_456_cov_1.822943_1#1#456#1#ID=2821_1	5864	152	helicase [Methanosarcina mazei](58%)	Other function
>NODE_3439_length_440_cov_1.293506_1#1#438#-1#ID=3439_1	6593	146	putative flagellar assembly protein FliH [Butyrivibrio crossotus](95%)	Other function
>NODE_4728_length_416_cov_1.005540_1#3#416#-1#ID=4728_1	8121	138	putative flagellar assembly protein FliH [Butyrivibrio crossotus](95%)	Other function
>NODE_6200_length_397_cov_1.119883_1#1#339#-1#ID=6200_1	9818	113	Uncharacterised protein [Streptococcus hyointestinalis](45%)	Phage related
Sample SRR7892426
TerL
>NODE_4_length_58891_cov_188.113179_37#31307#33640#1#ID=4_37	343	777	hypothetical protein DBY00_08685 [Flavobacteriales bacterium]（81%）	Phage related
>NODE_10_length_44391_cov_50.651908_48#39967#41829#1#ID=10_48	741	620	terminase large subunit [Klebsiella phage AltoGao]（52%）	True Positive	Yes	Yes
>NODE_15_length_27422_cov_28.276939_7#1832#3256#1#ID=15_7	860	474	large terminase subunit [Escherichia phage C1](82%)	True Positive	Yes
>NODE_27_length_16804_cov_164.082692_12#7185#8900#-1#ID=27_12	1254	571	terminase [Bacteroides stercoris]（33%）	True Positive
>NODE_29_length_13927_cov_65.042604_18#11432#13219#-1#ID=29_18	1303	575	hypothetical protein [Roseburia faecis]（97%）	Phage related		Yes
>NODE_31_length_13847_cov_77.532990_14#11762#13399#-1#ID=31_14	1328	545	terminase large subunit [Parabacteroides distasonis](99%)	True Positive	Yes
>NODE_37_length_12413_cov_47.450558_15#8445#10190#-1#ID=37_15	1410	581	Phage terminase-like protein%2C large subunit [uncultured Clostridium sp.]（77%）	True Positive	Yes
>NODE_42_length_10924_cov_23.171405_14#8245#9522#-1#ID=42_14	1490	425	Bacteriophage terminase large (ATPase) subunit and inactivated derivatives [uncultured Faecalibacterium sp.](58%)	True Positive	Yes
>NODE_74_length_7380_cov_116.405597_7#2083#3828#1#ID=74_7	1885	581	TerL [Rhodococcus phage ReqiPepy6]（81%）	True Positive	Yes
>NODE_99_length_6285_cov_46.536116_6#2188#3933#1#ID=99_6	2144	581	TerL [Rhodococcus phage ReqiPoco6]（79%）	True Positive	Yes
>NODE_112_length_5892_cov_21.123351_3#1580#3418#1#ID=112_3	2263	612	phage major capsid protein [Clostridiales bacterium]（56%）	Phage related
>NODE_142_length_5257_cov_30.922338_1#28#1791#1#ID=142_1	2503	587	coil containing protein [Vibrio phage 1.205.O._10N.222.51.A7] （24%）	Phage related
>NODE_265_length_3179_cov_33.196223_2#917#2662#-1#ID=265_2	3232	581	terminase large subunit [Gordonia phage Rickmore]（76%）	True Positive	Yes
>NODE_292_length_3016_cov_75.889902_3#760#2505#1#ID=292_3	3385	581	terminase large subunit [Streptomyces phage RosaAsantewaa]（72%）	True Positive	Yes
>NODE_351_length_2652_cov_22.727763_2#853#2289#-1#ID=351_2	3642	478	phage terminase%2C large subunit%2C PBSX family [[Eubacterium] siraeum](63%)	True Positive	Yes
>NODE_368_length_2578_cov_18.586603_3#760#2505#1#ID=368_3	3723	581	terminase large subunit [Streptomyces phage RosaAsantewaa]（72%）	True Positive	Yes
Portal
>NODE_2_length_82283_cov_2647.644270_105#77848#79338#-1#ID=2_105	209	496	hypothetical protein [Klebsiella pneumoniae]（75%）	Phage related
>NODE_15_length_27422_cov_28.276939_16#5384#6778#1#ID=15_16	869	464	portal protein [Salmonella phage Skate](80%)	True Positive	Yes
>NODE_26_length_17239_cov_126.706064_3#2302#3528#1#ID=26_3	1228	408	phage portal protein [Clostridium botulinum]（32%）	True Positive	Yes
>NODE_27_length_16804_cov_164.082692_11#5646#7178#-1#ID=27_11	1253	510	phage portal protein [Bacteroides sp. 9_1_42FAA](28%)	True Positive
>NODE_31_length_13847_cov_77.532990_13#10518#11711#-1#ID=31_13	1327	397	phage portal protein [Parabacteroides distasonis]（99%）	True Positive	Yes	Yes
>NODE_37_length_12413_cov_47.450558_7#3792#5120#-1#ID=37_7	1402	442	phage portal protein [[Eubacterium] rectale](66%)	True Positive	Yes
>NODE_42_length_10924_cov_23.171405_13#6834#8207#-1#ID=42_13	1489	457	phage portal protein [Butyricicoccus sp. AM28-25](99%)	True Positive	Yes
>NODE_50_length_9551_cov_150.118050_12#7931#9421#1#ID=50_12	1605	496	hypothetical protein [Klebsiella pneumoniae](68%)	Phage related
>NODE_53_length_9499_cov_63.025095_10#5696#7225#-1#ID=53_10	1644	509	Phage connector domain containing protein [Trichuris trichiura]（35%）	True Positive
>NODE_59_length_9188_cov_17.594109_10#6578#8650#-1#ID=59_10	1710	690	portal protein [uncultured Mediterranean phage uvMED]（27%）	True Positive	Yes
>NODE_74_length_7380_cov_116.405597_9#4333#5622#1#ID=74_9	1887	429	phage portal protein [[Clostridium] leptum](99%)	True Positive	Yes
>NODE_138_length_5286_cov_14.161728_5#3212#4543#1#ID=138_5	2487	443	phage portal protein [Roseburia sp. AM59-24XD]（99%）	True Positive
>NODE_147_length_5066_cov_17.799840_4#3751#5064#1#ID=147_4	2537	438	phage portal protein [Olsenella sp. Marseille-P4518](56%)	True Positive	Yes
>NODE_160_length_4694_cov_18.452468_6#3448#4692#-1#ID=160_6	2629	414	Phage portal protein%2C SPP1 Gp6-like [uncultured Dorea sp.]（99%）	True Positive	Yes
>NODE_170_length_4503_cov_22.961331_6#3135#4502#1#ID=170_6	2696	456	helix-turn-helix DNA binding domain protein [Arthrobacter phage Xenomorph]（52%）	Phage related
>NODE_202_length_3929_cov_22.569179_1#56#1462#-1#ID=202_1	2862	468	phage portal protein [Eubacterium](99%)	True Positive	Yes
>NODE_203_length_3900_cov_12.900390_2#1385#2899#1#ID=203_2	2866	504	portal protein [Arthrobacter phage Wheelbite](29%)	True Positive	Yes
>NODE_345_length_2682_cov_8.815379_2#1048#2514#1#ID=345_2	3615	488	hypothetical protein [Paenibacillus jamilae](27%)	Phage related
>NODE_374_length_2551_cov_9.961538_1#3#2549#1#ID=374_1	3741	849	TPA: hypothetical protein [Alistipes sp.]（96%）	Unknown
>NODE_739_length_1623_cov_9.590561_1#118#1386#-1#ID=739_1	4977	422	phage portal protein [[Eubacterium] rectale](53%)	True Positive	Yes
>NODE_808_length_1559_cov_5.049867_1#2#1558#1#ID=808_1	5149	519	Uncharacterised protein [Chlamydia trachomatis]（60%）	Unknown
>NODE_893_length_1472_cov_8.750176_1#9#1400#-1#ID=893_1	5384	463	phage major capsid protein [Clostridiales bacterium]（55%）	Phage related	Yes
>NODE_1347_length_1179_cov_4.880783_1#3#1178#-1#ID=1347_1	6459	391	phage portal protein [Clostridium sp. AF28-12]（99%）	True Positive
TerS
>NODE_1_length_84646_cov_171.705087_62#41094#41744#1#ID=1_62	61	216	hypothetical protein [Phage DP-2017a]（51%）	Phage related
>NODE_2_length_82283_cov_2647.644270_34#16978#17532#-1#ID=2_34	138	184	hypothetical protein [Alteromonas sp.]（38%）	Phage related
>NODE_4_length_58891_cov_188.113179_9#3861#4460#-1#ID=4_9	315	199	hypothetical protein DBY00_08555 [Flavobacteriales bacterium]（94%）	Phage related
>NODE_4_length_58891_cov_188.113179_27#16729#17289#1#ID=4_27	333	186	hypothetical protein DBY00_08640 [Flavobacteriales bacterium]（97%）	Phage related
>NODE_17_length_23129_cov_43.928794_16#9225#9779#-1#ID=17_16	957	184	portal protein [Bacteroides phage crAss001](26%)	Phage related
>NODE_19_length_19899_cov_24.250857_22#14156#14695#-1#ID=19_22	1035	179	Phage protein [Klebsiella phage PMBT1]（29%）	Phage related
>NODE_26_length_17239_cov_126.706064_1#89#649#1#ID=26_1	1226	186	P27 family phage terminase small subunit [Clostridium thiosulfatireducens] (35%)	True Positive
>NODE_29_length_13927_cov_65.042604_15#8511#9071#-1#ID=29_15	1300	186	phage capsid scaffolding protein [Clostridium sp. CAG:510]（55%）	Phage related
>NODE_76_length_7272_cov_14.912013_8#3284#3907#-1#ID=76_8	1908	207	recombination related exonuclease [Clostridium phage CPD1] （34%）	Phage related
>NODE_181_length_4354_cov_18.396139_4#978#1853#1#ID=181_4	2759	291	hypothetical protein SEA_MIRAMAE_51 [Mycobacterium phage Miramae] （45%）	Phage related
>NODE_184_length_4268_cov_23.841918_7#3722#4267#1#ID=184_7	2787	182	phage minor structural protein GP20 [Clostridium sp. CAG:413]（41%）	Phage related
>NODE_202_length_3929_cov_22.569179_3#3266#3805#-1#ID=202_3	2864	179	phage terminase small subunit P27 family [Clostridiales]（98%）	True Positive	Yes
>NODE_221_length_3668_cov_52.030446_3#1766#2257#-1#ID=221_3	2992	163	sigma-70 family RNA polymerase sigma factor [Prevotella sp. Marseille-P4119]（81%）	Other function
>NODE_304_length_2913_cov_7.786564_4#2162#2737#1#ID=304_4	3449	191	hypothetical protein [Butyricicoccus sp. AM32-19]（94%）	Other function
>NODE_309_length_2879_cov_12.433782_1#39#740#1#ID=309_1	3466	233	hypothetical protein [Butyricicoccus sp. AM28-25]（96%）	Other function
>NODE_409_length_2448_cov_15.928542_4#1909#2448#-1#ID=409_4	3880	179	DUF3575 domain-containing protein [Bacteroides intestinalis]（93%）	Other function
>NODE_413_length_2439_cov_14.236577_5#1450#1926#1#ID=413_5	3893	158	hypothetical protein [Lactobacillus ruminis]（56%）	Phage related
>NODE_426_length_2353_cov_7.219321_3#557#1075#-1#ID=426_3	3944	172	hypothetical protein [Alistipes finegoldii]（73%）	Unknown
>NODE_476_length_2198_cov_13.922072_2#570#1052#1#ID=476_2	4147	160	hypothetical protein [Blautia sp. BCRC 81119]（51%）	Phage related
>NODE_545_length_1993_cov_14.916409_7#1315#1992#1#ID=545_7	4390	226	Lambda phage uncharacterized protein [Shewanella oneidensis MR-1]（35%）	Phage related
>NODE_736_length_1627_cov_6.316158_3#1113#1625#1#ID=736_3	4972	171	phage terminase small subunit [Firmicutes bacterium CAG:646]（63%）	True Positive	Yes
>NODE_776_length_1592_cov_5.346129_3#922#1539#1#ID=776_3	5074	205	hypothetical protein SNOG_05604 [Parastagonospora nodorum SN15]（48%）	Unknown
>NODE_796_length_1573_cov_10.963109_5#1006#1572#1#ID=796_5	5123	189	hypothetical protein [Roseburia inulinivorans]（61%）	Unknown
>NODE_818_length_1545_cov_16.113423_4#892#1440#-1#ID=818_4	5185	182	hypothetical protein [Butyricicoccus sp. OF10-2]（99%）	Phage related
>NODE_1025_length_1361_cov_3.582695_1#3#500#1#ID=1025_1	5707	165	phage terminase small subunit [[Clostridium] clostridioforme]（67%）	True Positive	Yes
>NODE_1037_length_1352_cov_3.250578_1#116#721#1#ID=1037_1	5729	201	hypothetical protein [Dorea sp. Marseille-P4042]（95%）	Unknown
>NODE_1047_length_1347_cov_7.437307_2#414#974#-1#ID=1047_2	5751	186	phage capsid scaffolding protein [Clostridium sp. CAG:510]（53%）	Phage related
>NODE_1055_length_1338_cov_16.349182_1#151#735#1#ID=1055_1	5769	194	gp015 [Rhodococcus phage ReqiPepy6]（51%）	Phage related
>NODE_1058_length_1336_cov_6.842311_2#223#792#-1#ID=1058_2	5778	189	hypothetical protein [Butyrivibrio sp. AE2032]（38%）	Unknown
>NODE_1073_length_1325_cov_15.433071_1#3#578#1#ID=1073_1	5820	191	hypothetical protein [Faecalibacterium prausnitzii] （78%）	Unknown
>NODE_1227_length_1234_cov_5.830365_1#1#606#1#ID=1227_1	6186	201	hypothetical protein 1013_scaffold3125_00138 [unidentified phage]（99%）	Phage related
>NODE_1274_length_1210_cov_6.251948_2#373#705#-1#ID=1274_2	6305	110	Ubiquitin interaction motif family protein [Trichuris trichiura]（97%）	Other function
>NODE_1595_length_1084_cov_3.487852_1#242#1084#-1#ID=1595_1	6983	280	cell division protein FtsZ [Bacteroides sp. CAG:770]（98%）	Other function
>NODE_1618_length_1076_cov_6.130264_2#531#1076#-1#ID=1618_2	7028	181	reverse transcriptase-like protein [Ruminococcus sp. AF12-5]（69%）	Other function
>NODE_2074_length_951_cov_4.348214_2#133#561#1#ID=2074_2	7874	142	hypothetical protein [Faecalibacterium prausnitzii]（41%）	Unknown
>NODE_2349_length_899_cov_22.101896_1#2#601#-1#ID=2349_1	8351	200	anaerobic ribonucleoside-triphosphate reductase [Ruminococcus sp. AF12-5]（95%）	Other function
>NODE_2538_length_867_cov_2.738916_2#297#848#1#ID=2538_2	8687	183	TPA: SusC/RagA family protein [Rikenellaceae bacterium]（47%）	Other function
>NODE_2795_length_829_cov_13.682171_1#2#559#-1#ID=2795_1	9099	186	alpha-glucan phosphorylase [Bacteroides sp. CAG:770]（98%）	Other function
>NODE_2842_length_824_cov_2.764629_1#54#548#-1#ID=2842_1	9171	164	AXF52478.1_hypothetical_protein_[Siphoviridae_sp.]（44%）	Phage related
>NODE_2965_length_808_cov_5.022576_2#216#788#1#ID=2965_2	9377	190	hypothetical protein [Prevotella sp. MGM1]（44%）	Unknown
>NODE_3076_length_794_cov_5.274696_2#272#793#1#ID=3076_2	9561	174	putative uncharacterized protein [Alistipes sp. CAG:435]（99%）	Unknown
>NODE_3340_length_764_cov_3.174894_1#2#622#1#ID=3340_1	9973	206	hypothetical protein [Roseburia sp.]（97%）	Unknown
>NODE_3396_length_756_cov_7.669044_2#205#756#1#ID=3396_2	10072	184	hypothetical protein [Megasphaera sp.]（67%）	Unknown
>NODE_3500_length_746_cov_4.280753_1#3#746#-1#ID=3500_1	10241	248	phage-structural protein [uncultured crAssphage]（40%）	Phage related
>NODE_3901_length_708_cov_4.721286_1#2#694#1#ID=3901_1	10855	230	phage tail tape measure protein [Butyricicoccus sp. AM32-19]（95%）	Phage related
>NODE_4117_length_691_cov_7.938679_1#1#690#1#ID=4117_1	11178	230	tape measure protein [Porphyromonadaceae bacterium H1]（32%）	Phage related
>NODE_4371_length_671_cov_5.301948_2#118#669#1#ID=4371_2	11544	184	tail fiber protein [Pectobacterium phage PEAT2]（75%）	Phage related
>NODE_4444_length_666_cov_4.270049_2#332#607#1#ID=4444_2	11643	91	tetratricopeptide repeat protein [Bacteroides cellulosilyticus]（53%）	Other function
>NODE_4562_length_659_cov_3.066225_2#79#657#1#ID=4562_2	11814	193	phage capsid protein [Blautia sp. AF22-5LB]（75%）	Phage related
>NODE_4598_length_657_cov_3.046512_1#3#602#1#ID=4598_1	11863	199	RagB/SusD family nutrient uptake outer membrane protein [Parabacteroides sp. AF48-14]（41%）	Other function
>NODE_4653_length_652_cov_6.820771_1#2#652#-1#ID=4653_1	11942	217	rND family efflux transporter MFP subunit [Bacteroides sp. CAG:770]（98%）	Other function
>NODE_4821_length_642_cov_5.488927_1#3#476#1#ID=4821_1	12187	157	phage tape measure protein [Pasteurella multocida subsp. gallicida str. Anand1_poultry]（36%）	Phage related
>NODE_4948_length_634_cov_6.937824_1#2#634#1#ID=4948_1	12351	211	phage tail tape measure protein [Prevotella sp. MGM1]（36%）	Phage related
>NODE_4998_length_631_cov_4.720486_1#12#629#-1#ID=4998_1	12420	205	hypothetical protein [Faecalibacterium prausnitzii]（82%）	Unknown
>NODE_5311_length_613_cov_7.487455_2#89#613#1#ID=5311_2	12869	175	HNH endonuclease [Leptotrichia sp. oral taxon 225]（57%）	Other function
>NODE_5503_length_603_cov_3.368613_1#1#603#1#ID=5503_1	13150	201	hypothetical protein [Clostridium sp. AF12-19]（99%）	Unknown
>NODE_5566_length_600_cov_4.724771_1#37#306#-1#ID=5566_1	13241	89	hypothetical protein [Faecalibacterium prausnitzii] （94%）	Unknown
>NODE_5685_length_594_cov_7.380334_1#1#486#-1#ID=5685_1	13396	162	methyltransferase [Mycobacterium phage DillTech15] （32%）	Phage related
>NODE_5710_length_593_cov_4.570632_1#234#593#-1#ID=5710_1	13426	119	helix-turn-helix transcriptional regulator [Ruminococcus sp. AM34-9LB]（37%）	Other function
>NODE_5974_length_581_cov_2.163498_1#1#534#-1#ID=5974_1	13790	178	hypothetical protein [Prevotella sp.]（82%）	Unknown
>NODE_5975_length_581_cov_1.819392_1#3#581#-1#ID=5975_1	13791	193	hypothetical protein [Bacteroides]（100%）	Other function
>NODE_6136_length_573_cov_8.428571_1#3#572#-1#ID=6136_1	13998	190	hypothetical protein [Clostridiales bacterium]（54%）	Unknown
>NODE_6196_length_571_cov_4.290698_1#1#570#-1#ID=6196_1	14087	190	tetratricopeptide repeat [Alistipes sp. CAG:435]（98%）	Other function
>NODE_6396_length_563_cov_4.153543_1#1#561#-1#ID=6396_1	14347	187	fibronectin type III domain-containing protein [Ruminococcus sp. AM36-17]（88%）	Other function
>NODE_6418_length_562_cov_5.100592_1#60#560#-1#ID=6418_1	14372	166	recombinase family protein [Eubacterium barkeri]（63%）	Other function
>NODE_6495_length_559_cov_1.876984_1#2#559#-1#ID=6495_1	14471	186	4-alpha-glucanotransferase [Eubacterium sp. CAG:581]（100%）	Other function
>NODE_6697_length_551_cov_3.262097_1#1#549#-1#ID=6697_1	14742	183	efflux transporter MFP component RND family [Alistipes sp. CAG:435]（93%）	Other function
>NODE_6743_length_549_cov_3.880567_1#2#547#1#ID=6743_1	14799	182	hypothetical protein [Intestinimonas butyriciproducens]（80%）	Unknown
>NODE_6800_length_547_cov_5.725610_1#2#547#-1#ID=6800_1	14878	182	hypothetical protein [Coprococcus catus]（58%）	Unknown
>NODE_6831_length_546_cov_4.201629_2#223#546#1#ID=6831_2	14915	108	phage_tail_tape_measure_protein_[Rhizobiales_bacterium]（37%）	Phage related
>NODE_6876_length_545_cov_1.593878_1#3#521#-1#ID=6876_1	14971	173	molecular chaperone HtpG [Ruminococcaceae bacterium]（98%）	Other function
>NODE_6989_length_540_cov_5.391753_1#2#538#1#ID=6989_1	15127	179	leucine-rich repeat protein [Ruminococcus]（72%）	Other function
>NODE_7031_length_539_cov_3.086777_1#3#539#1#ID=7031_1	15182	179	putative uncharacterized protein [Clostridium sp. CAG:524]（91%）	Unknown
>NODE_7163_length_534_cov_11.075157_1#3#533#-1#ID=7163_1	15368	177	tape measure protein [Klebsiella phage 1611E-K2-1]（96%）	Phage related
>NODE_7327_length_528_cov_3.171247_1#2#526#1#ID=7327_1	15585	175	putative uncharacterized protein [Bacteroides sp. CAG:530]（82%）	Unknown
>NODE_7351_length_527_cov_6.315678_1#1#525#-1#ID=7351_1	15619	175	susC/RagA family TonB-linked outer membrane protein [Bacteroides sp. CAG:770]（98%）	Other function
>NODE_7508_length_523_cov_1.474359_1#2#523#-1#ID=7508_1	15835	174	IS3 family transposase [Blautia]（98%）	Other function
>NODE_7941_length_510_cov_5.621978_1#2#508#1#ID=7941_1	16382	169	starch-binding protein [Anaeromassilibacillus sp. Marseille-P3876]（81%）	Other function
>NODE_8182_length_503_cov_11.868304_1#2#502#1#ID=8182_1	16697	167	uncharacterized protein BN777_00927 [Bacteroides sp. CAG:770]（97%）	Unknown
>NODE_8537_length_494_cov_2.298405_1#1#492#-1#ID=8537_1	17137	164	M23 family metallopeptidase [Butyricicoccus sp. AM28-25]（67%）	Other function
>NODE_8567_length_493_cov_3.191781_1#2#493#1#ID=8567_1	17172	164	rmuC domain protein [Alistipes sp. CAG:435]（98%）	Other function
>NODE_8673_length_490_cov_6.524138_1#3#488#-1#ID=8673_1	17306	162	DNA cytosine methyltransferase [Prevotella copri]（90%）	Other function
>NODE_8823_length_487_cov_3.916667_1#2#466#-1#ID=8823_1	17501	155	hypothetical protein [Roseburia inulinivorans]（96%）	Unknown
>NODE_9374_length_474_cov_3.434368_1#2#472#-1#ID=9374_1	18184	157	phage tail tape measure protein [Blautia sp. N6H1-15]（49%）	Phage related
>NODE_9646_length_468_cov_9.765133_1#1#468#-1#ID=9646_1	18518	156	ATP-dependent DNA or RNA helicase [Pectobacterium phage PEAT2]（90%）	Phage related
>NODE_10059_length_460_cov_3.822222_1#1#459#-1#ID=10059_1	19021	153	putative uncharacterized protein [Alistipes sp. CAG:435]（100%）	Unknown
>NODE_10623_length_449_cov_2.065990_1#3#449#-1#ID=10623_1	19694	149	phage/plasmid primase, P4 family [Desulfofundulus kuznetsovii DSM 6115]（27%）	Phage related
>NODE_11718_length_431_cov_1.797872_1#1#429#-1#ID=11718_1	21007	143	anaerobic ribonucleoside-triphosphate reductase [Eubacterium sp. CAG:581]（99%）	Other function

## Sheet: Table S7
Table S7. The prediction performance of DeephageTP on the Uniref90 dataset
Uniref90	Protein number	Accuracy	Precision	Recall	F1-score
TerL	12724	0.9749	0.65974	0.5544	0.6025
Portal	23678	0.9508	0.6026	0.6159	0.6092
TerS	5047	0.9618	0.165	0.4549	0.2422

## Sheet: Table S8
Table S8. The prediction performance of DeephageTP with cutoff values on the Uniref90 dataset
Uniref90	Protein number	Accuracy	Precision	Recall	F1-score
TerL	12724	0.973	0.8567	0.2825	0.4248
Portal	23678	0.9547	0.8175	0.3814	0.5201
TerS	5047	0.9852	0.4476	0.1997	0.2762

## Sheet: Table S9
Table S9. The AUPRC score on the testing dataset.
Positive class	AUPRC score
TerL	0.9584
Portal	0.9879
TerS	0.9395
